# Supplementary material for: Innate Immunity and Non-Hodgkin’s Lymphoma (NHL) Related Genes in a Nested Case-Control Study for Gastric Cancer Risk
Source: PLoS One. 2012 Sep 21;7(9):e45274. doi: 10.1371/journal.pone.0045274 (PMC3448653; doi:10.1371/journal.pone.0045274)
Supplement: Supporting Information S1 — Detailed information on the selected SNPs in 203 innate immunity genes and 264 NHL related genes: In the discovery phase. (XLSX) [file pone.0045274.s001.xlsx]

## Sheet: Innate
DBSNPID	STATUS	CHR	CHR_POS	TARGET_GENE_REGION	GENE	GENOMIC_SYSTEMATIC	PROTEIN_SYSTEMATIC	Allele1	Allele2	MAF	HWE P	Global P	Permutated P
rs2738120	Analyzed, Replication	8	6770046	DEFA4/DEFA6	DEFA6	g.IVS1-187C>G		C	G	0.277	1	0.0004614	0.0005
rs2702829	Analyzed, Replication	8	6714615	DEFB1	DEFB1	g.*997T>C		G	A	0.4527	1	0.0009448	0.0015
rs13275170	Analyzed, Replication	8	6767654	DEFA4/DEFA6	DEFA6	g.*2095G>A		C	T	0.2838	1	0.003896	0.0042
rs2286662	Analyzed, Replication	19	17793138	JAK3	JAK3	g.Ex1-13A>G	p.T60A	T	C	0.3	1	0.004394	0.005399
rs2738169	Analyzed, Replication	8	6729968	DEFB1	DEFB1	g.-7178C>T		A	G	0.4	0.3217	0.00459	0.005799
rs2239621	Analyzed, Replication	3	38148737	MYD88	ACAA1	g.IVS3-237G>A		T	C	0.4054	0.7455	0.00858	0.009499
rs11068458	Analyzed	12	116287125	NOS1	NOS1	g.-33867T>C		G	A	0.08667	1	0.01018	0.009399
rs5745696	Analyzed	7	81195996	HGF	HGF	g.IVS9+861G>A		T	C	0.2237	0.717	0.006833	0.0106
rs4804805	Analyzed	19	7722546	CD209	CD209	g.-4148T>C		G	A	0.08667	1	0.007086	0.0117
rs4253302	Analyzed	4	187410482	KLKB1	KLKB1	g.IVS11+149A>G		G	A	0.2568	0.4706	0.01134	0.0118
rs2978858	Analyzed	8	6728026	DEFB1	DEFB1	g.-5236C>G		C	G	0.3867	0.3224	0.01066	0.0136
rs3917854	Analyzed	1	167825659	SELP	SELP	g.IVS16-336G>A		T	C	0.3487	0.5096	0.008049	0.0137
rs2741112	Analyzed	8	6712927	DEFB1	DEFB1	g.*2685G>C		G	C	0.3851	0.1923	0.01172	0.0156
rs1822821	Analyzed	5	41240418	C6	C6	g.IVS1-1309C>G		C	G	0.3041	0.49	0.0142	0.016
rs4821544	Analyzed	22	35588449	NCF4	NCF4	g.IVS1+1258T>C		C	T	0.1579	0.3951	0.01127	0.0177
rs6691334	Analyzed	1	167869007	SELP	SELP	g.-3070T>C		A	G	0.1133	1	0.01774	0.0222
rs1780629	Analyzed	20	36442880	BPI/LBP	BPI/LBP	g.*4154C>T		C	T	0.473	0.3218	0.0156	0.0225
rs6128	Analyzed	1	167829528	SELP	SELP	g.Ex14+59G>A	p.T782T	C	T	0.4079	1	0.01545	0.0227
rs3805711	Analyzed	5	41182034	C6	C6	g.IVS17+3066G>A		T	C	0.2632	0.478	0.01473	0.0229
rs13168926	Analyzed	5	41232832	C6	C6	g.IVS4-1040T>C		G	A	0.375	0.752	0.01529	0.0241
rs2227631	Analyzed	7	100556258	SERPINE1	SERPINE1	g.-2136A>G		A	G	0.3267	0.6516	0.02182	0.0259
rs3176874	Analyzed	1	100972474	VCAM1	VCAM1	g.IVS7-172A>G		G	A	0.2067	1	0.02459	0.0285
rs308447	Analyzed	4	123957996	FGF2	FGF2	g.-9384T>C		T	C	0.09868	1	0.01631	0.03
rs5743407	Analyzed	8	6724445	DEFB1	DEFB1	g.-1655C>G		G	C	0.3733	0.3217	0.02317	0.0316
rs741998	Analyzed	22	35588790	NCF4	NCF4	g.IVS1-1243G>A		A	G	0.09868	1	0.01631	0.0317
rs2702833	Analyzed	8	6712466	DEFB1	DEFB1	g.*3146C>A		T	G	0.3867	0.1861	0.02449	0.0322
rs7551957	Analyzed	1	159736666	FCGR2A	FCGR2A	g.-5215C>T		C	T	0.18	0.6516	0.03302	0.0352
rs708030	Analyzed	3	10187494	IRAK2	IRAK2	g.IVS1+5762C>T		T	C	0.1733	0.1676	0.03845	0.0358
rs3753305	Analyzed	1	167820682	SELP	F5	g.IVS1+1409G>C		C	G	0.1333	0.3095	0.03087	0.0373
rs2293055	Analyzed	12	116186267	NOS1	NOS1	g.IVS12-105C>T		A	G	0.09211	1	0.01792	0.0386
rs1126618	Analyzed	1	205364303	C4BPA/C4BPB	C4BPA	g.Ex6-32T>C	p.G225G	T	C	0.16	0.1643	0.03943	0.0392
rs7444800	Analyzed	5	41253446	C6	C6	g.-14356T>C		G	A	0.4934	0.5089	0.02796	0.0409
rs4468690	Analyzed	17	7881479	ALOX12B/ALOX15B	ALOX15B	g.-1719C>T		T	C	0.46	0.7411	0.03074	0.0418
rs9901734	Analyzed	17	23105156	NOS2A	NOS2A	g.*3242G>C		G	C	0.38	0.3217	0.03304	0.0424
rs308428	Analyzed	4	123983958	FGF2	FGF2	g.IVS1+16001A>G		G	A	0.125	1	0.02557	0.0446
rs12603965	Analyzed	17	29724323	CCL2/CCL7/CCL11/CCL8/CCL13/CCL1	CCL2/CCL7/CCL11/CCL8/CCL13/CCL1	g.-10029G>A		T	C	0.1776	0.6646	0.02909	0.0449
rs12401978	Analyzed	1	167871409	SELP	SELP	g.-5472T>A		T	A	0.1027	0.5694	0.03685	0.0467
rs2738100	Analyzed	8	6780991	DEFA4/DEFA6	DEFA4	g.Ex3+83T>C	p.G85G	G	A	0.3618	0.6911	0.03305	0.0474
rs1892388	Analyzed	10	79288072	DLG5	DLG5	g.IVS1-1416T>A		T	A	0.1271	1	0.04609	0.0479
rs1701958	Analyzed	19	56168527	KLK6/KLK7	KLK6/KLK7	g.*4076C>G		G	C	0.1233	1	0.03524	0.05049
rs647571	Analyzed	1	57192195	C8A/C8B	C8B	g.IVS4+752A>G		T	C	0.4803	1	0.03231	0.05059
rs3091324	Analyzed	17	29625029	CCL2/CCL7/CCL11/CCL8/CCL13/CCL1	CCL2/CCL7/CCL11/CCL8/CCL13/CCL1	g.*2094G>T		T	G	0.1333	1	0.04286	0.05099
rs1898671	Analyzed	5	110435901	TSLP	TSLP	g.IVS1+243C>T		T	C	0.05921	1	0.02636	0.05179
rs1552227	Analyzed	12	116263418	NOS1	NOS1	g.IVS1-9741G>A		T	C	0.2933	0.3194	0.04423	0.05219
rs3766122	Analyzed	1	167833451	SELP	SELP	g.IVS10-413A>G		T	C	0.3311	0.7321	0.03954	0.05319
rs17735961	Analyzed	17	29636453	CCL2/CCL7/CCL11/CCL8/CCL13/CCL1	CCL2/CCL7/CCL11/CCL8/CCL13/CCL1	g.-487A>C		A	C	0.1467	1	0.0477	0.05339
rs6000462	Analyzed	22	35604293	NCF4	NCF4	g.*481A>G		A	G	0.08	1	0.05233	0.05899
rs5760093	Analyzed	22	22570340	MIF	MIF	g.*3046A>G		G	A	0.4867	0.5121	0.0633	0.06059
rs2741692	Analyzed	8	6767517	DEFA4/DEFA6	DEFA6	g.*2232C>T		A	G	0.2055	0.3881	0.05753	0.06099
rs11784359	Analyzed	8	6771046	DEFA4/DEFA6	DEFA6	g.-78C>A		T	G	0.22	1	0.05576	0.06119
rs2286194	Analyzed	7	81193385	HGF	HGF	g.IVS9-116A>T		A	T	0.24	1	0.0505	0.06169
rs4253236	Analyzed	4	187385065	KLKB1	KLKB1	g.-1278C>T		T	C	0.2961	0.5078	0.03885	0.06189
rs7373858	Analyzed	3	10224984	IRAK2	IRAK2	g.IVS3-1289G>A		A	G	0.1067	1	0.04145	0.06289
rs3181077	Analyzed	3	46225656	CCR1/CCR3	CCR1	g.-4847A>G		C	T	0.1645	0.6518	0.0378	0.06499
rs6474	Analyzed	6	32114865	CYP21A2	CYP21A2	g.Ex3+16G>->A	p.R103K	A	G	0.3092	1	0.04438	0.06659
rs12944039	Analyzed	17	23128891	NOS2A	NOS2A	g.IVS11+952C>->T		A	G	0.3882	0.3422	0.04793	0.06689
rs2302004	Analyzed	7	75280791	CCL24	CCL24	g.IVS1+106T>C		A	G	0.34	0.2353	0.06088	0.06799
rs2301247	Analyzed	5	41190285	C6	C6	g.IVS14-428A>G		C	T	0.08553	1	0.03298	0.06809
rs5756381	Analyzed	22	35607562	NCF4	NCF4	g.*3750A>G		A	G	0.32	0.4078	0.06987	0.06839
rs7744	Analyzed	3	38159025	MYD88	MYD88	g.Ex5-493A>G		G	A	0.3108	0.6468	0.06263	0.06889
rs2076074	Analyzed	1	167845210	SELP	SELP	g.IVS8+156C>T		A	G	0.38	0.1865	0.06356	0.07249
rs4821542	Analyzed	22	35582864	NCF4	NCF4	g.-4295C>T		T	C	0.1842	0.1907	0.04847	0.07389
rs2298711	Analyzed	18	55151449	LMAN1	LMAN1	g.Ex11+8A>T	p.M410L	A	T	0.09459	0.5146	0.08077	0.07439
rs11465352	Analyzed	7	75236658	CCL26	CCL26	g.*288G>T		A	C	0.2333	0.6924	0.06675	0.07469
rs2235133	Analyzed	21	45145600	ITGB2	ITGB2	g.IVS6+235G>A		T	C	0.3621	0.6298	0.07123	0.07609
rs3107215	Analyzed	3	188500062	MASP1	MASP1	g.-7947C>G		C	G	0.09459	1	0.08077	0.07719
rs760519	Analyzed	22	35593652	NCF4	NCF4	g.IVS4+202C>T		C	T	0.2703	0.5882	0.06247	0.07739
rs698084	Analyzed	3	188480342	MASP1	MASP1	g.IVS2+5965G>A		T	C	0.1133	1	0.08092	0.07939
rs1316873	Analyzed	2	95062373	MAL	MAL	g.IVS1+7016C>G		G	C	0.3986	1	0.0666	0.07959
rs4844592	Analyzed	1	205567834	DAF	DAF	g.IVS5+1029T>A		A	T	0.4797	0.7346	0.05679	0.08349
rs268626	Analyzed	8	71672647	TRAM1	TRAM1	g.IVS4+37T>C		A	G	0.2703	0.3037	0.07076	0.08359
rs1654537	Analyzed	19	56158328	KLK6/KLK7	KLK6/KLK7	g.IVS5+42T>C		G	A	0.3533	1	0.1016	0.08479
rs11587213	Analyzed	1	159451499	FCER1G	FCER1G	g.-236A>G		G	A	0.06667	1	0.04626	0.08539
rs920724	Analyzed	10	54202803	MBL2	MBL2	g.-1401T>C		G	A	0.1333	0.1968	0.05817	0.08949
rs3745523	Analyzed	19	56026702	KLK1/KLK15	KLK1/KLK15	g.-141G>A		T	C	0.3158	0.3979	0.05736	0.08989
rs3212701	Analyzed	19	17818024	JAK3	JAK3	g.IVS1+1731G>A		T	C	0.36	0.5084	0.07847	0.09249
rs3753306	Analyzed	1	167866856	SELP	SELP	g.-919G>A		C	T	0.1733	1	0.08167	0.09289
rs2741683	Analyzed	8	6775890	DEFA4/DEFA6	DEFA4	g.*5061A>G		T	C	0.3667	0.3165	0.07878	0.09369
rs3027279	Analyzed	17	7968318	HES7	HES7	g.-190A>C		T	G	0.16	1	0.07274	0.09479
rs2291908	Analyzed	12	116169521	NOS1	NOS1	g.IVS18+15A>G		C	T	0.4605	0.528	0.06893	0.09589
rs2842707	Analyzed	1	205364107	C4BPA/C4BPB	C4BPA	g.IVS5-36G>C		G	C	0.3	0.7248	0.07962	0.09609
rs7826831	Analyzed	8	6730518	DEFB1	DEFB1	g.-7728G>A		C	T	0.1067	0.5733	0.07986	0.09919
rs3759324	Analyzed	12	6355922	LTBR	SCNN1A	g.-1711G>A		T	C	0.38	1	0.08645	0.09949
rs7443604	Analyzed	5	41234769	C6	C6	g.IVS4+858C>A		T	G	0.3487	1	0.0669	0.09969
rs2619508	Analyzed	3	10190950	IRAK2	IRAK2	g.IVS1-3572T>G		G	T	0.1133	1	0.06173	0.1002
rs683916	Analyzed	1	57198062	C8A/C8B	C8B	g.IVS2+219T>A		T	A	0.32	0.4946	0.09805	0.1006
rs7217186	Analyzed	17	4486141	ALOX15	ALOX15	g.IVS7-129G>A		C	T	0.4189	0.5037	0.08734	0.1045
rs9459883	Analyzed	6	167450507	CCR6	CCR6	g.-19105C>G		C	G	0.1733	1	0.09477	0.1055
rs1123425	Analyzed	12	116270488	NOS1	NOS1	g.IVS1+13212T>C		A	G	0.3378	0.7333	0.09932	0.1058
rs2240478	Analyzed	7	75239354	CCL26	CCL26	g.IVS2+4C>T		A	G	0.3716	0.6924	0.0901	0.1062
rs2275954	Analyzed	20	36396081	BPI/LBP	BPI/LBP	g.IVS12-165A>G		G	A	0.46	1	0.09981	0.1064
rs3212711	Analyzed	19	17816021	JAK3	JAK3	g.IVS2+22C>T		A	G	0.3176	1	0.09186	0.1071
rs324020	Analyzed	12	55772300	STAT6	NAB2	g.IVS2-198A>C		C	A	0.2808	0.4706	0.09081	0.1073
rs698102	Analyzed	3	188475975	MASP1	MASP1	g.IVS2+10332G>A		T	C	0.09868	0.5697	0.06173	0.1075
rs658285	Analyzed	1	57188923	C8A/C8B	C8B	g.IVS5-910C>T		A	G	0.3176	0.4946	0.08411	0.1087
rs10897270	Analyzed	11	61939583	SCGB1A1	SCGB1A1	g.-3560C>T		C	T	0.4865	0.1005	0.1409	0.1104
rs2279785	Analyzed	2	95053985	MAL	MAL	g.-1279G>C		C	G	0.1	1	0.06913	0.1107
rs3794763	Analyzed	17	23135353	NOS2A	NOS2A	g.IVS5-1094C>T		A	G	0.3684	0.1143	0.07921	0.1108
rs2664153	Analyzed	19	56107064	KLK4	KLK4	g.-1257T>C		A	G	0.1733	1	0.07899	0.1118
rs4804806	Analyzed	19	7722625	CD209	CD209	g.-4227T>C		A	G	0.12	1	0.09155	0.1132
rs2569192	Analyzed	5	139995392	CD14	CD14	g.-2551G>C		C	G	0.1014	1	0.1179	0.1137
rs3113002	Analyzed	2	95064457	MAL	MAL	g.IVS1+9100G>A		G	A	0.2945	0.4671	0.0984	0.1146
rs11064160	Analyzed	12	6372969	LTBR	LTBR	g.*2604C>T		T	C	0.24	0.6924	0.1135	0.1149
rs3885907	Analyzed	13	30212455	ALOX5AP	ALOX5AP	g.IVS1-3742C>A		C	A	0.2133	0.5611	0.1248	0.1169
rs12150211	Analyzed	17	23158559	NOS2A	NOS2A	g.-8596T>C		A	G	0.3356	0.49	0.0977	0.1177
rs1905045	Analyzed	8	75062568	LY96	LY96	g.-3663C>T		C	T	0.2333	1	0.09841	0.1184
rs3112982	Analyzed	2	95079594	MAL	MAL	g.IVS3+416T>C		T	C	0.3133	0.7268	0.1064	0.1196
rs13090836	Analyzed	3	168990756	SERPINI1	SERPINI1	g.IVS2-98T>C		C	T	0.2667	0.616	0.09763	0.12
rs230547	Analyzed	4	103755307	NFKB1	NFKB1	g.IVS23-1330T>C		T	C	0.3553	1	0.08464	0.12
rs8078865	Analyzed	17	7896039	ALOX12B/ALOX15B	ALOX15B	g.*3430C>T		T	C	0.1733	0.1643	0.1236	0.1202
rs3093030	Analyzed	19	10258403	ICAM1/ICAM4/ICAM5	ICAM1/ICAM4/ICAM5	g.*1439C>T		T	C	0.3067	0.4078	0.1063	0.1211
rs2302862	Analyzed	3	10233493	IRAK2	IRAK2	g.IVS6-125T>C		C	T	0.1149	1	0.09217	0.1222
rs13251447	Analyzed	8	6778120	DEFA4/DEFA6	DEFA4	g.*2831T>G		A	C	0.2467	0.3095	0.09997	0.1227
rs7548659	Analyzed	1	11030026	MASP2	MASP2	g.-174C>A		G	T	0.3133	0.7268	0.1064	0.1228
rs7502772	Analyzed	17	29723177	CCL2/CCL7/CCL11/CCL8/CCL13/CCL1	CCL2/CCL7/CCL11/CCL8/CCL13/CCL1	g.-8883T>C		G	A	0.3649	1	0.09832	0.1232
rs2235091	Analyzed	19	56102283	KLK4	KLK4	g.IVS4-129T>C		G	A	0.1579	0.3361	0.07667	0.125
rs11003132	Analyzed	10	54207453	MBL2	MBL2	g.-6051G>A		T	C	0.08667	0.0411	0.07542	0.1274
rs11117564	Analyzed	1	205603594	DAF	DAF	g.*4015A>C		C	A	0.42	0.2967	0.1173	0.128
rs263413	Analyzed	3	10217711	IRAK2	IRAK2	g.IVS3+512G>A		A	G	0.2867	0.08142	0.1221	0.1296
rs764917	Analyzed	5	110428406	TSLP	TSLP	g.-7081A>C		C	A	0.24	0.2861	0.1061	0.1305
rs4795904	Analyzed	17	29643094	CCL2/CCL7/CCL11/CCL8/CCL13/CCL1	CCL2/CCL7/CCL11/CCL8/CCL13/CCL1	g.*4271A>G		A	G	0.09333	1	0.0849	0.131
rs6950982	Analyzed	7	100553323	SERPINE1	SERPINE1	g.-5071A>G		G	A	0.22	1	0.1326	0.1317
rs13135645	Analyzed	4	187418857	KLKB1	KLKB1	g.*2496C>T		C	T	0.1267	0.1968	0.09353	0.1331
rs671137	Analyzed	1	57092068	C8A/C8B	C8A	g.-1094T>C		T	C	0.1712	0.6562	0.1211	0.1336
rs408121	Analyzed	17	29701261	CCL2/CCL7/CCL11/CCL8/CCL13/CCL1	CCL2/CCL7/CCL11/CCL8/CCL13/CCL1	g.*10429T>C		A	G	0.1513	1	0.08049	0.1351
rs10797888	Analyzed	1	181813655	NCF2	NCF2	g.IVS2-190A>G		C	T	0.09211	1	0.07583	0.1358
rs816353	Analyzed	12	116169163	NOS1	NOS1	g.IVS18+373C>A		G	T	0.4342	1	0.09873	0.136
rs925453	Analyzed	4	187416204	KLKB1	KLKB1	g.Ex15+36T>C	p.N587N	T	C	0.09211	1	0.07583	0.1361
rs738807	Analyzed	22	22564245	MIF	MIF	g.-2416C>T		T	C	0.1733	0.1643	0.1452	0.1373
rs1007888	Analyzed	22	22571101	MIF	MIF	g.*3807T>C		T	C	0.4267	0.3348	0.1254	0.1376
rs6890674	Analyzed	5	66511607	CD180	CD180	g.*2833T>A		A	T	0.1667	0.6578	0.1235	0.1378
rs3917410	Analyzed	1	167967732	SELE	SELE	g.IVS3-25T>C		G	A	0.06081	1	0.09057	0.1381
rs1780617	Analyzed	20	36407571	BPI/LBP	BPI/LBP	g.-762G>A		G	A	0.2267	0.4265	0.1138	0.1389
rs776514	Analyzed	3	10250475	IRAK2	IRAK2	g.IVS10-668T>C		T	C	0.2067	0.6691	0.1474	0.1392
rs198968	Analyzed	19	56105140	KLK4	KLK4	g.IVS1+606T>C		G	A	0.2697	1	0.094	0.1398
rs266851	Analyzed	19	56028151	KLK1/KLK15	KLK1/KLK15	g.-1590G>A		T	C	0.09459	1	0.1006	0.1398
rs2838737	Analyzed	21	45160008	ITGB2	ITGB2	g.IVS1-4880A>G		T	C	0.3333	0.7416	0.1055	0.1398
rs2791491	Analyzed	1	86734919	CLCA1/CLCA2	CLCA1	g.IVS13+973G>T		T	G	0.1689	1	0.12	0.1399
rs10800309	Analyzed	1	159738782	FCGR2A	FCGR2A	g.-3099G>A		G	A	0.1974	0.3979	0.08922	0.14
rs1436849	Analyzed	12	64861385	IRAK3	IRAK3	g.-7961C>T		C	T	0.22	1	0.1482	0.1415
rs11588654	Analyzed	1	181823018	NCF2	NCF2	g.IVS1-283A>G		C	T	0.12	1	0.1378	0.1437
rs2122564	Analyzed	5	41023131	C7	C7	g.*5698C>T		T	C	0.1733	0.1643	0.1452	0.1451
rs266850	Analyzed	19	56028009	KLK1/KLK15	KLK1/KLK15	g.-1448T>C		G	A	0.07333	0.3442	0.1272	0.1468
rs679682	Analyzed	11	60386972	GPR44	ZP1	g.-4638T>C		C	T	0.3493	0.1738	0.1364	0.1471
rs744141	Analyzed	12	7146446	C1RL	C1RL	g.IVS2-487C>G		G	C	0.2039	0.2354	0.1024	0.1472
rs12753665	Analyzed	1	181812684	NCF2	NCF2	g.IVS3+673C>T		G	A	0.4267	0.7248	0.1346	0.1479
rs7548864	Analyzed	1	157533879	FCER1A	FCER1A	g.IVS1-4841G>A		G	A	0.4211	0.478	0.1052	0.1479
rs11938826	Analyzed	4	123992064	FGF2	FGF2	g.IVS1+24107C>G		G	C	0.1284	0.5595	0.1422	0.1481
rs9380500	Analyzed	6	35374209	DEF6	DEF6	g.IVS1+502G>C		G	C	0.26	0.1358	0.126	0.1498
rs2695234	Analyzed	4	24413336	SOD3	SOD3	g.*2371A>G		A	G	0.161	1	0.1414	0.1503
rs1827924	Analyzed	2	228377979	CCL20	CCL20	g.-8892A>G		G	A	0.2933	0.7282	0.1419	0.1505
rs352143	Analyzed	3	52239947	TLR9	PTK9L	g.Ex6-22A>G	p.K196K	C	T	0.125	0.3412	0.1147	0.1509
rs13064994	Analyzed	3	188488710	MASP1	MASP1	g.IVS1-2172C>T		A	G	0.1118	0.1306	0.09142	0.151
rs10507393	Analyzed	13	30225521	ALOX5AP	ALOX5AP	g.IVS3+1262T>C		C	T	0.1933	0.5733	0.1565	0.1539
rs588019	Analyzed	17	35968633	CCR7	CCR7	g.IVS2+38C>T		A	G	0.05921	1	0.07588	0.1552
rs2622653	Analyzed	8	71651754	TRAM1	TRAM1	g.IVS10-1960T>C		A	G	0.2632	0.1697	0.1092	0.1558
rs17038748	Analyzed	3	39341544	CCR8	CCR8	g.-7282G>T		G	T	0.1333	1	0.1469	0.1563
rs268594	Analyzed	8	71675684	TRAM1	TRAM1	g.IVS1-813A>G		T	C	0.2763	0.1582	0.1081	0.1564
rs11667267	Analyzed	19	4774689	TICAM1	TICAM1	g.-5299T>C		G	A	0.46	0.5121	0.1751	0.1583
rs10409294	Analyzed	19	7721221	CD209	CD209	g.-2823T>C		A	G	0.1944	0.5261	0.1494	0.1584
rs2000466	Analyzed	22	22567862	MIF	MIF	g.*568G>T		G	T	0.1867	0.649	0.1697	0.1594
rs7969157	Analyzed	12	92481234	SOCS2	SOCS2	g.-9570G>T		T	G	0.3355	0.2255	0.1159	0.1615
rs7560571	Analyzed	2	95056501	MAL	MAL	g.IVS1+1144G>A		G	A	0.3649	0.17	0.1375	0.1618
rs4795067	Analyzed	17	23130802	NOS2A	NOS2A	g.IVS9-593T>C		G	A	0.2027	1	0.1407	0.1644
rs6441929	Analyzed	3	45899795	CCR9	CCR9	g.-11634A>G		G	A	0.32	0.7268	0.157	0.1682
rs3742089	Analyzed	12	7140740	C1RL	C1RL	g.Ex6+162A>G		C	T	0.3289	0.6911	0.1103	0.1698
rs916055	Analyzed	17	4481583	ALOX15	ALOX15	g.Ex14+241T>C		G	A	0.4459	0.01796	0.135	0.1705
rs4807650	Analyzed	19	4772612	TICAM1	TICAM1	g.-3222G>A		C	T	0.4867	1	0.1555	0.1728
rs5756573	Analyzed	22	35963721	RAC2	RAC2	g.IVS2+3852C>T		A	G	0.4138	0.1995	0.1656	0.1734
rs2734704	Analyzed	1	86723220	CLCA1/CLCA2	CLCA1	g.IVS6-394A>G		A	G	0.1757	0.3238	0.1608	0.1745
rs186493	Analyzed	16	3229332	MEFV	MEFV	g.*3809C>A		T	G	0.4934	0.2035	0.1281	0.1756
rs729749	Analyzed	22	35593792	NCF4	NCF4	g.IVS4+342T>C		T	C	0.38	0.7119	0.1677	0.1765
rs806019	Analyzed	19	56097794	KLK4	KLK4	g.*4207C>G		G	C	0.1974	0.5697	0.1178	0.1765
rs2979451	Analyzed	19	56103200	KLK4	KLK4	g.IVS4+227A>G		C	T	0.1554	0.3528	0.1521	0.1786
rs3729508	Analyzed	17	23133157	NOS2A	NOS2A	g.IVS7+11A>G		T	C	0.3882	1	0.1293	0.179
rs12489891	Analyzed	3	46285522	CCR1/CCR3	CCR3	g.*2800C>G		C	G	0.4333	0.1065	0.1276	0.1812
rs2232578	Analyzed	20	36408129	BPI/LBP	BPI/LBP	g.-204A>G		G	A	0.22	0.3983	0.1777	0.182
rs1001073	Analyzed	3	188427399	MASP1	MASP1	g.IVS13-397T>C		G	A	0.1149	1	0.1865	0.1834
rs6127776	Analyzed	20	36394014	BPI/LBP	BPI/LBP	g.IVS12+1108T>C		C	T	0.3	1	0.1652	0.1857
rs4969168	Analyzed	17	73865388	SOCS3	SOCS3	g.Ex2-935T>C		A	G	0.4722	0.7403	0.1615	0.1866
rs5743303	Analyzed	4	187225847	TLR3	TLR3	g.-8920A>T		T	A	0.1645	0.4142	0.1246	0.1872
rs2494251	Analyzed	1	157547775	FCER1A	OR10J3	g.*2308T>C		A	G	0.3224	0.2354	0.1412	0.1889
rs4969170	Analyzed	17	73872133	SOCS3	SOCS3	g.-5361T>C		G	A	0.07237	1	0.1031	0.1891
rs738806	Analyzed	22	22564172	MIF	MIF	g.-2489A>G		A	G	0.3867	0.7119	0.2228	0.1909
rs6770096	Analyzed	3	32971513	CCR4	CCR4	g.*511C>T		T	C	0.375	0.272	0.135	0.191
rs3782221	Analyzed	12	116280264	NOS1	NOS1	g.IVS1+3436C>T		G	A	0.4133	1	0.1453	0.1916
rs10507391	Analyzed	13	30210096	ALOX5AP	ALOX5AP	g.IVS1+2284A>T		A	T	0.3355	0.5024	0.1378	0.1926
rs698085	Analyzed	3	188480117	MASP1	MASP1	g.IVS2+6190C>T		G	A	0.3933	1	0.1745	0.1934
rs4075131	Analyzed	13	30208919	ALOX5AP	ALOX5AP	g.IVS1+1107A>G		G	A	0.3224	0.3162	0.1412	0.1939
rs1982266	Analyzed	10	54200642	MBL2	MBL2	g.IVS1-90T>C		A	G	0.2568	0.02139	0.1604	0.1948
rs8086634	Analyzed	18	72830180	MBP	MBP	g.IVS6-324G>A		T	C	0.1316	0.5643	0.1181	0.1969
rs1838066	Analyzed	10	54199331	MBL2	MBL2	g.IVS2-250T>C		A	G	0.4257	0.1695	0.2063	0.197
rs11465353	Analyzed	7	75236585	CCL26	CCL26	g.*361G>T		C	A	0.08784	1	0.1554	0.1977
rs779904	Analyzed	3	10243777	IRAK2	IRAK2	g.IVS10+660T>C		C	T	0.1959	0.4078	0.1668	0.2021
rs9579648	Analyzed	13	30225032	ALOX5AP	ALOX5AP	g.IVS3+773G>C		C	G	0.05333	0.1968	0.1745	0.2042
rs224234	Analyzed	16	3231971	MEFV	MEFV	g.*1170G>T		C	A	0.4013	1	0.1549	0.2052
rs679350	Analyzed	1	57137400	C8A/C8B	C8A	g.IVS7-7528G>A		A	G	0.3733	0.2637	0.1867	0.2052
rs12431114	Analyzed	13	30215452	ALOX5AP	ALOX5AP	g.IVS1-745A>G		G	A	0.05333	0.1968	0.1745	0.2057
rs7273717	Analyzed	20	36405123	BPI/LBP	BPI/LBP	g.-3210C>T		C	T	0.4276	0.5266	0.1517	0.2062
rs268593	Analyzed	8	71674931	TRAM1	TRAM1	g.IVS1-60G>A		C	T	0.3867	0.4814	0.2094	0.2066
rs758946	Analyzed	4	24416385	SOD3	SOD3	g.*5420C>T		C	T	0.08108	0.3528	0.2128	0.2074
rs2072711	Analyzed	22	35598501	NCF4	NCF4	g.IVS7+88A>G		A	G	0.277	1	0.1776	0.2078
rs7250423	Analyzed	19	17819617	JAK3	JAK3	g.IVS1+138G>A		T	C	0.2297	1	0.1938	0.2085
rs2425362	Analyzed	20	36402531	BPI/LBP	BPI/LBP	g.*3530A>C		C	A	0.42	0.7417	0.2039	0.2086
rs6938946	Analyzed	6	35388675	DEF6	DEF6	g.IVS5+148C>T		C	T	0.2632	0.3161	0.1504	0.209
rs816347	Analyzed	12	116174306	NOS1	NOS1	g.IVS17+1520C>T		A	G	0.06	1	0.1213	0.2091
rs696405	Analyzed	3	188438917	MASP1	MASP1	g.IVS11-1868A>C		T	G	0.1267	0.2154	0.2423	0.2115
rs10854693	Analyzed	22	35581956	NCF4	NCF4	g.-5203A>G		A	G	0.3267	0.2932	0.1957	0.2121
rs17652343	Analyzed	17	29596968	CCL2/CCL7/CCL11/CCL8/CCL13/CCL1	CCL2/CCL7/CCL11/CCL8/CCL13/CCL1	g.-9513A>G		G	A	0.08667	1	0.1409	0.213
rs4489574	Analyzed	1	159456337	FCER1G	FCER1G	g.*979C>T		C	T	0.4867	0.007238	0.2259	0.2138
rs9912048	Analyzed	17	7949260	ALOXE3	ALOXE3	g.IVS12-1002G>A		C	T	0.4865	0.17	0.2346	0.2156
rs1618440	Analyzed	19	56169340	KLK6/KLK7	KLK6/KLK7	g.*3263G>A		C	T	0.4067	0.745	0.2013	0.2164
rs125810	Analyzed	21	45128077	ITGB2	ITGB2	g.*2633T>C		A	G	0.3267	0.07819	0.2082	0.2217
rs1984266	Analyzed	1	57205683	C8A/C8B	C8B	g.-1473C>T		A	G	0.34	0.3205	0.1767	0.2222
rs4301834	Analyzed	12	6371104	LTBR	LTBR	g.*739A>G		G	A	0.1267	1	0.1916	0.2231
rs6749704	Analyzed	2	228386086	CCL20	CCL20	g.-785C>T		C	T	0.2867	0.7119	0.183	0.2243
rs11245936	Analyzed	11	1074362	MUC6	MUC6	g.-47649T>C		A	G	0.07432	1	0.2811	0.2259
rs9859639	Analyzed	3	168969000	SERPINI1	SERPINI1	g.IVS1-20593A>T		T	A	0.1908	0.5697	0.1525	0.2275
rs6451568	Analyzed	5	41233981	C6	C6	g.IVS4+1646G>A		C	T	0.2333	0.584	0.2058	0.2276
rs4251460	Analyzed	12	42449035	IRAK4	IRAK4	g.IVS2+693A>C		C	A	0.1267	1	0.1916	0.2277
rs3794624	Analyzed	16	87244575	CYBA	CYBA	g.IVS1+290C>T		A	G	0.1071	0.5261	0.1781	0.228
rs2071006	Analyzed	9	138959725	C8G	C8G	g.Ex1-7T>G	p.A44A	T	G	0.2458	0.2034	0.1925	0.2291
rs1801046	Analyzed	12	7133440	C1RL	C1RL	g.*6688C>T		A	G	0.3947	0.7535	0.174	0.2294
rs281432	Analyzed	19	10251658	ICAM1/ICAM4/ICAM5	ICAM1/ICAM4/ICAM5	g.IVS2-3499C>G		G	C	0.3667	0.2637	0.2418	0.2305
rs6762462	Analyzed	3	188424749	MASP1	MASP1	g.IVS15+1057G>T		C	A	0.2171	0.6911	0.1587	0.2306
rs2227672	Analyzed	7	100562406	SERPINE1	SERPINE1	g.IVS4+336G>T		T	G	0.14	1	0.2019	0.2307
rs944725	Analyzed	17	23133698	NOS2A	NOS2A	g.IVS6+399G>A		T	C	0.3933	1	0.1979	0.2312
rs9883327	Analyzed	3	168961021	SERPINI1	SERPINI1	g.IVS1+24404G>A		A	G	0.2333	0.584	0.238	0.2312
rs7834209	Analyzed	8	6907158	DEFA5	DEFA5	g.-5528C>A		T	G	0.4932	0.0512	0.1808	0.2317
rs4940866	Analyzed	18	55155712	LMAN1	LMAN1	g.IVS10+1057T>C		G	A	0.4067	1	0.2013	0.2334
rs12721035	Analyzed	1	159457963	FCER1G	FCER1G	g.*2605T>C		T	C	0.1645	0.4142	0.1596	0.2336
rs6413453	Analyzed	1	159458940	FCER1G	APOA2	g.IVS3-4C>T		A	G	0.1667	0.4237	0.1795	0.2336
rs710462	Analyzed	3	188445824	MASP1	MASP1	g.IVS9+1476C>A		T	G	0.3421	1	0.1727	0.2357
rs2333686	Analyzed	1	181832723	NCF2	NCF2	g.-6635G>A		T	C	0.1284	0.5611	0.1833	0.2359
rs1860264	Analyzed	3	45898089	CCR9	CCR9	g.-13340A>C		C	A	0.3867	0.09647	0.1916	0.2367
rs6057649	Analyzed	20	29424119	DEFB118/DEFB119	DEFB118/DEFB119	g.IVS1-202C>A		C	A	0.3267	0.4265	0.2542	0.2404
rs4807651	Analyzed	19	4773855	TICAM1	TICAM1	g.-4465T>C		G	A	0.4467	0.3224	0.2185	0.2407
rs1400657	Analyzed	2	191541785	STAT1/STAT4	STAT1	g.*1888A>C		G	T	0.1908	0.3951	0.1693	0.241
rs3138034	Analyzed	17	29666838	CCL2/CCL7/CCL11/CCL8/CCL13/CCL1	CCL2/CCL7/CCL11/CCL8/CCL13/CCL1	g.-3795C>T		T	C	0.1	1	0.1658	0.2413
rs170963	Analyzed	21	45142574	ITGB2	ITGB2	g.IVS8+836A>G		T	C	0.2123	1	0.2405	0.2418
rs956239	Analyzed	4	187220336	TLR3	TLR3	g.-14431C>T		T	C	0.1579	1	0.1621	0.2419
rs4720004	Analyzed	7	30478744	CARD4	CARD4	g.IVS1+6003A>G		C	T	0.32	0.3983	0.2153	0.2423
rs4722986	Analyzed	7	30471048	CARD4	CARD4	g.IVS1-4866C>T		A	G	0.32	0.3983	0.2153	0.2423
rs11003134	Analyzed	10	54208165	MBL2	MBL2	g.-6763T>G		A	C	0.1102	1	0.2123	0.2426
rs8081047	Analyzed	17	29627028	CCL2/CCL7/CCL11/CCL8/CCL13/CCL1	CCL2/CCL7/CCL11/CCL8/CCL13/CCL1	g.*4093C>T		C	T	0.06667	1	0.189	0.2428
rs1422794	Analyzed	5	156869127	ADAM19	ADAM19	g.IVS8-74C>A		G	T	0.1133	0.1544	0.2068	0.2432
rs16969415	Analyzed	17	29636515	CCL2/CCL7/CCL11/CCL8/CCL13/CCL1	CCL2/CCL7/CCL11/CCL8/CCL13/CCL1	g.-425C>T		T	C	0.06667	1	0.189	0.2463
rs2287886	Analyzed	19	7718536	CD209	CD209	g.-138T>C		G	A	0.2171	1	0.1753	0.2473
rs2227589	Analyzed	1	172152839	SERPINC1	SERPINC1	g.IVS1+141G>A		T	C	0.2333	1	0.2058	0.2498
rs5741800	Analyzed	20	36369694	BPI/LBP	BPI/LBP	g.IVS2+197G>A		A	G	0.2467	0.616	0.2083	0.2503
rs7562024	Analyzed	2	191563766	STAT1/STAT4	STAT1	g.IVS11+433A>G		C	T	0.1333	0.01967	0.2072	0.2513
rs2702938	Analyzed	8	6774485	DEFA4/DEFA6	DEFA6	g.-3517G>A		T	C	0.4605	0.7451	0.1916	0.253
rs739041	Analyzed	22	35954945	RAC2	RAC2	g.IVS5-2156T>C		G	A	0.4452	0.4981	0.2076	0.253
rs4792199	Analyzed	17	7932843	ALOX12B/ALOX15B	ALOX12B	g.-1357G>A		T	C	0.3243	0.2269	0.2275	0.2533
rs13326331	Analyzed	3	46273565	CCR1/CCR3	CCR3	g.IVS1-5195C>T		T	C	0.3224	0.2255	0.1812	0.2534
rs3741240	Analyzed	11	61943118	SCGB1A1	SCGB1A1	g.Ex1+20G>A		A	G	0.42	0.1688	0.2767	0.2536
rs710469	Analyzed	3	188467212	MASP1	MASP1	g.IVS2-4010C>T		A	G	0.4324	1	0.2206	0.2538
rs2560935	Analyzed	19	56026167	KLK1/KLK15	KLK1/KLK15	g.IVS1+351A>G		T	C	0.08	0.3442	0.2313	0.2574
rs816351	Analyzed	12	116171882	NOS1	NOS1	g.IVS17-2172T>C		G	A	0.05333	1	0.1453	0.2574
rs2000467	Analyzed	22	22571533	MIF	MIF	g.*4239A>G		G	A	0.4667	0.3348	0.2105	0.258
rs2236938	Analyzed	3	45913943	CCR9	CCR9	g.IVS2+2493G>A		A	G	0.24	0.1116	0.2714	0.2596
rs6441948	Analyzed	3	46270781	CCR1/CCR3	CCR3	g.IVS1-7979A>G		A	G	0.1667	1	0.2407	0.2605
rs1701930	Analyzed	19	56111358	KLK4	KLK4	g.-5551T>C		G	A	0.07333	1	0.3044	0.262
rs1609800	Analyzed	20	36411924	BPI/LBP	BPI/LBP	g.IVS2+445T>A		T	A	0.05263	1	0.1349	0.2627
rs10498445	Analyzed	14	51810191	PTGDR	PTGDR	g.IVS1-1008C>G		G	C	0.07333	1	0.3044	0.2644
rs3788150	Analyzed	21	45158230	ITGB2	ITGB2	g.IVS1-3102A>C		T	G	0.3288	0.7231	0.245	0.2654
rs2857653	Analyzed	17	29599872	CCL2/CCL7/CCL11/CCL8/CCL13/CCL1	CCL2/CCL7/CCL11/CCL8/CCL13/CCL1	g.-6609C>T		T	C	0.1133	1	0.188	0.2692
rs2278635	Analyzed	17	7931640	ALOX12B/ALOX15B	ALOX12B	g.Ex1+107T>C		G	A	0.4178	1	0.292	0.2703
rs2070946	Analyzed	21	45165625	ITGB2	ITGB2	g.-10499A>G		C	T	0.1133	1	0.188	0.271
rs710474	Analyzed	3	188494755	MASP1	MASP1	g.-2640C>T		A	G	0.3533	0.4398	0.2469	0.2713
rs3764868	Analyzed	17	59434446	ICAM2	ICAM2	g.IVS3+290C>T		A	G	0.2733	1	0.2432	0.2718
rs836551	Analyzed	7	6408324	RAC1	RAC1	g.IVS7+141G>C		G	C	0.07333	1	0.3044	0.2724
rs1389623	Analyzed	19	6635197	C3	C3	g.IVS33+202C>T		A	G	0.07333	1	0.3044	0.2725
rs709045	Analyzed	20	29428675	DEFB118/DEFB119	DEFB118/DEFB119	g.Ex4-48A>G		T	C	0.32	0.4265	0.3219	0.2727
rs2977826	Analyzed	8	6727484	DEFB1	DEFB1	g.-4694A>G		C	T	0.1933	1	0.2888	0.273
rs7558921	Analyzed	2	191596469	STAT1/STAT4	STAT4	g.*6341G>C		C	G	0.2635	0.6562	0.2474	0.2734
rs1951626	Analyzed	1	172158724	SERPINC1	SERPINC1	g.-5703C>T		A	G	0.2867	1	0.2433	0.274
rs2779248	Analyzed	17	23151959	NOS2A	NOS2A	g.-1996G>A		C	T	0.16	0.3095	0.2849	0.2742
rs281414	Analyzed	19	10311285	ICAM3	ICAM3	g.Ex1+23C>T	p.A2A	A	G	0.07333	1	0.3044	0.2754
rs4287627	Analyzed	17	7873513	ALOX12B/ALOX15B	ALOX15B	g.-9685A>G		A	G	0.1579	0.6096	0.1843	0.2765
rs816361	Analyzed	12	116139514	NOS1	NOS1	g.IVS28+720G>C		G	C	0.3	1	0.2899	0.2772
rs4253315	Analyzed	4	187412451	KLKB1	KLKB1	g.IVS11-285C>T		T	C	0.3487	0.7059	0.2015	0.2778
rs2256023	Analyzed	7	30481516	CARD4	CARD4	g.IVS1+3231A>G		T	C	0.3	1	0.2899	0.2791
rs2529440	Analyzed	7	30478319	CARD4	CARD4	g.IVS1+6428G>A		C	T	0.3	1	0.2899	0.2791
rs11003137	Analyzed	10	54209903	MBL2	MBL2	g.-8501T>C		A	G	0.08667	0.08161	0.2087	0.2793
rs2239773	Analyzed	22	35968235	RAC2	RAC2	g.IVS1-591C>T		A	G	0.1014	1	0.3246	0.2813
rs3176766	Analyzed	19	10310778	ICAM3	ICAM3	g.IVS1-154C>T		A	G	0.1933	1	0.2484	0.2819
rs3924112	Analyzed	4	38472205	TLR1/TLR10/TLR6	TLR1	g.*2281G>A		T	C	0.4392	0.1797	0.2314	0.2833
rs6691053	Analyzed	1	172135578	SERPINC1	SERPINC1	g.*4071A>G		T	C	0.2829	1	0.2062	0.2833
rs9868455	Analyzed	3	45899215	CCR9	CCR9	g.-12214C>T		C	T	0.3784	0.17	0.2551	0.2833
rs3844283	Analyzed	3	10239480	IRAK2	IRAK2	g.Ex9-36C>G	p.L392V	G	C	0.1	1	0.1995	0.2873
rs291989	Analyzed	1	22852486	C1QA/C1QG/C1QB	C1QG	g.*5622T>C		T	C	0.3446	1	0.2582	0.2885
rs4890875	Analyzed	18	72839047	MBP	MBP	g.IVS5-8043T>C		G	A	0.26	1	0.2855	0.2891
rs3794766	Analyzed	17	23146048	NOS2A	NOS2A	g.IVS2+3805G>A		T	C	0.1267	1	0.2075	0.2902
rs735240	Analyzed	19	7719336	CD209	CD209	g.-938T>C		A	G	0.2267	0.584	0.2995	0.2906
rs235325	Analyzed	21	45135692	ITGB2	ITGB2	g.IVS11+460T>C		G	A	0.4589	0.7349	0.2394	0.2908
rs2702860	Analyzed	8	6777652	DEFA4/DEFA6	DEFA4	g.*3299G>A		T	C	0.1933	0.649	0.2693	0.2927
rs2738112	Analyzed	8	6775804	DEFA4/DEFA6	DEFA4	g.*5147C>T		A	G	0.1933	0.649	0.2693	0.2927
rs3093012	Analyzed	6	167468271	CCR6	CCR6	g.IVS1-1245A>G		A	G	0.3	0.6691	0.2723	0.293
rs12484031	Analyzed	22	35979216	RAC2	RAC2	g.-9081T>C		G	A	0.1081	0.1101	0.3031	0.2965
rs2791494	Analyzed	1	86731761	CLCA1/CLCA2	CLCA1	g.Ex11+107T>C	p.M524T	T	C	0.07432	0.2747	0.3279	0.3006
rs1152888	Analyzed	12	64891495	IRAK3	IRAK3	g.Ex5+3A>G	p.I147V	A	G	0.4133	0.4946	0.3171	0.3008
rs2838727	Analyzed	21	45140335	ITGB2	ITGB2	g.IVS8-932G>A		T	C	0.08667	1	0.333	0.3014
rs281440	Analyzed	19	10261304	ICAM1/ICAM4/ICAM5	ICAM1/ICAM4/ICAM5	g.-415G>A		G	A	0.4384	0.5095	0.2543	0.3031
rs11667699	Analyzed	19	4762654	TICAM1	TICAM1	g.*4596T>C		A	G	0.1118	0.5697	0.1996	0.3039
rs652553	Analyzed	1	57172210	C8A/C8B	C8B	g.IVS9-461A>G		T	C	0.06	1	0.2675	0.3046
rs224225	Analyzed	16	3244763	MEFV	MEFV	g.Ex2+29T>C	p.D102D	G	A	0.1382	1	0.1996	0.305
rs1837253	Analyzed	5	110429771	TSLP	TSLP	g.-5716T>C		C	T	0.3133	1	0.2711	0.3065
rs850307	Analyzed	3	188464162	MASP1	MASP1	g.IVS2-960C>A		T	G	0.1067	1	0.3008	0.3091
rs2842704	Analyzed	1	205356059	C4BPA/C4BPB	C4BPA	g.IVS4+576G>A		G	A	0.1733	1	0.3427	0.3107
rs760521	Analyzed	22	35577797	NCF4	NCF4	g.-3670G>C		C	G	0.06	1	0.2675	0.3116
rs3735520	Analyzed	7	81238875	HGF	HGF	g.-1651C>T		A	G	0.4333	0.1953	0.2559	0.3121
rs17831682	Analyzed	14	51811930	PTGDR	PTGDR	g.Ex2+732T>C		C	T	0.1419	0.3442	0.2519	0.313
rs672693	Analyzed	1	22844033	C1QA/C1QG/C1QB	C1QG	g.IVS2+749G>A		A	G	0.4867	0.5105	0.3009	0.3142
rs1008563	Analyzed	2	218735133	IL8RA/IL8RB	IL8RA	g.*1993C>T		A	G	0.2467	0.688	0.2694	0.3146
rs5746136	Analyzed	6	160023074	SOD2	SOD2	g.Ex5-330G>A		T	C	0.4595	0.7312	0.3387	0.3157
rs1899894	Analyzed	18	55183633	LMAN1	LMAN1	g.-6176A>G		T	C	0.4867	0.09647	0.3403	0.3166
rs9658490	Analyzed	12	116154681	NOS1	NOS1	g.IVS21-362G>C		G	C	0.1	1	0.3556	0.3166
rs1551443	Analyzed	2	191704763	STAT1/STAT4	STAT4	g.IVS3+14821A>G		T	C	0.2867	1	0.3116	0.3194
rs1428469	Analyzed	5	66525849	CD180	CD180	g.IVS1+2287A>G		C	T	0.1986	1	0.2849	0.3209
rs703817	Analyzed	12	55776095	STAT6	STAT6	g.Ex22-638G>A		T	C	0.2394	0.693	0.2943	0.3218
rs11080372	Analyzed	17	31427152	CCL18	CCL18	g.*4637A>G		G	A	0.4013	0.7303	0.2436	0.3226
rs2373929	Analyzed	7	150345745	NOS3	ATG9B	g.IVS8+146C>T		A	G	0.4533	0.5214	0.2768	0.323
rs11085101	Analyzed	19	4762956	TICAM1	TICAM1	g.*4294T>C		G	A	0.4408	0.5024	0.2429	0.325
rs3864097	Analyzed	3	188433329	MASP1	MASP1	g.IVS12+1237C>T		G	A	0.3243	0.2989	0.324	0.325
rs4948674	Analyzed	10	45265696	ALOX5	ALOX5	g.*4554A>C		A	C	0.1513	0.3142	0.2119	0.3267
rs17433222	Analyzed	1	22851233	C1QA/C1QG/C1QB	C1QG	g.*4369A>G		A	G	0.2267	0.584	0.2633	0.3272
rs3769618	Analyzed	2	31458951	XDH	XDH	g.IVS11+420G>A		T	C	0.3	0.03311	0.2861	0.3284
rs3782522	Analyzed	12	107548854	SELPLG	SELPLG	g.IVS1+2791G>A		T	C	0.4145	1	0.2484	0.3312
rs9916382	Analyzed	17	7896453	ALOX12B/ALOX15B	ALOX15B	g.*3844C>T		C	T	0.4933	1	0.2751	0.3319
rs3746732	Analyzed	20	23013342	C1QR1	C1QR1	g.Ex1-447T>C	p.R496R	A	G	0.2119	0.6458	0.3188	0.332
rs4259650	Analyzed	1	205360119	C4BPA/C4BPB	C4BPA	g.IVS4-3771A>G		A	G	0.2133	0.6516	0.349	0.3327
rs5741798	Analyzed	20	36366212	BPI/LBP	BPI/LBP	g.IVS1+43C>G		G	C	0.4013	0.7535	0.2564	0.3368
rs4238087	Analyzed	12	42450572	IRAK4	IRAK4	g.IVS2-718A>G		G	A	0.09333	1	0.2973	0.3376
rs1048709	Analyzed	6	32022914	C2	BF	g.Ex3-35A>G	p.R150R	A	G	0.2933	0.6691	0.3244	0.3386
rs1560160	Analyzed	5	66508893	CD180	CD180	g.*5547C>A		T	G	0.3108	0.4706	0.3164	0.3391
rs1357134	Analyzed	3	188462462	MASP1	MASP1	g.IVS3+563T>C		G	A	0.3933	0.2967	0.3294	0.3412
rs3746972	Analyzed	21	45152263	ITGB2	ITGB2	g.IVS3-825T>C		G	A	0.08	1	0.2264	0.3417
rs352162	Analyzed	3	52228009	TLR9	TLR9	g.*2263G>A		C	T	0.4407	0.2342	0.3444	0.3428
rs8178407	Analyzed	17	53699655	MPO	MPO	g.IVS11-54A>G		G	A	0.2095	0.2992	0.3748	0.3432
rs3093002	Analyzed	6	167474050	CCR6	CCR6	g.*3216A>G		A	G	0.3882	1	0.2755	0.3453
rs4656994	Analyzed	1	159446501	FCER1G	NDUFS2	g.IVS7-24G>A		A	G	0.3618	0.129	0.2755	0.3461
rs4767535	Analyzed	12	116289258	NOS1	NOS1	g.-36000G>A		T	C	0.4267	0.7416	0.373	0.3461
rs6531670	Analyzed	4	38511417	TLR1/TLR10/TLR6	TLR6	g.-3927G>A		C	T	0.2333	0.304	0.341	0.3463
rs12129787	Analyzed	1	159759211	FCGR2A	HSPA6	g.-1861C>T		C	T	0.4662	0.17	0.3962	0.3465
rs4683147	Analyzed	3	45923268	CCR9	CCR9	g.*4873A>G		G	A	0.3699	0.08349	0.3099	0.3504
rs4853533	Analyzed	2	191545016	STAT1/STAT4	STAT1	g.IVS24-1328A>G		C	T	0.2895	0.3979	0.2613	0.3545
rs17129266	Analyzed	1	86741698	CLCA1/CLCA2	CLCA1	g.*3381C>G		C	G	0.2067	0.2861	0.37	0.356
rs1907635	Analyzed	3	46273120	CCR1/CCR3	CCR3	g.IVS1-5640T>C		T	C	0.3684	0.5089	0.263	0.3561
rs13149271	Analyzed	4	71371320	MUC7	MUC7	g.-3007A>G		G	A	0.1533	0.565	0.435	0.358
rs4253311	Analyzed	4	187411677	KLKB1	KLKB1	g.IVS11-1059A>G		A	G	0.3421	1	0.2604	0.3594
rs8074003	Analyzed	17	73876088	SOCS3	SOCS3	g.-9316G>A		T	C	0.18	0.1697	0.3144	0.3616
rs3775302	Analyzed	4	187414808	KLKB1	KLKB1	g.IVS13-566A>G		G	A	0.3553	1	0.2704	0.3635
rs10845008	Analyzed	12	7160965	C1RL	C1RL	g.-7912G>A		T	C	0.4865	1	0.3169	0.3642
rs3794834	Analyzed	18	72849085	MBP	MBP	g.IVS5+1708G>C		G	C	0.1824	0.5694	0.3529	0.3648
rs167769	Analyzed	12	55790042	STAT6	STAT6	g.IVS1+1137G>A		T	C	0.2397	1	0.3188	0.3665
rs3771300	Analyzed	2	191543841	STAT1/STAT4	STAT1	g.IVS24-153A>C		G	T	0.3026	1	0.2746	0.368
rs1474552	Analyzed	21	45161718	ITGB2	ITGB2	g.IVS1+3446A>G		C	T	0.2105	0.1907	0.2775	0.3684
rs483589	Analyzed	12	116265914	NOS1	NOS1	g.IVS1-12237C>T		A	G	0.1959	0.5595	0.3412	0.3686
rs9320031	Analyzed	18	59711631	SERPINB2	SERPINB2	g.IVS2+1805C>A		A	C	0.4267	0.7416	0.3424	0.3688
rs918608	Analyzed	5	41188446	C6	C6	g.IVS15+1223T>C		G	A	0.4276	0.3162	0.288	0.369
rs2758331	Analyzed	6	160025060	SOD2	SOD2	g.IVS4+816G>T		A	C	0.06	1	0.3218	0.3693
rs2659058	Analyzed	19	56017918	KLK1/KLK15	KLK1/KLK15	g.IVS1+853G>A		C	T	0.24	0.2353	0.3861	0.3698
rs9880761	Analyzed	3	188423991	MASP1	MASP1	g.IVS15-315C>T		G	A	0.1081	0.5035	0.2942	0.3703
rs3917018	Analyzed	1	100974810	VCAM1	VCAM1	g.IVS8-1457A>G		G	A	0.48	0.09725	0.2878	0.3705
rs10737548	Analyzed	1	159760169	FCGR2A	HSPA6	g.-903C>T		T	C	0.06667	1	0.2364	0.3716
rs4861699	Analyzed	4	187221734	TLR3	TLR3	g.-13033A>G		A	G	0.38	1	0.3349	0.3717
rs8072199	Analyzed	17	23140975	NOS2A	NOS2A	g.IVS2-134G>A		T	C	0.08108	1	0.286	0.3718
rs10432782	Analyzed	21	31958262	SOD1	SOD1	g.IVS2+192T>G		G	T	0.4797	0.5194	0.4266	0.3721
rs2833475	Analyzed	21	31966691	SOD1	SOD1	g.IVS19-153T>C		G	A	0.4797	0.5194	0.4266	0.3722
rs7574865	Analyzed	2	191672878	STAT1/STAT4	STAT4	g.IVS3-23582A>C		T	G	0.3067	0.3983	0.3808	0.3733
rs11720718	Analyzed	3	188424123	MASP1	MASP1	g.IVS15-447C>T		A	G	0.2067	0.565	0.351	0.3738
rs3212741	Analyzed	19	17812178	JAK3	JAK3	g.IVS8-28C>T		A	G	0.05405	1	0.4065	0.3739
rs10489624	Analyzed	1	57122202	C8A/C8B	C8A	g.IVS6+260T>C		C	T	0.3816	0.4729	0.2869	0.3754
rs8069976	Analyzed	17	73861445	SOCS3	SOCS3	g.*4648G>T		A	C	0.28	0.4507	0.3542	0.3758
rs4526381	Analyzed	8	6776778	DEFA4/DEFA6	DEFA4	g.*4173G>A		C	T	0.1959	0.2154	0.3234	0.3791
rs7656411	Analyzed	4	154847105	TLR2	TLR2	g.*1240G>T		T	G	0.3947	1	0.2936	0.3799
rs1468673	Analyzed	9	122849711	C5	C5	g.IVS1-1229G>A		C	T	0.1689	0.5146	0.34	0.3819
rs2306950	Analyzed	4	71374027	MUC7	MUC7	g.IVS1-286A>T		T	A	0.1667	1	0.3046	0.3821
rs197589	Analyzed	19	56009947	KLK1/KLK15	KLK1/KLK15	g.*4314C>G		C	G	0.25	0.2217	0.3314	0.3829
rs2304908	Analyzed	17	7924694	ALOX12B/ALOX15B	ALOX12B	g.IVS5+7C>G		C	G	0.3553	0.3099	0.2861	0.3843
rs12953981	Analyzed	18	55160436	LMAN1	LMAN1	g.IVS8-3271G>A		C	T	0.4933	0.185	0.422	0.3851
rs9658354	Analyzed	12	116208608	NOS1	NOS1	g.IVS5-154T>A		T	A	0.4933	0.745	0.3966	0.3862
rs7026551	Analyzed	9	122772954	C5	C5	g.IVS31-604T>G		C	A	0.1645	0.4929	0.2727	0.3866
rs10900213	Analyzed	10	45224720	ALOX5	ALOX5	g.IVS3-2925G>T		G	T	0.3933	1	0.3251	0.3878
rs17054724	Analyzed	5	156921698	ADAM19	ADAM19	g.IVS3+2261G>A		T	C	0.2603	0.6562	0.3343	0.3879
rs4674261	Analyzed	2	218713254	IL8RA/IL8RB	IL8RB	g.*4401C>G		C	G	0.3	1	0.3368	0.3896
rs5741812	Analyzed	20	36407413	BPI/LBP	BPI/LBP	g.-920A>T		T	A	0.4933	0.5088	0.422	0.3917
rs4077759	Analyzed	11	1095976	MUC6	MUC6	g.-69263G>A		C	T	0.2333	1	0.3613	0.3927
rs2749817	Analyzed	20	23007255	C1QR1	C1QR1	g.*5331G>A		T	C	0.3667	0.1886	0.3301	0.3937
rs3093009	Analyzed	6	167469467	CCR6	CCR6	g.IVS1-49A>G		G	A	0.1067	1	0.2858	0.3944
rs9842595	Analyzed	3	45897695	CCR9	CCR9	g.-13734T>G		T	G	0.08108	1	0.4634	0.3947
rs13434451	Analyzed	4	24396002	SOD3	SOD3	g.-14239A>G		G	A	0.08	1	0.2692	0.3951
rs13029532	Analyzed	2	191584146	STAT1/STAT4	STAT1	g.IVS2-1171G>T		C	A	0.1959	0.5595	0.3645	0.3972
rs10490361	Analyzed	2	31407053	XDH	XDH	g.*5274G>C		C	G	0.4667	1	0.4269	0.3978
rs7194886	Analyzed	16	49282694	CARD15	CARD15	g.-5961C>T		T	C	0.1351	1	0.365	0.4005
rs17198395	Analyzed	12	7141689	C1RL	C1RL	g.IVS5-788G>A		T	C	0.16	0.5035	0.3899	0.4007
rs11536889	Analyzed	9	119517952	TLR4	TLR4	g.*1204C>G		C	G	0.18	1	0.356	0.4024
rs206860	Analyzed	2	31476308	XDH	XDH	g.IVS4-1239C>T		A	G	0.4932	0.7464	0.3966	0.4029
rs7790870	Analyzed	7	81242848	HGF	HGF	g.-5624G>C		C	G	0.2333	1	0.341	0.403
rs5743867	Analyzed	11	1284927	TOLLIP	TOLLIP	g.IVS1+2345C>T		G	A	0.22	0.3095	0.3361	0.404
rs389512	Analyzed	6	32055573	C2	STK19	g.IVS5+264G>C		C	G	0.1733	0.5733	0.4017	0.4049
rs1353939	Analyzed	12	116159736	NOS1	NOS1	g.IVS20-2790G>A		T	C	0.277	0.7119	0.3471	0.4058
rs5743369	Analyzed	7	30434709	CARD4	CARD4	g.IVS13+806A>G		C	T	0.1	1	0.3556	0.41
rs7952385	Analyzed	11	1099049	MUC6	MUC6	g.-72336A>G		T	C	0.2133	1	0.3884	0.4131
rs344548	Analyzed	19	6636817	C3	C3	g.IVS29+318C>G		G	C	0.06	1	0.3661	0.4134
rs2163059	Analyzed	2	31456638	XDH	XDH	g.IVS12-292T>C		G	A	0.3421	0.05878	0.3201	0.4142
rs16833177	Analyzed	2	191595877	STAT1/STAT4	STAT4	g.*6933G>A		C	T	0.3289	0.7261	0.3246	0.4156
rs4383207	Analyzed	17	7877007	ALOX12B/ALOX15B	ALOX15B	g.-6191A>G		G	A	0.3947	0.7402	0.3215	0.4161
rs3793964	Analyzed	11	1258558	TOLLIP	TOLLIP	g.IVS5-3499A>G		C	T	0.4746	1	0.3489	0.4184
rs5741806	Analyzed	20	36386511	BPI/LBP	BPI/LBP	g.IVS8-79C>T		T	C	0.4867	0.745	0.4895	0.4206
rs324015	Analyzed	12	55776367	STAT6	STAT6	g.Ex22+445A>G		C	T	0.4527	0.1797	0.366	0.4224
rs1107009	Analyzed	19	4764686	TICAM1	TICAM1	g.*2564C>G		G	C	0.4595	1	0.3403	0.4232
rs710459	Analyzed	3	188443176	MASP1	MASP1	g.IVS10+790C>T		G	A	0.4521	1	0.4223	0.4234
rs3093077	Analyzed	1	157946260	CRP	CRP	g.*3678G>T		C	A	0.1267	0.1544	0.4455	0.4237
rs12151125	Analyzed	19	6475406	TNFSF9	TNFSF9	g.-6641G>T		G	T	0.26	0.649	0.4189	0.4242
rs3027208	Analyzed	17	7955033	ALOXE3	ALOXE3	g.IVS7+369G>A		T	C	0.4189	1	0.4585	0.4287
rs4957361	Analyzed	5	41021361	C7	C7	g.*3928C>T		C	T	0.3649	0.49	0.3793	0.4287
rs854477	Analyzed	17	31427271	CCL18	CCL18	g.*4756A>G		A	G	0.3867	1	0.4335	0.4309
rs2282557	Analyzed	18	72854154	MBP	MBP	g.Ex4-428G>A		T	C	0.3836	0.1805	0.3763	0.4349
rs3805715	Analyzed	5	41194246	C6	C6	g.IVS13+287T>C		G	A	0.4133	0.2932	0.4288	0.4352
rs3788523	Analyzed	22	35599453	NCF4	NCF4	g.IVS7+1040T>C		T	C	0.3514	0.2756	0.4268	0.4357
rs379527	Analyzed	19	6627442	C3	C3	g.*1450G>T		C	A	0.44	0.1886	0.4397	0.4361
rs7215658	Analyzed	17	7950889	ALOXE3	ALOXE3	g.IVS12+1622G>T		A	C	0.4459	0.7312	0.4889	0.4379
rs3024904	Analyzed	2	191603447	STAT1/STAT4	STAT4	g.IVS23+496A>T		A	T	0.2733	1	0.4048	0.4394
rs235329	Analyzed	21	45138868	ITGB2	ITGB2	g.IVS9+446A>C		G	T	0.38	0.3218	0.3722	0.4405
rs779905	Analyzed	3	10243017	IRAK2	IRAK2	g.IVS9-38C>T		C	T	0.3051	1	0.434	0.4413
rs3935951	Analyzed	17	7915141	ALOX12B/ALOX15B	ALOX12B	g.*1672A>G		T	C	0.1824	1	0.4172	0.4414
rs875890	Analyzed	3	45920291	CCR9	CCR9	g.*1896T>A		A	T	0.3	0.007984	0.3875	0.4427
rs3809882	Analyzed	17	7940314	ALOXE3	ALOXE3	g.Ex15-372A>C		T	G	0.3378	1	0.4266	0.4435
rs2282574	Analyzed	18	72867293	MBP	MBP	g.IVS3-9081T>C		A	G	0.16	1	0.3899	0.444
rs4240691	Analyzed	8	6908814	DEFA5	DEFA5	g.-7184G>A		C	T	0.473	0.3292	0.3619	0.4443
rs3181027	Analyzed	17	59430241	ICAM2	ICAM2	g.*3597C>A		T	G	0.2241	1	0.3993	0.4456
rs1078625	Analyzed	19	7658063	FCER2	FCER2	g.*2015T>C		G	A	0.3684	0.7377	0.3472	0.446
rs4413571	Analyzed	5	41223714	C6	C6	g.IVS5-1647A>T		A	T	0.2434	0.1697	0.3358	0.446
rs836554	Analyzed	7	6411760	RAC1	RAC1	g.*3157C>T		C	T	0.2667	0.4496	0.38	0.4472
rs2255929	Analyzed	17	23112094	NOS2A	NOS2A	g.IVS23-197A>T		T	A	0.3176	1	0.4569	0.4492
rs171094	Analyzed	19	6678365	C3	C3	g.*2719T>C		G	A	0.3919	0.2989	0.4506	0.4498
rs1554973	Analyzed	9	119520633	TLR4	TLR4	g.*3885C>T		C	T	0.1467	1	0.4245	0.45
rs11057065	Analyzed	12	8099511	FOXJ2	FOXJ2	g.*2797C>T		T	C	0.2733	1	0.4353	0.4535
rs753733	Analyzed	19	7675566	FCER2	FCER2	g.-4919T>C		A	G	0.125	0.3361	0.4454	0.4535
rs11693480	Analyzed	2	191665940	STAT1/STAT4	STAT4	g.IVS3-16644G>T		C	A	0.4733	0.1865	0.5096	0.454
rs7298903	Analyzed	12	116231593	NOS1	NOS1	g.IVS3+2061A>G		C	T	0.2697	0.3951	0.3522	0.457
rs641714	Analyzed	1	57168338	C8A/C8B	C8B	g.IVS11-519C>G		C	G	0.3667	0.02844	0.4255	0.4573
rs3815623	Analyzed	3	188441736	MASP1	MASP1	g.IVS11+227C>T		G	A	0.3041	1	0.4533	0.4575
rs1855025	Analyzed	6	167457584	CCR6	CCR6	g.IVS1+883A>G		G	A	0.3699	0.7333	0.4025	0.4577
rs2455314	Analyzed	5	40975048	C7	C7	g.IVS6+1499A>G		G	A	0.4267	0.4878	0.4346	0.4579
rs4948671	Analyzed	10	45200062	ALOX5	ALOX5	g.IVS2+1927C>T		C	T	0.1267	1	0.4187	0.4626
rs2117341	Analyzed	21	45126821	ITGB2	ITGB2	g.*3889C>T		A	G	0.1316	1	0.3282	0.4641
rs2701652	Analyzed	12	64867144	IRAK3	IRAK3	g.-2202G>C		C	G	0.09459	1	0.4801	0.4646
rs10189819	Analyzed	2	191716994	STAT1/STAT4	STAT4	g.IVS3+2590A>G		C	T	0.08667	1	0.3885	0.4647
rs8056611	Analyzed	16	49325148	CARD15	CARD15	g.*1916A>G		G	A	0.3733	0.1886	0.454	0.4648
rs12707453	Analyzed	7	81207355	HGF	HGF	g.IVS8+2588T>C		G	A	0.34	0.4398	0.4169	0.4652
rs7528380	Analyzed	1	172162776	SERPINC1	SERPINC1	g.-9755T>C		A	G	0.3311	0.7309	0.4483	0.4653
rs12711521	Analyzed	1	11013503	MASP2	MASP2	g.Ex10+24G>T	p.D371Y	C	A	0.3867	0.7417	0.4455	0.4657
rs4135385	Analyzed	3	41254444	CTNNB1	CTNNB1	g.IVS13-67A>G		A	G	0.4342	0.000339	0.3694	0.4661
rs353547	Analyzed	3	52243906	TLR9	PTK9L	g.IVS2+179A>G		T	C	0.4257	0.4878	0.4134	0.4664
rs2076059	Analyzed	1	167965545	SELE	SELE	g.IVS5-107G>A		T	C	0.1267	1	0.4187	0.4669
rs624298	Analyzed	1	57147122	C8A/C8B	C8A	g.IVS9+748A>G		A	G	0.09333	1	0.5169	0.4674
rs9658282	Analyzed	12	116251847	NOS1	NOS1	g.IVS2+686T>A		A	T	0.4013	0.05473	0.3616	0.468
rs9842716	Analyzed	3	46257178	CCR1/CCR3	CCR3	g.-24475A>G		A	G	0.274	1	0.4752	0.4695
rs12984870	Analyzed	19	7670157	FCER2	FCER2	g.IVS2-417T>C		G	A	0.4467	0.3218	0.5004	0.4717
rs4610776	Analyzed	8	6902087	DEFA5	DEFA5	g.-457T>A		T	A	0.06081	1	0.3267	0.472
rs10173099	Analyzed	2	191575577	STAT1/STAT4	STAT1	g.IVS5-1443G>A		C	T	0.4605	1	0.3841	0.4727
rs2508443	Analyzed	11	57134568	SERPING1	SERPING1	g.IVS6-1198G>T		T	G	0.1267	0.5733	0.4187	0.4728
rs207432	Analyzed	2	31407491	XDH	XDH	g.*4836T>G		C	A	0.3224	1	0.3723	0.4731
rs7027797	Analyzed	9	122811620	C5	C5	g.IVS17-1023A>G		C	T	0.07432	1	0.377	0.4751
rs268922	Analyzed	19	56114428	KLK4	KLK4	g.-8621G>T		A	C	0.06	1	0.3061	0.4753
rs2907749	Analyzed	7	30452266	CARD4	CARD4	g.IVS9+16T>C		G	A	0.3	0.3983	0.4505	0.4754
rs2290065	Analyzed	17	35969886	CCR7	CCR7	g.IVS1-1166C>T		A	G	0.2467	1	0.4825	0.4768
rs4648127	Analyzed	4	103754951	NFKB1	NFKB1	g.IVS23+1167C>T		T	C	0.05333	1	0.4306	0.4778
rs2511990	Analyzed	11	57119284	SERPING1	LOC390183	g.NC_-18210C>T		A	G	0.137	0.5656	0.4871	0.4805
rs10162089	Analyzed	13	30214738	ALOX5AP	ALOX5AP	g.IVS1-1459G>A		A	G	0.24	0.1643	0.4789	0.4807
rs8135343	Analyzed	22	35957791	RAC2	RAC2	g.IVS4+127C>T		A	G	0.3446	0.4931	0.4645	0.482
rs4247362	Analyzed	17	7885267	ALOX12B/ALOX15B	ALOX15B	g.IVS3-1145T>C		C	T	0.3667	0.7119	0.4686	0.4831
rs3917683	Analyzed	1	167857997	SELP	SELP	g.IVS1-2916A>G		C	T	0.375	0.5089	0.3786	0.4832
rs3917688	Analyzed	1	167857704	SELP	SELP	g.IVS1-2623G>A		T	C	0.375	0.5089	0.3786	0.4832
rs3794842	Analyzed	18	72846105	MBP	MBP	g.IVS5+4688G>A		T	C	0.05333	1	0.4306	0.4845
rs13035504	Analyzed	2	191537598	STAT1/STAT4	GLS	g.Ex18-920C>G		G	C	0.06	1	0.3061	0.4853
rs6671947	Analyzed	1	206003114	MCP	MCP	g.IVS5+1700C>G		G	C	0.08108	1	0.503	0.4862
rs1152912	Analyzed	12	64920175	IRAK3	IRAK3	g.IVS8-4358A>G		A	G	0.38	0.4683	0.4897	0.4874
rs17660901	Analyzed	18	72863006	MBP	MBP	g.IVS3-4794G>C		G	C	0.22	1	0.5038	0.4876
rs13126816	Analyzed	4	187231172	TLR3	TLR3	g.IVS1-3589G>A		A	G	0.1184	0.5697	0.3422	0.4885
rs11685878	Analyzed	2	191717700	STAT1/STAT4	STAT4	g.IVS3+1884A>G		T	C	0.3618	0.7119	0.3855	0.4891
rs7653908	Analyzed	4	38458616	TLR1/TLR10/TLR6	TLR10	g.IVS1+2321C>G		C	G	0.3882	0.7469	0.3855	0.4894
rs901681	Analyzed	10	45254535	ALOX5	ALOX5	g.IVS7-1349T>G		T	G	0.375	1	0.3929	0.4909
rs10168266	Analyzed	2	191644049	STAT1/STAT4	STAT4	g.IVS5-1307G>A		T	C	0.2566	1	0.384	0.4916
rs5744329	Analyzed	1	86713303	CLCA1/CLCA2	CLCA1	g.IVS4+1156G>A		A	G	0.3224	0.6911	0.387	0.492
rs2107538	Analyzed	17	31231893	CCL5	CCL5	g.-470G>A		T	C	0.3933	1	0.4627	0.494
rs17682491	Analyzed	20	23005867	C1QR1	C1QR1	g.*6719G>A		T	C	0.1316	0.3361	0.3554	0.4947
rs4853540	Analyzed	2	191625562	STAT1/STAT4	STAT4	g.IVS14+1899A>C		T	G	0.1867	1	0.4548	0.4978
rs884847	Analyzed	12	116207996	NOS1	NOS1	g.IVS6+296T>C		A	G	0.1351	0.5694	0.5327	0.4986
rs11672613	Analyzed	19	6656246	C3	C3	g.IVS17+1841A>G		C	T	0.4667	0.742	0.4391	0.4997
rs2980924	Analyzed	8	6719403	DEFB1	DEFB1	g.IVS1+3326T>C		A	G	0.1447	1	0.3666	0.5023
rs16833260	Analyzed	2	191679810	STAT1/STAT4	STAT4	g.IVS3-30514C>G		G	C	0.4867	0.3282	0.524	0.5036
rs187451	Analyzed	5	39338687	C9	C9	g.IVS9+3789A>C		G	T	0.2	0.565	0.4208	0.5039
rs2659079	Analyzed	19	56113303	KLK4	KLK4	g.-7496T>C		A	G	0.07237	1	0.328	0.5092
rs3750919	Analyzed	11	1249407	TOLLIP	TOLLIP	g.*5437C>T		A	G	0.3219	0.6924	0.511	0.5113
rs324013	Analyzed	12	55796928	STAT6	STAT6	g.-8599G>A		T	C	0.3581	0.2999	0.4663	0.5116
rs3775292	Analyzed	4	187240019	TLR3	TLR3	g.IVS3-449C>G		C	G	0.07333	1	0.3516	0.5122
rs12187501	Analyzed	5	156910376	ADAM19	ADAM19	g.IVS3-12799G>A		T	C	0.3224	1	0.4136	0.5135
rs4686870	Analyzed	3	188500535	MASP1	MASP1	g.-8420G>A		T	C	0.4797	0.5001	0.6017	0.5145
rs11851178	Analyzed	14	54571882	SOCS4	SOCS4	g.IVS2+3423A>G		G	A	0.2671	0.2196	0.4896	0.5148
rs7825750	Analyzed	8	6867213	DEFA3	DEFA3	g.-5430G>A		C	T	0.3224	1	0.4136	0.5149
rs713016	Analyzed	3	10253696	IRAK2	IRAK2	g.IVS11-1736C>T		C	T	0.2568	0.4265	0.4536	0.5152
rs4704883	Analyzed	5	156921165	ADAM19	ADAM19	g.IVS3+2794C>A		T	G	0.4733	0.5105	0.498	0.5156
rs9676140	Analyzed	18	72831987	MBP	MBP	g.IVS5-983G>C		G	C	0.4527	0.3276	0.5861	0.5157
rs3810194	Analyzed	19	54719852	FCGRT	FCGRT	g.IVS4+7T>C		C	T	0.09459	0.3528	0.5437	0.5167
rs2070902	Analyzed	1	159454289	FCER1G	FCER1G	g.IVS1-111C>T		C	T	0.4863	0.1037	0.534	0.5177
rs6556091	Analyzed	5	156933903	ADAM19	ADAM19	g.IVS1+1282T>A		T	A	0.08108	0.02079	0.5351	0.5185
rs7574608	Analyzed	2	191618109	STAT1/STAT4	STAT4	g.IVS14-3990T>A		T	A	0.1892	1	0.5025	0.519
rs4674257	Analyzed	2	218697019	IL8RA/IL8RB	IL8RB	g.-10750A>G		G	A	0.3716	1	0.4786	0.5204
rs3734029	Analyzed	5	156833328	ADAM19	ICHTHYIN	g.Ex6-977T>C		T	C	0.3986	0.4943	0.4557	0.5213
rs3798315	Analyzed	6	167464699	CCR6	CCR6	g.IVS1-4817C>T		T	C	0.07333	1	0.3516	0.5214
rs2664593	Analyzed	17	4491881	ALOX15	ALOX15	g.-185C>G		G	C	0.1974	0.2739	0.3955	0.5217
rs434473	Analyzed	17	6845658	ALOX12	ALOX12	g.Ex8+14A>G	p.N322S	G	A	0.4145	1	0.422	0.5221
rs7215288	Analyzed	17	7950629	ALOXE3	ALOXE3	g.IVS12+1882G>A		T	C	0.4257	1	0.5895	0.5221
rs12525076	Analyzed	6	32115438	CYP21A2	CYP21A2	g.IVS5+35A>G		A	G	0.2373	0.3489	0.4719	0.5223
rs4792214	Analyzed	17	7942728	ALOXE3	ALOXE3	g.IVS14-1879G>A		C	T	0.07333	1	0.3516	0.5232
rs3024861	Analyzed	2	191632851	STAT1/STAT4	STAT4	g.IVS10-1111A>T		T	A	0.46	1	0.5266	0.524
rs3136671	Analyzed	3	46218179	CCR1/CCR3	CCR1	g.*1561A>G		T	C	0.2027	1	0.5135	0.5252
rs1979671	Analyzed	3	46249219	CCR1/CCR3	CCR3	g.-32434T>C		C	T	0.1974	0.6518	0.3955	0.5297
rs2440129	Analyzed	17	6847295	ALOX12	ALOX12	g.IVS8+1441C>G		C	G	0.2667	1	0.5313	0.5303
rs4656993	Analyzed	1	159442761	FCER1G	NDUFS2	g.IVS3-60A>G		A	G	0.08	0.2677	0.5343	0.5312
rs7249320	Analyzed	19	7669045	FCER2	FCER2	g.IVS4+197G>T		A	C	0.1467	0.5611	0.5608	0.5317
rs940339	Analyzed	2	228393506	CCL20	CCL20	g.*3462T>C		C	T	0.2	1	0.4427	0.5328
rs10438740	Analyzed	17	7413608	SENP3	SENP3	g.IVS7-790G>A		A	G	0.4467	0.7417	0.5116	0.5329
rs206811	Analyzed	2	31490419	XDH	XDH	g.IVS1+576T>C		G	A	0.3467	0.7261	0.5812	0.533
rs3785898	Analyzed	17	37768646	STAT3/STAT5A	STAT3/STAT5A	g.IVS1-14563G>T		A	C	0.3581	0.7081	0.5466	0.533
rs6503695	Analyzed	17	37753059	STAT3/STAT5A	STAT3/STAT5A	g.IVS2-802A>G		C	T	0.3581	0.7081	0.5466	0.533
rs7614342	Analyzed	3	45915821	CCR9	CCR9	g.IVS2-1485A>T		T	A	0.2905	0.01721	0.5104	0.533
rs7232502	Analyzed	18	72856606	MBP	MBP	g.Ex4+1607G>A		C	T	0.4934	1	0.4348	0.5335
rs13073976	Analyzed	3	46261667	CCR1/CCR3	CCR3	g.IVS1+2634T>C		C	T	0.06081	1	0.6582	0.5345
rs12624843	Analyzed	20	36422510	BPI/LBP	BPI/LBP	g.IVS5-262G>A		G	A	0.2394	0.2081	0.5318	0.5362
rs11086565	Analyzed	20	36421344	BPI/LBP	BPI/LBP	g.IVS5-1428A>G		G	A	0.06081	1	0.6582	0.5365
rs441019	Analyzed	21	45126457	ITGB2	ITGB2	g.*4253T>A		A	T	0.4803	0.05565	0.4451	0.5377
rs12949918	Analyzed	17	37779799	STAT3/STAT5A	STAT3/STAT5A	g.IVS1+14024A>G		C	T	0.3986	0.2825	0.5588	0.5379
rs7217655	Analyzed	17	37749550	STAT3/STAT5A	STAT3/STAT5A	g.IVS4+1553G>A		T	C	0.3986	0.2825	0.5588	0.5379
rs2304240	Analyzed	19	10310392	ICAM3	ICAM3	g.Ex2-35T>C	p.S103S	A	G	0.1579	0.4929	0.3982	0.5381
rs6865420	Analyzed	5	41194329	C6	C6	g.IVS13+204T>G		A	C	0.2533	0.06558	0.5534	0.5386
rs1209087	Analyzed	14	54562970	SOCS4	WDHD1	g.IVS2+209G>A		C	T	0.2838	0.1163	0.5398	0.5395
rs7219450	Analyzed	17	7926403	ALOX12B/ALOX15B	ALOX12B	g.IVS2-1173T>A		A	T	0.4867	1	0.5341	0.5395
rs4804802	Analyzed	19	7713610	CD209	CD209	g.Ex7+517T>C		A	G	0.3	0.7119	0.511	0.5397
rs6695096	Analyzed	1	11017626	MASP2	MASP2	g.IVS8-76G>A		C	T	0.18	0.1358	0.5039	0.5399
rs11043785	Analyzed	12	7143227	C1RL	C1RL	g.IVS5+197G>A		C	T	0.48	0.5088	0.6067	0.54
rs2239775	Analyzed	22	35967787	RAC2	RAC2	g.IVS1-143G>T		A	C	0.1842	0.2056	0.4111	0.5402
rs1005510	Analyzed	11	57123798	SERPING1	SERPING1	g.IVS2-130C>T		C	T	0.24	0.07637	0.5858	0.5412
rs3027300	Analyzed	17	7929718	ALOX12B/ALOX15B	ALOX12B	g.IVS2+341T>G		C	A	0.1892	1	0.5198	0.545
rs1467199	Analyzed	2	191588747	STAT1/STAT4	STAT1	g.-5772G>C		G	C	0.4122	0.1961	0.4963	0.5461
rs9675994	Analyzed	18	72835447	MBP	MBP	g.IVS5-4443G>A		T	C	0.4267	0.7321	0.5743	0.5463
rs5745616	Analyzed	7	81236292	HGF	HGF	g.IVS1+844G>A		T	C	0.3581	0.7081	0.5218	0.547
rs4360988	Analyzed	17	7926534	ALOX12B/ALOX15B	ALOX12B	g.IVS2-1304C>A		G	T	0.4671	0.7402	0.444	0.5473
rs11786591	Analyzed	8	75078898	LY96	LY96	g.IVS1-687C>T		T	C	0.2368	0.6489	0.4232	0.5475
rs1864414	Analyzed	10	45190567	ALOX5	ALOX5	g.IVS1+684T>G		G	T	0.2113	1	0.5158	0.5478
rs2472614	Analyzed	17	5281774	C1QBP	C1QBP	g.IVS2+393C>G		G	C	0.3333	0.06521	0.582	0.5492
rs1789256	Analyzed	18	72816039	MBP	MBP	g.*5331G>A		C	T	0.2838	0.01443	0.5545	0.5496
rs3924264	Analyzed	1	159445308	FCER1G	NDUFS2	g.IVS4-299T>C		T	C	0.4467	0.09746	0.541	0.552
rs3829223	Analyzed	11	1256982	TOLLIP	TOLLIP	g.IVS5-1923G>A		T	C	0.3305	0.4068	0.5167	0.5532
rs4769055	Analyzed	13	30207830	ALOX5AP	ALOX5AP	g.IVS1+18C>A		A	C	0.4467	1	0.4988	0.5538
rs3805221	Analyzed	5	41001075	C7	C7	g.IVS14+343C>T		T	C	0.3224	0.6911	0.4479	0.5555
rs10060687	Analyzed	5	156903374	ADAM19	ADAM19	g.IVS3-5797C>T		A	G	0.3333	0.7119	0.5919	0.5569
rs1363618	Analyzed	5	156902929	ADAM19	ADAM19	g.IVS3-5352T>G		C	A	0.3333	0.7119	0.5919	0.5569
rs2075938	Analyzed	22	35596268	NCF4	NCF4	g.IVS4-135A>G		A	G	0.3467	0.7119	0.5812	0.5574
rs4789763	Analyzed	17	77882573	CD7/SECTM1	CD7/SECTM1	g.IVS1+2292T>C		A	G	0.4726	0.3158	0.5095	0.5579
rs3760386	Analyzed	17	38095610	CNTNAP1	CNTNAP1	g.IVS11-22G>A		A	G	0.44	0.09746	0.6214	0.5582
rs6752770	Analyzed	2	191681808	STAT1/STAT4	STAT4	g.IVS3-32512T>C		G	A	0.2333	0.6691	0.5173	0.5602
rs198977	Analyzed	19	56073589	KLK2	KLK2	g.Ex5+118C>T	p.R250W	T	C	0.2368	0.6489	0.4232	0.5626
rs3821801	Analyzed	3	188419915	MASP1	MASP1	g.Ex18+829A>G		T	C	0.1486	0.2258	0.5563	0.5631
rs702484	Analyzed	7	6398458	RAC1	RAC1	g.IVS4+261C>G		C	G	0.1867	0.304	0.5914	0.564
rs3136673	Analyzed	3	46217620	CCR1/CCR3	CCR1	g.*2120A>G		T	C	0.1	1	0.4189	0.5645
rs2935542	Analyzed	1	22836058	C1QA/C1QG/C1QB	C1QA	g.-638A>G		G	A	0.1333	1	0.5787	0.5655
rs11042484	Analyzed	11	1274888	TOLLIP	TOLLIP	g.IVS1-1288C>T		A	G	0.1711	0.01927	0.4423	0.5656
rs6503078	Analyzed	17	7937365	ALOXE3	ALOXE3	g.*3304C>A		T	G	0.07237	1	0.3744	0.5657
rs149597	Analyzed	16	11251443	SOCS1	SOCS1	g.*4757G>C		G	C	0.1533	0.1045	0.5464	0.5662
rs4647992	Analyzed	4	103674377	NFKB1	NFKB1	g.IVS4+305C>T		T	C	0.07237	1	0.3744	0.5662
rs4648006	Analyzed	4	103680588	NFKB1	NFKB1	g.IVS5+2447C>T		T	C	0.07333	1	0.3977	0.5662
rs11706450	Analyzed	3	10252866	IRAK2	IRAK2	g.IVS11+1523T>C		C	T	0.2333	0.6691	0.502	0.567
rs5745752	Analyzed	7	81173396	HGF	HGF	g.IVS16+143G>A		T	C	0.3733	0.4683	0.5537	0.5703
rs3093010	Analyzed	6	167468597	CCR6	CCR6	g.IVS1-919C>A		A	C	0.2667	0.2217	0.61	0.5711
rs3794845	Analyzed	18	72843505	MBP	MBP	g.IVS5+7288C>G		C	G	0.07432	1	0.6715	0.5712
rs748694	Analyzed	17	4496938	ALOX15	ALOX15	g.-5242A>G		C	T	0.32	1	0.5602	0.5714
rs3105782	Analyzed	3	188453990	MASP1	MASP1	g.IVS5-193T>C		G	A	0.1622	0.5662	0.5557	0.5717
rs9894356	Analyzed	17	7947037	ALOXE3	ALOXE3	g.IVS14+329C>A		G	T	0.0625	1	0.6559	0.5728
rs746713	Analyzed	22	35589305	NCF4	NCF4	g.IVS1-728T>C		C	T	0.2703	1	0.5697	0.575
rs10071904	Analyzed	5	41255697	C6	C6	g.-16607T>C		A	G	0.2105	0.5805	0.4539	0.5759
rs367523	Analyzed	6	167474766	CCR6	CCR6	g.*3932C>G		G	C	0.4867	1	0.5395	0.576
rs17026	Analyzed	18	72819967	MBP	MBP	g.Ex11-191A>G		C	T	0.3026	0.2651	0.451	0.5762
rs11569450	Analyzed	19	6653455	C3	C3	g.IVS18+27C>G		C	G	0.4333	0.5088	0.5538	0.5765
rs12450996	Analyzed	17	77887398	CD7/SECTM1	CD7/SECTM1	g.-8992T>C		A	G	0.2763	0.4428	0.456	0.5779
rs3138035	Analyzed	17	29670062	CCL2/CCL7/CCL11/CCL8/CCL13/CCL1	CCL2/CCL7/CCL11/CCL8/CCL13/CCL1	g.-571C>T		T	C	0.1133	1	0.4443	0.5779
rs3828511	Analyzed	5	41012092	C7	C7	g.IVS15-517G>T		T	G	0.26	0.6516	0.5858	0.5779
rs1008562	Analyzed	2	218735217	IL8RA/IL8RB	IL8RA	g.*1909G>C		G	C	0.2973	1	0.5592	0.5792
rs8112310	Analyzed	19	7710320	CD209	CD209	g.*3604A>T		A	T	0.3514	0.7213	0.5559	0.5795
rs12264801	Analyzed	10	45234750	ALOX5	ALOX5	g.IVS4-4745G>A		A	G	0.44	0.7417	0.6124	0.5809
rs2070682	Analyzed	7	100563987	SERPINE1	SERPINE1	g.IVS5+93T>C		C	T	0.4267	0.3029	0.5743	0.5813
rs2738116	Analyzed	8	6773827	DEFA4/DEFA6	DEFA6	g.-2859C>T		G	A	0.1554	1	0.5007	0.5831
rs2491393	Analyzed	1	205366882	C4BPA/C4BPB	C4BPA	g.IVS7+19A>G		G	A	0.3133	1	0.543	0.5842
rs10902076	Analyzed	11	1056044	MUC6	MUC6	g.-29331G>C		G	C	0.2267	0.1358	0.5071	0.5858
rs2227692	Analyzed	7	100565964	SERPINE1	SERPINE1	g.IVS7+162C>T		T	C	0.3289	1	0.4732	0.5864
rs17054709	Analyzed	5	156905866	ADAM19	ADAM19	g.IVS3-8289G>A		T	C	0.3288	0.6952	0.5898	0.5883
rs13094773	Analyzed	3	188486877	MASP1	MASP1	g.IVS1-339A>G		C	T	0.3267	1	0.5368	0.5891
rs3212855	Analyzed	19	56019581	KLK1/KLK15	KLK1/KLK15	g.-764A>C		G	T	0.1133	1	0.503	0.5892
rs5743305	Analyzed	4	187226327	TLR3	TLR3	g.-8440T>A		A	T	0.25	0.6518	0.4725	0.5893
rs9308919	Analyzed	2	31422230	XDH	XDH	g.IVS30+909A>G		T	C	0.1149	0.2747	0.513	0.5901
rs4425986	Analyzed	1	205360403	C4BPA/C4BPB	C4BPA	g.IVS4-3487C>T		C	T	0.3267	1	0.5368	0.5911
rs665691	Analyzed	1	22832941	C1QA/C1QG/C1QB	C1QA	g.-3755G>C		C	G	0.36	0.4814	0.5687	0.5919
rs4818740	Analyzed	21	45137569	ITGB2	ITGB2	g.IVS10+178T>A		T	A	0.3733	0.7282	0.5985	0.5925
rs7031036	Analyzed	9	122804015	C5	C5	g.IVS20+4003G>C		C	G	0.2667	0.6911	0.5441	0.5936
rs13340490	Analyzed	7	75277607	CCL24	CCL24	g.*1442T>C		G	A	0.09868	1	0.4233	0.5939
rs1461567	Analyzed	12	42450956	IRAK4	IRAK4	g.IVS2-334G>A		G	A	0.4054	0.7449	0.5533	0.5942
rs3914010	Analyzed	3	188422267	MASP1	MASP1	g.IVS16-651T>C		G	A	0.4211	0.5096	0.4802	0.5946
rs2244529	Analyzed	1	167853656	SELP	SELP	g.IVS2-380T>C		G	A	0.3467	0.5078	0.5456	0.596
rs1990950	Analyzed	5	156853334	ADAM19	ADAM19	g.IVS15-571C>A		G	T	0.4067	0.5084	0.5328	0.5976
rs4704871	Analyzed	5	156852384	ADAM19	ADAM19	g.IVS16+175G>A		C	T	0.4067	0.5084	0.5328	0.5976
rs5519	Analyzed	19	56014124	KLK1/KLK15	KLK1/KLK15	g.*137A>G		T	C	0.4324	0.5001	0.5262	0.5976
rs4513579	Analyzed	4	38450211	TLR1/TLR10/TLR6	TLR10	g.*959G>A		T	C	0.4667	0.5105	0.6024	0.5977
rs6427597	Analyzed	1	159750904	FCGR2A	FCGR2A	g.IVS6+558T>G		G	T	0.322	0.03209	0.5734	0.5978
rs2885735	Analyzed	7	915641	CENTA1	CENTA1	g.IVS4-4306T>C		A	G	0.0678	1	0.5441	0.5992
rs1168758	Analyzed	12	64880401	IRAK3	IRAK3	g.IVS1-3357C>G		G	C	0.4054	0.4845	0.6492	0.5995
rs2230205	Analyzed	19	6660704	C3	C3	g.Ex14-10G>A	p.T612T	T	C	0.473	0.7411	0.536	0.6013
rs3759333	Analyzed	12	6362208	LTBR	LTBR	g.-1577C>T		T	C	0.4533	0.5084	0.6423	0.6023
rs470934	Analyzed	18	72826946	MBP	MBP	g.IVS8-792C>A		T	G	0.4658	0.3079	0.6123	0.6027
rs16861729	Analyzed	3	188418020	MASP1	MASP1	g.*2532A>G		T	C	0.4267	0.04762	0.6476	0.6045
rs2863747	Analyzed	5	156863362	ADAM19	ADAM19	g.IVS11-796G>C		G	C	0.1554	0.2861	0.521	0.6056
rs1774916	Analyzed	1	57212421	C8A/C8B	C8B	g.-8211A>G		T	C	0.4933	1	0.6202	0.6058
rs365654	Analyzed	17	29701822	CCL2/CCL7/CCL11/CCL8/CCL13/CCL1	CCL2/CCL7/CCL11/CCL8/CCL13/CCL1	g.*9868T>C		A	G	0.1959	1	0.5189	0.6066
rs2569190	Analyzed	5	139993100	CD14	CD14	g.-259T>C		G	A	0.4459	0.01738	0.5108	0.6079
rs6860540	Analyzed	5	156870905	ADAM19	ADAM19	g.IVS8-1852C>T		G	A	0.3	0.1343	0.5592	0.6092
rs7574920	Analyzed	2	31439153	XDH	XDH	g.IVS24+1375C>G		C	G	0.3133	1	0.5312	0.6097
rs11068446	Analyzed	12	116231997	NOS1	NOS1	g.IVS3+1657G>A		T	C	0.3267	0.4729	0.6514	0.6128
rs971075	Analyzed	5	41016342	C7	C7	g.IVS17+574A>G		A	G	0.3133	0.4496	0.6386	0.6149
rs6740131	Analyzed	2	191597827	STAT1/STAT4	STAT4	g.*4983T>C		G	A	0.3649	0.7139	0.6562	0.6158
rs155266	Analyzed	3	10205728	IRAK2	IRAK2	g.IVS2+11024T>A		T	A	0.28	0.0002245	0.5792	0.6162
rs10824800	Analyzed	10	54208316	MBL2	MBL2	g.-6914T>G		A	C	0.4459	0.4943	0.6911	0.6197
rs7040033	Analyzed	9	122798865	C5	C5	g.IVS21-466C>T		G	A	0.4211	0.5024	0.5056	0.6198
rs2291427	Analyzed	10	45256230	ALOX5	ALOX5	g.IVS8+143A>G		A	G	0.3333	0.4683	0.6184	0.6212
rs4254165	Analyzed	13	30215878	ALOX5AP	ALOX5AP	g.IVS1-319A>G		A	G	0.48	0.5088	0.6424	0.6217
rs4368711	Analyzed	5	156877249	ADAM19	ADAM19	g.IVS7+1160G>A		T	C	0.1944	1	0.6106	0.6223
rs760458	Analyzed	21	45153345	ITGB2	ITGB2	g.IVS3+1282G>T		A	C	0.2533	1	0.6401	0.6234
rs3780901	Analyzed	10	45237382	ALOX5	ALOX5	g.IVS4-2113C>T		C	T	0.1733	1	0.5902	0.6247
rs4608848	Analyzed	4	187247098	TLR3	TLR3	g.*4076C>T		C	T	0.4	0.1745	0.6311	0.6252
rs2382987	Analyzed	19	17795018	JAK3	JAK3	g.-1702T>C		G	A	0.1333	0.5733	0.5787	0.6255
rs3744711	Analyzed	17	5287323	C1QBP	DHX33	g.Ex12-1025T>C		G	A	0.1689	1	0.5893	0.6258
rs1248623	Analyzed	10	79243519	DLG5	DLG5	g.IVS19-1378A>G		T	C	0.3421	1	0.5075	0.6262
rs11172106	Analyzed	12	55799142	STAT6	STAT6	g.-10813G>C		G	C	0.3026	0.1603	0.5059	0.6277
rs1984309	Analyzed	22	22560815	MIF	MIF	g.*3778A>G		G	A	0.4189	0.7333	0.6813	0.6282
rs883182	Analyzed	8	6869803	DEFA3	DEFA3	g.-8020C>G		G	C	0.36	0.7119	0.6	0.6289
rs2236868	Analyzed	1	167850620	SELP	SELP	g.IVS3-1065C>T		A	G	0.2067	0.584	0.6132	0.6292
rs3024896	Analyzed	2	191604961	STAT1/STAT4	STAT4	g.IVS21-474G>A		T	C	0.3158	0.286	0.5147	0.6292
rs3917681	Analyzed	1	167858327	SELP	SELP	g.IVS1-3246T>C		G	A	0.2067	0.584	0.6132	0.6292
rs6131	Analyzed	1	167847509	SELP	SELP	g.Ex7+31G>A	p.S331N	T	C	0.2067	0.584	0.6132	0.6292
rs2248814	Analyzed	17	23124448	NOS2A	NOS2A	g.IVS12-52T>C		A	G	0.26	0.6516	0.6028	0.63
rs12578547	Analyzed	12	116247730	NOS1	NOS1	g.IVS2+4803A>G		C	T	0.3333	0.4683	0.6184	0.6304
rs224205	Analyzed	16	3236617	MEFV	MEFV	g.IVS5-69G>A		C	T	0.4342	0.5089	0.5201	0.6322
rs4629524	Analyzed	4	71371636	MUC7	MUC7	g.-2691A>G		G	A	0.1467	0.5611	0.584	0.6334
rs1248650	Analyzed	10	79305100	DLG5	DLG5	g.-6164T>C		A	G	0.3133	1	0.5641	0.6335
rs2753345	Analyzed	1	86707881	CLCA1/CLCA2	CLCA1	g.IVS2+477G>A		A	G	0.07333	0.1968	0.734	0.6335
rs4656701	Analyzed	1	167954527	SELE	SELE	g.*6981G>C		C	G	0.4079	1	0.5241	0.6338
rs167428	Analyzed	4	123992889	FGF2	FGF2	g.IVS1-24037T>C		C	T	0.07333	1	0.7082	0.634
rs12544296	Analyzed	8	75059402	LY96	LY96	g.-6829A>G		A	G	0.3311	0.4398	0.5745	0.6352
rs5750326	Analyzed	22	35606231	NCF4	NCF4	g.*2419A>C		C	A	0.4605	0.5266	0.5246	0.6355
rs1642736	Analyzed	3	10240057	IRAK2	IRAK2	g.IVS9+542T>C		T	C	0.1118	0.2611	0.4694	0.6371
rs3733492	Analyzed	4	71382283	MUC7	MUC7	g.Ex3-1021T>C		C	T	0.1533	0.2739	0.5464	0.6383
rs7918542	Analyzed	10	45216257	ALOX5	ALOX5	g.IVS3+4867A>G		G	A	0.2133	1	0.6363	0.6388
rs2279078	Analyzed	18	72825169	MBP	MBP	g.IVS10+550A>G		C	T	0.24	0.3933	0.6314	0.641
rs3823773	Analyzed	7	30466486	CARD4	CARD4	g.IVS1-304A>G		C	T	0.1645	0.5697	0.4887	0.6439
rs10279968	Analyzed	7	917094	CENTA1	CENTA1	g.IVS4-5759G>C		G	C	0.3056	1	0.6183	0.6443
rs1732893	Analyzed	12	64859723	IRAK3	IRAK3	g.-9623C>A		C	A	0.42	0.7321	0.7029	0.6448
rs1883113	Analyzed	22	35582630	NCF4	NCF4	g.-4529C>G		C	G	0.125	0.3361	0.4825	0.6449
rs875643	Analyzed	22	22563998	MIF	MIF	g.-2663G>A		A	G	0.3151	1	0.6253	0.6462
rs3822356	Analyzed	5	140002620	CD14	PRO1580	g.IVS6-56A>G		G	A	0.3378	1	0.6406	0.6466
rs6718606	Analyzed	2	31457111	XDH	XDH	g.IVS12-765G>C		G	C	0.1467	0.5611	0.584	0.647
rs16842010	Analyzed	1	157546618	FCER1A	FCER1A	g.*2271C>T		C	T	0.4474	0.3422	0.533	0.6482
rs3843293	Analyzed	1	181806072	NCF2	NCF2	g.IVS6+466C>A		G	T	0.3667	0.4904	0.7002	0.6482
rs8073066	Analyzed	17	31407405	CCL18	CCL18	g.-8410C>T		T	C	0.5	0.02526	0.5371	0.6493
rs2271316	Analyzed	17	6856125	ALOX12	ALOX12	g.*1658C>G		C	G	0.4322	0.7092	0.6744	0.6503
rs1076637	Analyzed	1	167964068	SELE	SELE	g.IVS7-57G>A		T	C	0.4868	1	0.5368	0.6509
rs930507	Analyzed	10	54198272	MBL2	MBL2	g.Ex4+5C>G	p.L126L	G	C	0.14	0.4237	0.5339	0.6529
rs6451566	Analyzed	5	41202450	C6	C6	g.IVS9-4732A>G		T	C	0.3649	0.7139	0.6744	0.6539
rs4811656	Analyzed	20	36360658	BPI/LBP	BPI/LBP	g.-5369C>G		G	C	0.4342	1	0.5404	0.6543
rs805286	Analyzed	6	31787286	LY6G6D	LY6G6D	g.-3825G>A		G	A	0.3425	1	0.6337	0.6567
rs1031509	Analyzed	2	191718434	STAT1/STAT4	STAT4	g.IVS3+1150A>C		T	G	0.2733	0.3933	0.6342	0.657
rs6860438	Analyzed	5	41015419	C7	C7	g.IVS16-165G>T		T	G	0.3684	0.7226	0.5406	0.6573
rs1046673	Analyzed	19	4767241	TICAM1	TICAM1	g.Ex1-250C>T		A	G	0.08667	1	0.7204	0.658
rs4657055	Analyzed	1	159760516	FCGR2A	HSPA6	g.-556C>T		T	C	0.2703	0.1716	0.6078	0.659
rs8082480	Analyzed	17	29666973	CCL2/CCL7/CCL11/CCL8/CCL13/CCL1	CCL2/CCL7/CCL11/CCL8/CCL13/CCL1	g.-3660A>C		A	C	0.25	1	0.6861	0.6593
rs1444903	Analyzed	5	41240060	C6	C6	g.IVS1-951G>A		T	C	0.2067	0.584	0.6261	0.6595
rs17004044	Analyzed	22	22569895	MIF	MIF	g.*2601C>T		C	T	0.1164	1	0.6611	0.6596
rs7841223	Analyzed	8	6868805	DEFA3	DEFA3	g.-7022T>C		A	G	0.08667	1	0.7204	0.66
rs13036802	Analyzed	20	80775	DEFB126	DEFB126	g.*6441C>T		C	T	0.1667	0.5733	0.5574	0.6629
rs2051344	Analyzed	18	72844641	MBP	MBP	g.IVS5+6152C>A		T	G	0.1667	0.5733	0.5574	0.6645
rs12063780	Analyzed	1	205341917	C4BPA/C4BPB	C4BPB	g.*2019C>G		G	C	0.2	0.3194	0.6612	0.6646
rs2808467	Analyzed	1	205340424	C4BPA/C4BPB	C4BPB	g.*526G>T		T	G	0.2	0.3194	0.6612	0.6646
rs2236876	Analyzed	1	171284109	TNFSF18	TNFSF18	g.IVS1+2395C>T		G	A	0.25	0.3899	0.6732	0.665
rs2250656	Analyzed	19	6669534	C3	C3	g.IVS2-111A>G		C	T	0.2303	0.3979	0.5115	0.6673
rs11465853	Analyzed	3	10181981	IRAK2	IRAK2	g.IVS1+249G>C		C	G	0.4667	0.3206	0.6463	0.6704
rs698094	Analyzed	3	188453502	MASP1	MASP1	g.IVS6+148T>C		A	G	0.3446	0.4558	0.6061	0.6708
rs1991262	Analyzed	8	75081883	LY96	LY96	g.IVS2+2209G>C		C	G	0.1014	1	0.6843	0.6721
rs2072496	Analyzed	19	17807054	JAK3	JAK3	g.IVS14-30C>T		A	G	0.2039	0.6518	0.5258	0.6725
rs3024851	Analyzed	2	191637067	STAT1/STAT4	STAT4	g.IVS8+711T>A		T	A	0.18	1	0.5842	0.6728
rs11661054	Analyzed	18	72833263	MBP	MBP	g.IVS5-2259G>T		A	C	0.2039	0.1582	0.5258	0.6734
rs2292350	Analyzed	17	6842396	ALOX12	ALOX12	g.IVS2-156G>A		A	G	0.38	1	0.7221	0.6737
rs3756561	Analyzed	5	66528836	CD180	CD180	g.-610G>A		T	C	0.16	1	0.6233	0.674
rs2297516	Analyzed	17	23119857	NOS2A	NOS2A	g.IVS17+273T>G		A	C	0.3919	0.1695	0.7023	0.6745
rs4720672	Analyzed	7	6410364	RAC1	RAC1	g.*1761C>T		C	T	0.1908	1	0.5218	0.6758
rs1582091	Analyzed	1	100949721	VCAM1	VCAM1	g.-8283T>G		T	G	0.42	0.5121	0.7191	0.6765
rs708486	Analyzed	14	51810721	PTGDR	PTGDR	g.IVS1-478A>G		G	A	0.1513	0.09939	0.5228	0.6765
rs6069672	Analyzed	20	36367736	BPI/LBP	BPI/LBP	g.IVS1+1567T>C		C	T	0.2171	0.6096	0.5287	0.6772
rs3816997	Analyzed	12	92494917	SOCS2	SOCS2	g.*1830C>A		C	A	0.2039	0.3142	0.5258	0.6774
rs3212846	Analyzed	19	56013069	KLK1/KLK15	KLK1/KLK15	g.*1192A>G		C	T	0.4533	0.5185	0.6199	0.6781
rs1187873	Analyzed	14	54570004	SOCS4	SOCS4	g.IVS2+1545T>C		C	T	0.2171	0.08582	0.5287	0.6782
rs2026882	Analyzed	21	45147281	ITGB2	ITGB2	g.IVS5+427G>A		T	C	0.06757	1	0.5563	0.6782
rs494852	Analyzed	2	31478340	XDH	XDH	g.IVS3-642G>A		T	C	0.1267	0.5035	0.7554	0.6805
rs2416810	Analyzed	9	122825021	C5	C5	g.IVS10+482C>T		A	G	0.1776	0.2056	0.5352	0.6815
rs2023906	Analyzed	17	35967212	CCR7	CCR7	g.IVS2+1459C>T		G	A	0.05479	1	0.5309	0.6818
rs9200	Analyzed	5	41178363	C6	C6	g.Ex18-271G>A		C	T	0.2703	0.02024	0.6185	0.6829
rs2740502	Analyzed	19	56017998	KLK1/KLK15	KLK1/KLK15	g.IVS1+773C>G		C	G	0.18	0.5611	0.5842	0.6834
rs631090	Analyzed	1	22858990	C1QA/C1QG/C1QB	C1QB	g.IVS1+267T>C		C	T	0.2697	0.4595	0.5306	0.6844
rs3774934	Analyzed	4	103646506	NFKB1	NFKB1	g.IVS1+4529A>G		A	G	0.38	0.7248	0.6809	0.6848
rs8096433	Analyzed	18	72861961	MBP	MBP	g.IVS3-3749T>A		A	T	0.2867	1	0.6595	0.6854
rs12937410	Analyzed	17	7917830	ALOX12B/ALOX15B	ALOX12B	g.IVS12-30T>C		A	G	0.223	0.1458	0.7016	0.6862
rs344550	Analyzed	19	6633953	C3	C3	g.IVS33-713G>C		C	G	0.4467	1	0.7296	0.6878
rs1266071	Analyzed	6	31777475	LY6G6D	BAT5	g.IVS2+355G>A		T	C	0.06757	1	0.5563	0.6882
rs7528588	Analyzed	1	159456558	FCER1G	FCER1G	g.*1200C>G		G	C	0.2933	0.01634	0.6582	0.6884
rs10503360	Analyzed	8	6895465	DEFA5	DEFA5	g.*4897A>C		T	G	0.3851	0.7333	0.6254	0.6905
rs2282691	Analyzed	17	29712422	CCL2/CCL7/CCL11/CCL8/CCL13/CCL1	CCL2/CCL7/CCL11/CCL8/CCL13/CCL1	g.IVS2+495A>T		T	A	0.48	1	0.635	0.691
rs2285747	Analyzed	17	5277861	C1QBP	C1QBP	g.IVS3-50C>G		G	C	0.2171	0.6096	0.5459	0.6911
rs913836	Analyzed	9	34654672	IL11RA	IL11RA	g.*3176C>T		C	T	0.2039	0.6518	0.5433	0.6916
rs3024974	Analyzed	12	55779012	STAT6	STAT6	g.IVS17+53C>T		A	G	0.1733	0.2154	0.7181	0.6928
rs4957473	Analyzed	5	39378920	C9	C9	g.IVS1-865T>C		G	A	0.2467	0.6691	0.764	0.6928
rs6069668	Analyzed	20	36367044	BPI/LBP	BPI/LBP	g.IVS1+875C>G		G	C	0.2	0.3194	0.6378	0.6931
rs10003641	Analyzed	4	71375016	MUC7	MUC7	g.IVS2+635T>C		C	T	0.4257	0.5194	0.6397	0.6934
rs4890785	Analyzed	18	72833961	MBP	MBP	g.IVS5-2957A>G		T	C	0.1824	0.2258	0.6369	0.6947
rs13022931	Analyzed	2	191728974	STAT1/STAT4	STAT4	g.-7799T>C		G	A	0.1267	1	0.7393	0.6961
rs1031507	Analyzed	2	191728863	STAT1/STAT4	STAT4	g.-7688G>T		A	C	0.4333	0.1745	0.6903	0.6965
rs16833437	Analyzed	2	191727617	STAT1/STAT4	STAT4	g.-6442C>A		T	G	0.4333	0.1745	0.6903	0.6965
rs3918350	Analyzed	8	6774191	DEFA4/DEFA6	DEFA6	g.-3223G>A		T	C	0.4933	0.5098	0.6487	0.6985
rs7274607	Analyzed	20	36356967	BPI/LBP	BPI/LBP	g.-9060C>T		T	C	0.1333	1	0.6508	0.6985
rs3917709	Analyzed	1	167851169	SELP	SELP	g.IVS3-1614C>T		A	G	0.2039	0.5805	0.559	0.6995
rs17038412	Analyzed	2	31438719	XDH	XDH	g.IVS24+1809A>T		A	T	0.4067	1	0.7051	0.6997
rs7789045	Analyzed	7	30460547	CARD4	CARD4	g.IVS5+731A>T		T	A	0.32	1	0.6256	0.7002
rs3774284	Analyzed	3	188472563	MASP1	MASP1	g.IVS2-9361A>T		A	T	0.1645	0.1471	0.5621	0.7007
rs470821	Analyzed	18	72822206	MBP	MBP	g.IVS10-791A>G		T	C	0.3067	0.2637	0.632	0.7011
rs8081248	Analyzed	17	23106091	NOS2A	NOS2A	g.*2307C>T		A	G	0.24	0.649	0.7384	0.7011
rs2791519	Analyzed	1	86706764	CLCA1/CLCA2	CLCA1	g.IVS1+35T>G		T	G	0.44	0.5088	0.64	0.7037
rs11096955	Analyzed	4	38452502	TLR1/TLR10/TLR6	TLR10	g.Ex4+1167A>C	p.I369L	T	G	0.42	0.7321	0.7191	0.704
rs5743533	Analyzed	20	36392732	BPI/LBP	BPI/LBP	g.IVS11-132G>A		A	G	0.1333	0.4237	0.6711	0.7043
rs6984215	Analyzed	8	6872288	DEFA3	DEFA3	g.-10505G>A		C	T	0.3867	0.7321	0.6074	0.7044
rs11953839	Analyzed	5	39365195	C9	C9	g.IVS5+2340C>T		A	G	0.4671	0.1857	0.5613	0.7055
rs3093003	Analyzed	6	167473464	CCR6	CCR6	g.*2630A>G		A	G	0.05333	1	0.4788	0.7066
rs4792203	Analyzed	17	7933920	ALOX12B/ALOX15B	ALOX12B	g.-2434G>A		T	C	0.1333	1	0.6508	0.7069
rs2289588	Analyzed	17	7948408	ALOXE3	ALOXE3	g.IVS12-150G>A		C	T	0.3467	1	0.6337	0.7075
rs442319	Analyzed	17	29699585	CCL2/CCL7/CCL11/CCL8/CCL13/CCL1	CCL2/CCL7/CCL11/CCL8/CCL13/CCL1	g.-8073A>G		G	A	0.3533	1	0.683	0.7077
rs2509973	Analyzed	11	61935947	SCGB1A1	SCGB1A1	g.-7196C>A		A	C	0.3836	0.4835	0.6493	0.7085
rs9668031	Analyzed	12	107538444	SELPLG	SELPLG	g.*2529G>A		T	C	0.3133	0.4496	0.6726	0.7086
rs5743794	Analyzed	4	38509122	TLR1/TLR10/TLR6	TLR6	g.-1632A>G		T	C	0.4133	0.7391	0.641	0.7092
rs10512766	Analyzed	5	41249092	C6	C6	g.IVS1+143G>C		G	C	0.05263	1	0.4547	0.7096
rs17260228	Analyzed	5	41204861	C6	C6	g.IVS9+3223G>A		T	C	0.05263	1	0.4547	0.7096
rs2734700	Analyzed	1	86722908	CLCA1/CLCA2	CLCA1	g.IVS6-706G>A		G	A	0.2667	0.1116	0.6361	0.7096
rs308441	Analyzed	4	123993515	FGF2	FGF2	g.IVS1-23411C>T		T	C	0.05333	1	0.4788	0.7096
rs17020993	Analyzed	1	205355015	C4BPA/C4BPB	C4BPA	g.IVS3-369A>G		G	A	0.1908	0.3161	0.5835	0.71
rs2749812	Analyzed	20	23010927	C1QR1	C1QR1	g.Ex2+1685T>C		A	G	0.05263	1	0.4547	0.7105
rs3093032	Analyzed	19	10257336	ICAM1/ICAM4/ICAM5	ICAM1/ICAM4/ICAM5	g.Ex7+546C>T		T	C	0.05263	1	0.4547	0.7105
rs16910280	Analyzed	9	122844597	C5	C5	g.IVS3+506G>A		T	C	0.2566	1	0.5774	0.7119
rs9892383	Analyzed	17	7950953	ALOXE3	ALOXE3	g.IVS12+1558A>G		C	T	0.07333	1	0.734	0.7119
rs3789138	Analyzed	4	124004171	FGF2	FGF2	g.IVS1-12755A>G		A	G	0.4467	0.7391	0.6964	0.712
rs12628766	Analyzed	22	22563914	MIF	MIF	g.-2747G>T		G	T	0.1216	1	0.6128	0.7121
rs609061	Analyzed	6	32018141	C2	C2	g.IVS9-574G>A		A	G	0.07333	1	0.734	0.7129
rs6949758	Analyzed	7	30468204	CARD4	CARD4	g.IVS1-2022C>G		C	G	0.3867	0.5121	0.63	0.714
rs11260013	Analyzed	19	7665676	FCER2	FCER2	g.IVS8+2035G>A		T	C	0.4384	0.5001	0.6402	0.7165
rs2278442	Analyzed	19	10305826	ICAM3	ICAM3	g.IVS6+10C>T		G	A	0.4247	0.07832	0.7636	0.7169
rs2228315	Analyzed	12	107542027	SELPLG	SELPLG	g.Ex2+191G>A	p.M62I	T	C	0.2533	0.3983	0.6512	0.7178
rs1429376	Analyzed	2	31442065	XDH	XDH	g.IVS22-151T>G		A	C	0.14	0.5733	0.742	0.7184
rs6427213	Analyzed	1	167979770	SELE	SELE	g.-10392T>C		G	A	0.1351	1	0.6235	0.7185
rs537160	Analyzed	6	32024379	C2	BF	g.IVS7+111A>G		A	G	0.3092	1	0.5835	0.7186
rs3181088	Analyzed	1	100971296	VCAM1	VCAM1	g.IVS7+468C>T		T	C	0.1149	0.4337	0.724	0.7188
rs7135975	Analyzed	12	7134709	C1RL	C1RL	g.*5419T>C		G	A	0.1622	1	0.6394	0.72
rs9729550	Analyzed	1	1125105	TNFRSF18	TNFRSF18	g.*3728T>G		A	C	0.2881	0.6714	0.726	0.7211
rs3917739	Analyzed	1	167846002	SELP	SELP	g.IVS7-451G>A		C	T	0.2667	0.688	0.6361	0.7212
rs12051609	Analyzed	17	7935419	ALOX12B/ALOX15B	ALOX12B	g.-3933T>C		G	A	0.4539	1	0.5979	0.7267
rs1732877	Analyzed	12	64885411	IRAK3	IRAK3	g.IVS2+1471T>C		T	C	0.46	0.1865	0.711	0.7272
rs1898830	Analyzed	4	154827903	TLR2	TLR2	g.IVS1-616A>G		G	A	0.4867	0.7417	0.7421	0.7274
rs4147063	Analyzed	13	30217954	ALOX5AP	ALOX5AP	g.IVS2+1658T>C		T	C	0.2635	0.4028	0.6938	0.7297
rs16870514	Analyzed	5	40950922	C7	C7	g.IVS1+5447G>A		A	G	0.3851	1	0.6679	0.7316
rs261753	Analyzed	5	39361099	C9	C9	g.IVS5+6436A>G		T	C	0.4013	0.7469	0.6071	0.7319
rs12142755	Analyzed	1	159748367	FCGR2A	FCGR2A	g.IVS5+997A>G		G	A	0.06667	1	0.526	0.7327
rs17004047	Analyzed	22	22570919	MIF	MIF	g.*3625A>G		G	A	0.06667	1	0.526	0.7329
rs2842754	Analyzed	1	205323926	C4BPA/C4BPB	C4BPB	g.-5573T>C		C	T	0.06	1	0.6906	0.7338
rs3917412	Analyzed	1	167967126	SELE	SELE	g.IVS4+474A>G		T	C	0.2829	0.2571	0.6104	0.7341
rs760456	Analyzed	21	45153843	ITGB2	ITGB2	g.IVS3+784C>G		C	G	0.4934	0.0213	0.612	0.7354
rs10116271	Analyzed	9	122817969	C5	C5	g.IVS15+384G>A		C	T	0.3	0.2679	0.7773	0.7362
rs6024876	Analyzed	20	36387124	BPI/LBP	BPI/LBP	g.IVS9+475A>G		G	A	0.34	1	0.7002	0.7363
rs2808630	Analyzed	1	157947492	CRP	CRP	g.*2446A>G		C	T	0.1081	1	0.6579	0.7364
rs3917010	Analyzed	1	100963454	VCAM1	VCAM1	g.IVS4+420A>C		C	A	0.2133	0.616	0.7592	0.7374
rs3792298	Analyzed	3	169024676	SERPINI1	SERPINI1	g.IVS7-279C>A		A	C	0.06	1	0.6906	0.7377
rs3024912	Analyzed	2	191601332	STAT1/STAT4	STAT4	g.*1478T>G		C	A	0.3986	0.3015	0.7018	0.738
rs4251513	Analyzed	12	42460471	IRAK4	IRAK4	g.IVS8-1906G>C		G	C	0.2697	0.6646	0.6213	0.7383
rs1558001	Analyzed	7	81245016	HGF	HGF	g.-7792G>A		T	C	0.4013	1	0.6071	0.7386
rs7732104	Analyzed	5	41019193	C7	C7	g.*1760A>G		A	G	0.06	1	0.6906	0.7395
rs1041740	Analyzed	21	31962033	SOD1	SOD1	g.IVS4+474C>T		T	C	0.4013	1	0.6173	0.7416
rs13389224	Analyzed	2	228377279	CCL20	CCL20	g.-9592C>T		C	T	0.4539	1	0.6188	0.7463
rs3136685	Analyzed	17	35973325	CCR7	CCR7	g.IVS1+1853G>A		T	C	0.2945	0.01443	0.7439	0.7468
rs698104	Analyzed	3	188485211	MASP1	MASP1	g.IVS2+1096T>C		A	G	0.1554	0.2258	0.7398	0.7497
rs6572	Analyzed	22	35951391	RAC2	RAC2	g.Ex7-136G>C		C	G	0.4408	0.5044	0.6432	0.7501
rs2213430	Analyzed	22	35968906	RAC2	RAC2	g.IVS1+1194A>G		T	C	0.4276	0.1143	0.6489	0.7518
rs281413	Analyzed	19	10307734	ICAM3	ICAM3	g.IVS2-82C>T		A	G	0.07895	1	0.5292	0.7522
rs816293	Analyzed	12	116247082	NOS1	NOS1	g.IVS2+5451G>C		G	C	0.2297	0.6516	0.6725	0.7523
rs3775291	Analyzed	4	187241068	TLR3	TLR3	g.Ex4+601C>T	p.L412F	T	C	0.26	1	0.7767	0.7527
rs9644778	Analyzed	8	6897064	DEFA5	DEFA5	g.*3298T>G		C	A	0.2297	0.6516	0.6725	0.7538
rs6048546	Analyzed	20	23022201	C1QR1	C1QR1	g.-7371T>C		A	G	0.07895	1	0.5292	0.754
rs2277984	Analyzed	19	6630511	C3	C3	g.IVS36-4G>A		T	C	0.4795	0.7403	0.8531	0.7544
rs2675982	Analyzed	5	40996035	C7	C7	g.IVS12+556C>T		T	C	0.1	0.3442	0.7484	0.7551
rs3782415	Analyzed	12	92491886	SOCS2	SOCS2	g.IVS2-743T>C		T	C	0.4934	0.752	0.6309	0.7557
rs6127742	Analyzed	20	36383964	BPI/LBP	BPI/LBP	g.IVS7-1722G>A		A	G	0.2667	0.6691	0.7764	0.7559
rs2066804	Analyzed	2	191550004	STAT1/STAT4	STAT1	g.IVS21-8C>T		A	G	0.3882	0.5089	0.6481	0.7589
rs4073260	Analyzed	13	30204449	ALOX5AP	ALOX5AP	g.-3293A>G		G	A	0.1849	0.5882	0.7752	0.7601
rs16967637	Analyzed	17	37699948	STAT3/STAT5A	STAT3/STAT5A	g.IVS5-1215C>A		A	C	0.1824	1	0.7191	0.7612
rs533116	Analyzed	11	60384159	GPR44	GPR44	g.-6387G>A		T	C	0.06757	1	0.5959	0.7618
rs10223101	Analyzed	5	66537576	CD180	CD180	g.-9350G>A		T	C	0.2162	1	0.8004	0.762
rs1697142	Analyzed	5	66531603	CD180	CD180	g.-3377A>G		C	T	0.3986	0.4845	0.7903	0.7623
rs1705392	Analyzed	5	66536024	CD180	CD180	g.-7798G>C		G	C	0.3986	0.4845	0.7903	0.7623
rs2734705	Analyzed	1	86724912	CLCA1/CLCA2	CLCA1	g.Ex8-113A>G	p.N357S	A	G	0.06579	0.1918	0.5406	0.7623
rs4694068	Analyzed	4	71376566	MUC7	MUC7	g.IVS2+2185A>G		G	A	0.2533	0.08148	0.764	0.7626
rs4941210	Analyzed	18	59473023	SERPINB3	SERPINB3	g.*847G>A		C	T	0.4122	0.01459	0.7857	0.7642
rs4795095	Analyzed	17	31221413	CCL5	CCL5	g.*2080T>C		G	A	0.2297	0.1594	0.8008	0.7664
rs12327969	Analyzed	2	191719016	STAT1/STAT4	STAT4	g.IVS3+568C>G		C	G	0.277	0.3899	0.712	0.7665
rs11888	Analyzed	19	17796626	JAK3	JAK3	g.*1925G>A		T	C	0.4803	0.3415	0.6543	0.7674
rs1442849	Analyzed	17	7964846	HES7	HES7	g.*767G>A		T	C	0.4797	0.3136	0.8405	0.768
rs2506	Analyzed	10	54195515	MBL2	MBL2	g.Ex4-370T>G		C	A	0.2297	1	0.8192	0.7685
rs11569521	Analyzed	19	6640487	C3	C3	g.IVS27+1153C>G		C	G	0.06667	1	0.5676	0.7708
rs3091322	Analyzed	17	29623973	CCL2/CCL7/CCL11/CCL8/CCL13/CCL1	CCL2/CCL7/CCL11/CCL8/CCL13/CCL1	g.*1038A>G		A	G	0.3581	1	0.7784	0.7715
rs3091328	Analyzed	17	29627834	CCL2/CCL7/CCL11/CCL8/CCL13/CCL1	CCL2/CCL7/CCL11/CCL8/CCL13/CCL1	g.-9106A>G		A	G	0.3581	1	0.7784	0.7715
rs6967221	Analyzed	7	6397616	RAC1	RAC1	g.IVS3-464G>A		A	G	0.09211	1	0.554	0.7715
rs6896064	Analyzed	5	156907594	ADAM19	ADAM19	g.IVS3-10017A>C		G	T	0.1351	1	0.72	0.7716
rs11466782	Analyzed	5	156854533	ADAM19	ADAM19	g.IVS14-152T>C		G	A	0.2067	1	0.7641	0.7717
rs850312	Analyzed	3	188436502	MASP1	MASP1	g.Ex12+548G>A		T	C	0.2067	0.6578	0.7824	0.7732
rs2974260	Analyzed	18	72841432	MBP	MBP	g.IVS5+9361C>A		T	G	0.2533	0.4078	0.7877	0.7738
rs11569523	Analyzed	19	6640042	C3	C3	g.IVS27+1598G>A		T	C	0.2067	0.6578	0.7824	0.7753
rs3745568	Analyzed	19	6641613	C3	C3	g.IVS27+27A>C		G	T	0.08	1	0.5965	0.7757
rs4841815	Analyzed	8	6865288	DEFA3	DEFA3	g.-3505G>A		C	T	0.2708	0.6559	0.7257	0.7764
rs751271	Analyzed	16	49308676	CARD15	CARD15	g.IVS6+290T>G		G	T	0.2867	0.2325	0.7883	0.7785
rs1962149	Analyzed	1	206023182	MCP	MCP	g.IVS9-78G>A		A	G	0.07895	1	0.5654	0.7787
rs7541230	Analyzed	1	206024178	MCP	MCP	g.IVS10-861T>C		C	T	0.07895	1	0.5654	0.7787
rs7099684	Analyzed	10	45217161	ALOX5	ALOX5	g.IVS3+5771A>T		A	T	0.1184	1	0.5895	0.7789
rs1429372	Analyzed	2	31479889	XDH	XDH	g.IVS2-375T>C		G	A	0.2933	0.1116	0.8191	0.7791
rs4142863	Analyzed	1	205322277	C4BPA/C4BPB	C4BPB	g.-7222C>T		C	T	0.1733	0.5611	0.7181	0.7792
rs4795896	Analyzed	17	29636365	CCL2/CCL7/CCL11/CCL8/CCL13/CCL1	CCL2/CCL7/CCL11/CCL8/CCL13/CCL1	g.-575C>T		T	C	0.3667	1	0.7617	0.7798
rs760462	Analyzed	21	45152527	ITGB2	ITGB2	g.IVS3-1089A>G		T	C	0.26	0.03698	0.7384	0.7802
rs7838017	Analyzed	8	75098253	LY96	LY96	g.IVS3-3325C>T		T	C	0.1067	1	0.6145	0.7813
rs2289277	Analyzed	5	110436966	TSLP	TSLP	g.Ex3+42C>G		G	C	0.2867	1	0.7883	0.782
rs17312836	Analyzed	16	49298963	CARD15	CARD15	g.IVS2-304A>C		C	A	0.2533	1	0.7806	0.7841
rs3176860	Analyzed	1	100959807	VCAM1	VCAM1	g.IVS2+912A>G		G	A	0.3733	0.4835	0.8349	0.786
rs3845466	Analyzed	1	181818383	NCF2	NCF2	g.IVS2+4270C>T		A	G	0.1733	0.5611	0.7043	0.7867
rs4804221	Analyzed	19	7675188	FCER2	FCER2	g.-4541G>A		T	C	0.12	1	0.6342	0.7874
rs6673422	Analyzed	1	205320110	PFKFB2	PFKFB2	g.Ex16-882A>G		G	A	0.08108	1	0.6548	0.7876
rs11742401	Analyzed	5	156885918	ADAM19	ADAM19	g.IVS5+4475G>A		T	C	0.1486	0.5146	0.7499	0.7886
rs11603020	Analyzed	11	57130908	SERPING1	SERPING1	g.IVS6+312T>C		C	T	0.12	1	0.6342	0.7895
rs7037673	Analyzed	9	122780305	C5	C5	g.IVS28-1301G>A		C	T	0.46	1	0.7401	0.7909
rs3765989	Analyzed	1	86716951	CLCA1/CLCA2	CLCA1	g.IVS5+2127A>T		T	A	0.14	0.01725	0.7901	0.7926
rs1654553	Analyzed	19	56102928	KLK4	KLK4	g.IVS4+499A>G		C	T	0.1067	0.2677	0.6399	0.7956
rs10058233	Analyzed	5	66534239	CD180	CD180	g.-6013G>A		C	T	0.3267	1	0.7503	0.7964
rs366510	Analyzed	19	6648829	C3	C3	g.IVS19-24C>A		G	T	0.12	0.3442	0.6915	0.7966
rs2838739	Analyzed	21	45169078	ITGB2	ITGB2	g.-13952T>C		G	A	0.4533	0.09647	0.8633	0.798
rs2838733	Analyzed	21	45148159	ITGB2	ITGB2	g.IVS4-281A>G		C	T	0.3929	0.4406	0.7294	0.7993
rs7183	Analyzed	12	7048280	C1S	C1S	g.Ex12-318G>T		T	G	0.09211	0.1918	0.6105	0.7997
rs16833215	Analyzed	2	191622044	STAT1/STAT4	STAT4	g.IVS14+5417T>C		G	A	0.4467	0.5088	0.7731	0.7998
rs2531863	Analyzed	17	23161677	NOS2A	NOS2A	g.-11714T>C		A	G	0.2333	1	0.7764	0.8007
rs3824612	Analyzed	10	45192870	ALOX5	ALOX5	g.IVS1+2987C>T		C	T	0.4153	0.6979	0.7789	0.8038
rs3917740	Analyzed	1	167845890	SELP	SELP	g.IVS7-339C>T		A	G	0.2067	0.6578	0.7738	0.8052
rs4611572	Analyzed	19	10318917	ICAM3	ICAM3	g.*3592C>G		C	G	0.42	0.3165	0.7526	0.8061
rs1848450	Analyzed	3	188414566	MASP1	MASP1	g.*5986A>G		C	T	0.14	1	0.757	0.8069
rs2227667	Analyzed	7	100561469	SERPINE1	SERPINE1	g.IVS3-407A>G		G	A	0.473	0.7483	0.7308	0.8072
rs1879417	Analyzed	12	116287898	NOS1	NOS1	g.-34640G>A		C	T	0.473	0.1797	0.7196	0.8078
rs13340508	Analyzed	7	75275621	CCL24	CCL24	g.*3428G>A		C	T	0.3378	0.7282	0.7396	0.808
rs3782928	Analyzed	12	7139817	C1RL	C1RL	g.Ex6+1085A>G		T	C	0.1579	0.5697	0.6412	0.809
rs2741109	Analyzed	8	6712025	DEFB1	DEFB1	g.*3587T>C		A	G	0.1867	0.565	0.726	0.8113
rs6895161	Analyzed	5	156899142	ADAM19	ADAM19	g.IVS3-1565G>A		T	C	0.1447	1	0.6339	0.8117
rs4427917	Analyzed	19	52507555	C5R1	C5R1	g.IVS1+2560G>C		G	C	0.44	0.5084	0.8557	0.8123
rs7295972	Analyzed	12	116231751	NOS1	NOS1	g.IVS3+1903T>C		A	G	0.3933	1	0.7677	0.8138
rs348337	Analyzed	19	6481656	TNFSF9	TNFSF9	g.-391C>T		T	C	0.2877	0.4014	0.8119	0.8139
rs4393129	Analyzed	1	86702501	CLCA1/CLCA2	CLCA1	g.-4741C>T		C	T	0.4	1	0.8415	0.8141
rs17054657	Analyzed	5	156860453	ADAM19	ADAM19	g.IVS12-1205G>A		T	C	0.1447	0.4929	0.6517	0.8144
rs3780906	Analyzed	10	45241988	ALOX5	ALOX5	g.IVS6+1402A>G		A	G	0.1711	1	0.6473	0.8158
rs2509963	Analyzed	11	61949507	SCGB1A1	SCGB1A1	g.*2367T>C		T	C	0.38	0.3205	0.7617	0.8194
rs17054692	Analyzed	5	156894979	ADAM19	ADAM19	g.IVS4+2520T>C		G	A	0.1333	0.066	0.703	0.8201
rs12087872	Analyzed	1	205373156	C4BPA/C4BPB	C4BPA	g.IVS8-1216A>G		G	A	0.3	1	0.7838	0.821
rs2738163	Analyzed	8	6732626	DEFB1	DEFB1	g.-9836A>G		T	C	0.4	0.1633	0.8531	0.8214
rs9911644	Analyzed	17	7912426	ALOX12B/ALOX15B	ALOX12B	g.*4387T>C		A	G	0.3378	0.7139	0.8269	0.8245
rs6751855	Analyzed	2	191593016	STAT1/STAT4	STAT1	g.-10041T>C		A	G	0.1333	0.4237	0.6883	0.8246
rs2664152	Analyzed	19	56106962	KLK4	KLK4	g.-1155C>A		G	T	0.1579	0.1471	0.6581	0.8267
rs13034664	Analyzed	2	228380823	CCL20	CCL20	g.-6048A>G		A	G	0.1842	0.2739	0.6676	0.8276
rs2753377	Analyzed	1	86711428	CLCA1/CLCA2	CLCA1	g.IVS2-260T>A		T	A	0.1467	0.1045	0.7131	0.828
rs2758352	Analyzed	6	160042911	SOD2	SOD2	g.-8721T>C		A	G	0.4189	0.4943	0.7858	0.8284
rs470681	Analyzed	18	72846925	MBP	MBP	g.IVS5+3868G>A		C	T	0.4384	0.3206	0.8653	0.8295
rs921336	Analyzed	18	72861460	MBP	MBP	g.IVS3-3248C>A		T	G	0.4189	0.7449	0.7739	0.8296
rs1422795	Analyzed	5	156868942	ADAM19	ADAM19	g.Ex9-56A>G	p.S284G	C	T	0.1842	1	0.6811	0.8304
rs2779252	Analyzed	17	23155497	NOS2A	NOS2A	g.-5534C>A		T	G	0.2632	0.2255	0.6763	0.8344
rs10856839	Analyzed	4	38453631	TLR1/TLR10/TLR6	TLR10	g.Ex4+38A>C		G	T	0.1974	1	0.6841	0.8347
rs545654	Analyzed	12	116261432	NOS1	NOS1	g.IVS1-7755G>A		T	C	0.2368	0.3979	0.6763	0.8357
rs230510	Analyzed	4	103695201	NFKB1	NFKB1	g.IVS5-11979A>T		T	A	0.4667	0.745	0.8562	0.8359
rs2649663	Analyzed	11	57113881	SERPING1	LOC390183	g.NC_-12807T>C		G	A	0.1711	0.03005	0.6898	0.8368
rs532967	Analyzed	12	116216722	NOS1	NOS1	g.IVS3-4108T>C		A	G	0.1842	1	0.6811	0.8375
rs5743899	Analyzed	11	1280140	TOLLIP	TOLLIP	g.IVS1-6540G>A		C	T	0.2105	0.3051	0.6735	0.838
rs2289278	Analyzed	5	110437047	TSLP	TSLP	g.Ex3+123C>G		G	C	0.1974	0.5805	0.6841	0.8384
rs723858	Analyzed	1	171284886	TNFSF18	TNFSF18	g.IVS1+1618A>T		T	A	0.2632	0.2255	0.6763	0.8405
rs941989	Analyzed	1	172148494	SERPINC1	SERPINC1	g.IVS2-719G>A		C	T	0.34	1	0.7804	0.8443
rs4952236	Analyzed	2	31498443	XDH	XDH	g.-7406C>A		T	G	0.2733	0.1116	0.7982	0.8448
rs4592765	Analyzed	19	56151843	KLK6/KLK7	KLK6/KLK7	g.*2388G>A		T	C	0.25	1	0.7003	0.8479
rs470498	Analyzed	18	72840709	MBP	MBP	g.IVS5-9705G>C		G	C	0.4667	0.04567	0.8703	0.8491
rs9900213	Analyzed	17	37629407	STAT5B	STAT5B	g.IVS4-307C>A		T	G	0.2632	0.3979	0.7192	0.8504
rs348390	Analyzed	19	6487662	TNFSF9	TNFSF9	g.*1584A>G		G	A	0.2105	0.05952	0.7081	0.8508
rs6747563	Analyzed	2	95046847	MAL	MAL	g.-8417A>G		A	G	0.2267	0.1643	0.7642	0.8508
rs11927882	Analyzed	3	133788881	ACAD11	ACAD11	g.IVS13-7789C>T		G	A	0.2162	0.6232	0.8306	0.8509
rs17258746	Analyzed	1	205319270	PFKFB2	PFKFB2	g.Ex16+349T>A		A	T	0.05405	1	0.9355	0.8515
rs3867263	Analyzed	18	59482590	SERPINB3	SERPINB3	g.-3159A>G		T	C	0.2895	0.6911	0.6978	0.8518
rs11466741	Analyzed	5	110436604	TSLP	TSLP	g.IVS2+75C>T		T	C	0.24	0.6646	0.7904	0.8519
rs9607432	Analyzed	22	35960429	RAC2	RAC2	g.IVS2-1525A>G		C	T	0.2467	0.6691	0.7806	0.852
rs6490121	Analyzed	12	116192578	NOS1	NOS1	g.IVS10+1995C>T		G	A	0.3378	0.7139	0.8223	0.8526
rs6434435	Analyzed	2	191662109	STAT1/STAT4	STAT4	g.IVS3-12813C>T		A	G	0.2133	0.1643	0.9311	0.8536
rs2040049	Analyzed	14	51795838	PTGDR	PTGDR	g.-8444T>A		T	A	0.1842	0.05199	0.7039	0.8543
rs4288398	Analyzed	8	6869048	DEFA3	DEFA3	g.-7265T>C		A	G	0.3421	0.7303	0.7075	0.8553
rs308379	Analyzed	4	124002346	FGF2	FGF2	g.IVS1-14580A>T		A	T	0.3784	1	0.7733	0.8557
rs4853546	Analyzed	2	191717897	STAT1/STAT4	STAT4	g.IVS3+1687T>C		A	G	0.2763	0.4595	0.7093	0.8557
rs2838735	Analyzed	21	45159710	ITGB2	ITGB2	g.IVS1-4582A>G		C	T	0.3947	0.1843	0.7178	0.8562
rs12728761	Analyzed	1	86700433	CLCA1/CLCA2	CLCA2	g.*6634C>G		C	G	0.05333	1	0.9682	0.8587
rs3753276	Analyzed	1	86704853	CLCA1/CLCA2	CLCA1	g.-2389T>C		C	T	0.05333	1	0.9682	0.8587
rs926065	Analyzed	1	86714076	CLCA1/CLCA2	CLCA1	g.IVS4-643G>T		G	T	0.05333	1	0.9682	0.8587
rs10745657	Analyzed	12	92497632	SOCS2	SOCS2	g.*4545A>G		G	A	0.2368	0.1907	0.7192	0.8589
rs2075821	Analyzed	7	30457836	CARD4	CARD4	g.Ex6-480G>A	p.A574A	T	C	0.3816	1	0.7226	0.8593
rs1254609	Analyzed	14	51808218	PTGDR	PTGDR	g.IVS1-2981A>G		G	A	0.24	0.3548	0.7767	0.8602
rs1041163	Analyzed	1	100956413	VCAM1	VCAM1	g.-1591C>T		C	T	0.1533	1	0.87	0.8609
rs308388	Analyzed	4	124006529	FGF2	FGF2	g.IVS1-10397G>A		A	G	0.4079	1	0.7212	0.861
rs1341022	Analyzed	20	36365965	BPI/LBP	BPI/LBP	g.-62C>G		G	C	0.4474	1	0.7359	0.8627
rs5085	Analyzed	1	159459135	FCER1G	APOA2	g.IVS3+197G>C		G	C	0.2867	0.004561	0.7941	0.8627
rs2753384	Analyzed	1	86713460	CLCA1/CLCA2	CLCA1	g.IVS4-1259C>T		T	C	0.4211	1	0.7392	0.8633
rs3804100	Analyzed	4	154844859	TLR2	TLR2	g.Ex3+1366T>C	p.S450S	C	T	0.3289	0.7226	0.7281	0.8633
rs3935644	Analyzed	13	30235640	ALOX5AP	ALOX5AP	g.IVS4-441G>A		G	A	0.4933	0.1861	0.8799	0.8646
rs2149356	Analyzed	9	119514020	TLR4	TLR4	g.IVS3-468T>G		T	G	0.3816	0.7261	0.738	0.8648
rs230540	Analyzed	4	103715705	NFKB1	NFKB1	g.IVS6-1366T>C		C	T	0.3421	0.4828	0.7403	0.8648
rs2305623	Analyzed	3	133804952	ACAD11	ACAD11	g.IVS12-91A>C		T	G	0.3553	1	0.7376	0.8648
rs4151657	Analyzed	6	32025519	C2	BF	g.IVS10+206T>C		C	T	0.3667	0.07819	0.7684	0.8667
rs6600832	Analyzed	4	71388097	MUC7	MUC7	g.*5912C>T		C	T	0.2568	0.07766	0.8441	0.8669
rs1434789	Analyzed	20	85900	DEFB127	DEFB127	g.-285G>T		G	T	0.3816	0.5024	0.738	0.8672
rs3813729	Analyzed	12	7133345	C1RL	C1RL	g.*6783G>A		T	C	0.3421	1	0.7332	0.8681
rs9680849	Analyzed	22	35580403	NCF4	NCF4	g.-6756A>T		A	T	0.07333	0.1341	0.8003	0.8682
rs1321690	Analyzed	1	86732012	CLCA1/CLCA2	CLCA1	g.IVS11+142C>A		C	A	0.2763	0.08333	0.7345	0.87
rs1431991	Analyzed	17	29706619	CCL2/CCL7/CCL11/CCL8/CCL13/CCL1	CCL2/CCL7/CCL11/CCL8/CCL13/CCL1	g.-1039A>G		A	G	0.4133	1	0.8465	0.8702
rs4656108	Analyzed	1	86697988	CLCA1/CLCA2	CLCA2	g.*4189A>G		A	G	0.3816	0.7261	0.7447	0.872
rs6503080	Analyzed	17	7944237	ALOXE3	ALOXE3	g.IVS14+3129G>A		C	T	0.3684	0.478	0.748	0.8726
rs739043	Analyzed	22	35975176	RAC2	RAC2	g.-5041T>C		G	A	0.3816	0.2915	0.7447	0.8749
rs1321695	Analyzed	1	86720335	CLCA1/CLCA2	CLCA1	g.IVS5-141C>A		A	C	0.4667	0.5088	0.8671	0.8757
rs2734690	Analyzed	1	86717023	CLCA1/CLCA2	CLCA1	g.IVS5+2199G>A		A	G	0.4605	0.3452	0.7563	0.8757
rs11132383	Analyzed	4	187419654	KLKB1	KLKB1	g.*3293C>T		T	C	0.3553	0.01221	0.7566	0.8765
rs1884655	Analyzed	20	23022375	C1QR1	C1QR1	g.-7545T>C		G	A	0.2067	1	0.9009	0.8779
rs925847	Analyzed	2	191605785	STAT1/STAT4	STAT4	g.IVS21+144G>A		C	T	0.4868	0.3422	0.7575	0.8781
rs8094402	Analyzed	18	72836437	MBP	MBP	g.IVS5-5433T>C		G	A	0.07333	1	0.7806	0.88
rs6690827	Analyzed	1	22840083	C1QA/C1QG/C1QB	C1QA	g.*1595A>G		A	G	0.4595	0.5164	0.7699	0.8805
rs5756372	Analyzed	22	35579437	NCF4	NCF4	g.-7722C>G		G	C	0.07333	1	0.7806	0.8808
rs12296430	Analyzed	12	6373761	LTBR	LTBR	g.*3396C>G		C	G	0.08108	0.2021	0.9255	0.8817
rs5995355	Analyzed	22	35581407	NCF4	NCF4	g.-5752A>G		G	A	0.06667	0.1341	0.9674	0.8818
rs3755867	Analyzed	4	103745712	NFKB1	NFKB1	g.IVS16-979A>G		G	A	0.3514	0.7139	0.9204	0.8826
rs4968212	Analyzed	17	7408940	SENP3	SENP3	g.IVS3+35T>C		T	C	0.4863	0.1739	0.7722	0.8832
rs1450665	Analyzed	5	41016860	C7	C7	g.IVS17-391G>T		T	G	0.2432	0.6532	0.8644	0.8834
rs3181049	Analyzed	19	10302117	ICAM3	ICAM3	g.IVS2+19C>T		A	G	0.06667	0.1341	0.9674	0.8849
rs8100631	Analyzed	19	56115358	KLK4	KLK4	g.-9551G>A		C	T	0.1081	1	0.9028	0.8868
rs16938755	Analyzed	8	75066690	LY96	LY96	g.IVS1+347T>C		C	T	0.08667	1	0.8009	0.8869
rs3027215	Analyzed	17	7959231	ALOXE3	ALOXE3	g.IVS3-131G>A		T	C	0.06081	1	0.7507	0.8875
rs4862633	Analyzed	4	187246966	TLR3	TLR3	g.*3944C>T		T	C	0.08108	0.2021	0.9255	0.8887
rs281438	Analyzed	19	10260375	ICAM1/ICAM4/ICAM5	ICAM1/ICAM4/ICAM5	g.*594G>T		G	T	0.1067	1	0.952	0.8901
rs11465254	Analyzed	5	156926609	ADAM19	ADAM19	g.IVS2-2580G>A		T	C	0.06757	0.1378	0.934	0.8905
rs1799983	Analyzed	7	150327044	NOS3	NOS3	g.Ex8-63T>G	p.D298E	T	G	0.08475	0.1767	0.874	0.8932
rs911248	Analyzed	1	57165097	C8A/C8B	C8B	g.*2567A>C		G	T	0.4324	0.1005	0.9623	0.8939
rs7746553	Analyzed	6	32003952	C2	C2	g.IVS2+32C>G		G	C	0.09333	1	0.9593	0.8944
rs17121283	Analyzed	12	42471860	IRAK4	PTK9	g.*3794G>A		T	C	0.09333	1	0.9593	0.8969
rs2734335	Analyzed	6	32001923	C2	C2	g.-1585G>A		G	A	0.1986	1	0.9049	0.8982
rs2254073	Analyzed	16	87233305	CYBA	IL17C	g.IVS2+87T>C		T	C	0.1757	0.5662	0.8641	0.8992
rs1476002	Analyzed	22	35960734	RAC2	RAC2	g.IVS2-1830A>G		T	C	0.1667	0.5611	0.8703	0.9035
rs3758919	Analyzed	11	57119379	SERPING1	LOC390183	g.NC_-18305C>T		A	G	0.1333	0.5035	0.9479	0.9044
rs7968584	Analyzed	12	7042502	C1S	C1S	g.IVS5-163C>T		T	C	0.1133	0.3442	0.8518	0.9047
rs3935645	Analyzed	13	30235558	ALOX5AP	ALOX5AP	g.IVS4-523T>C		C	T	0.2533	0.3933	0.9189	0.9048
rs2838734	Analyzed	21	45154168	ITGB2	ITGB2	g.IVS3+459A>G		C	T	0.3867	0.3205	0.8898	0.9062
rs6503691	Analyzed	17	37647616	STAT5B	STAT5B	g.IVS1-9935G>A		T	C	0.24	1	0.9286	0.9062
rs10824801	Analyzed	10	54211072	MBL2	MBL2	g.-9670T>A		A	T	0.42	0.09746	0.9793	0.9076
rs4496877	Analyzed	7	150311439	NOS3	NOS3	g.-10385G>T		T	G	0.1267	1	0.861	0.9082
rs12756603	Analyzed	1	22854463	C1QA/C1QG/C1QB	C1QG	g.*7599A>G		G	A	0.1622	0.2258	0.8852	0.9088
rs698092	Analyzed	3	188452328	MASP1	MASP1	g.IVS6-94T>C		A	G	0.4865	1	0.993	0.9093
rs1388604	Analyzed	3	46251882	CCR1/CCR3	CCR3	g.-29771T>A		A	T	0.2067	0.304	0.8906	0.9098
rs10759930	Analyzed	9	119501442	TLR4	TLR4	g.-5129C>T		C	T	0.3919	0.7302	0.9413	0.9102
rs872066	Analyzed	3	39343525	CCR8	CCR8	g.-5301A>G		G	A	0.1333	0.5035	0.9508	0.9102
rs720511	Analyzed	3	188414735	MASP1	MASP1	g.*5817T>C		A	G	0.3958	0.4845	0.8548	0.9107
rs4656308	Analyzed	1	159745375	FCGR2A	FCGR2A	g.IVS3-859C>T		C	T	0.1554	1	0.8224	0.9131
rs6503076	Analyzed	17	7921627	ALOX12B/ALOX15B	ALOX12B	g.IVS8-391G>A		C	T	0.4521	0.5001	0.8736	0.9131
rs4503649	Analyzed	13	30212174	ALOX5AP	ALOX5AP	g.IVS1-4023G>A		A	G	0.473	0.5164	0.987	0.9132
rs1780627	Analyzed	20	36431046	BPI/LBP	BPI/LBP	g.IVS9-7T>C		T	C	0.1733	0.05608	0.9468	0.9144
rs12980031	Analyzed	19	7670436	FCER2	FCER2	g.IVS2+189C>A		G	T	0.1486	0.1623	0.8978	0.9154
rs3729790	Analyzed	7	6393479	RAC1	RAC1	g.IVS3+40G>A		A	G	0.2162	0.6562	0.8542	0.9173
rs12943817	Analyzed	17	7915559	ALOX12B/ALOX15B	ALOX12B	g.*1254G>A		T	C	0.2162	0.6562	0.8542	0.9182
rs622299	Analyzed	1	57100710	C8A/C8B	C8A	g.IVS1-5160C>T		C	T	0.12	1	0.9569	0.9208
rs718226	Analyzed	16	49327064	CARD15	CARD15	g.*3832A>G		G	A	0.2733	0.3983	0.9386	0.9212
rs1979672	Analyzed	3	46249113	CCR1/CCR3	CCR3	g.-32540A>G		G	A	0.2365	0.6516	0.8397	0.922
rs2287868	Analyzed	19	7670772	FCER2	FCER2	g.IVS1-41A>G		T	C	0.3733	0.07819	0.9085	0.9232
rs2761435	Analyzed	1	205985089	MCP	MCP	g.-7091C>G		C	G	0.1533	1	0.8823	0.9239
rs2241393	Analyzed	19	6636304	C3	C3	g.IVS29-147C>G		G	C	0.3533	1	0.9583	0.9254
rs764916	Analyzed	5	110428090	TSLP	TSLP	g.-7397C>G		C	G	0.4933	0.742	0.8804	0.9261
rs6054706	Analyzed	20	77864	DEFB126	DEFB126	g.*3530C>T		T	C	0.4867	0.5098	0.9966	0.929
rs7797547	Analyzed	7	75275736	CCL24	CCL24	g.*3313T>C		G	A	0.4467	0.3452	0.9867	0.9292
rs2455307	Analyzed	5	40965300	C7	C7	g.IVS2+806G>A		A	G	0.3133	0.4398	0.9486	0.9297
rs206855	Analyzed	2	31470647	XDH	XDH	g.IVS6+3391T>A		T	A	0.3533	0.2967	0.9608	0.9307
rs206858	Analyzed	2	31472771	XDH	XDH	g.IVS6+1267C>G		C	G	0.3533	0.2967	0.9608	0.9307
rs312462	Analyzed	17	6854376	ALOX12	ALOX12	g.Ex14+90G>A	p.L634L	A	G	0.1667	1	0.8834	0.9308
rs6024718	Analyzed	20	36366467	BPI/LBP	BPI/LBP	g.IVS1+298A>G		A	G	0.3446	0.7119	0.8548	0.9313
rs3917012	Analyzed	1	100968247	VCAM1	VCAM1	g.IVS5+721G>T		G	T	0.2133	1	0.9311	0.9333
rs11737764	Analyzed	4	124046230	FGF2	NUDT6	g.IVS4+6943A>G		T	C	0.06081	1	0.7877	0.9335
rs13395505	Analyzed	2	191546759	STAT1/STAT4	STAT1	g.IVS24+1042C>T		G	A	0.4933	1	0.8744	0.9336
rs12638201	Analyzed	3	45909283	CCR9	CCR9	g.IVS1-2119G>A		A	G	0.06081	1	0.7877	0.934
rs10504554	Analyzed	8	75082267	LY96	LY96	g.IVS2-2523T>C		C	T	0.09286	0.01022	0.8898	0.9359
rs4890788	Analyzed	18	72853245	MBP	MBP	g.IVS4+482G>A		T	C	0.1689	0.5595	0.9429	0.9391
rs1780624	Analyzed	20	36422716	BPI/LBP	BPI/LBP	g.IVS5-56C>G		C	G	0.06081	1	0.7877	0.9392
rs2071409	Analyzed	17	53703229	MPO	MPO	g.IVS11-6A>C		G	T	0.08	0.1968	0.9633	0.9431
rs4028634	Analyzed	17	38089175	CNTNAP1	CNTNAP1	g.IVS1-190T>C		C	T	0.4533	1	0.877	0.9453
rs1697143	Analyzed	5	66516825	CD180	CD180	g.IVS2+610C>A		T	G	0.1164	1	0.8318	0.947
rs4821609	Analyzed	22	35948024	RAC2	RAC2	g.*4634T>C		A	G	0.14	0.5035	0.8618	0.9476
rs10095331	Analyzed	8	6901260	DEFA5	DEFA5	g.IVS1+198T>C		A	G	0.1467	0.1544	0.9471	0.9486
rs991804	Analyzed	17	29611838	CCL2/CCL7/CCL11/CCL8/CCL13/CCL1	CCL2/CCL7/CCL11/CCL8/CCL13/CCL1	g.*3878T>C		C	T	0.3581	1	0.94	0.949
rs2494250	Analyzed	1	157544875	FCER1A	FCER1A	g.*528C>G		G	C	0.2067	1	0.905	0.9493
rs4686864	Analyzed	3	188459685	MASP1	MASP1	g.IVS4+1538C>T		A	G	0.1067	0.3442	0.9582	0.9522
rs700239	Analyzed	5	39409446	C9	DAB2	g.IVS14-162G>T		A	C	0.3851	1	0.9251	0.9523
rs2373961	Analyzed	7	150312143	NOS3	NOS3	g.-9681T>C		T	C	0.1333	1	0.9479	0.9525
rs12948058	Analyzed	17	29634980	CCL2/CCL7/CCL11/CCL8/CCL13/CCL1	CCL2/CCL7/CCL11/CCL8/CCL13/CCL1	g.-1960A>G		A	G	0.32	1	0.9058	0.9541
rs389883	Analyzed	6	32055439	C2	STK19	g.IVS5+130G>T		G	T	0.277	1	0.9848	0.958
rs2304595	Analyzed	4	187409274	KLKB1	KLKB1	g.IVS7-93G>A		A	G	0.3	0.04426	0.9468	0.9591
rs17226566	Analyzed	8	75082466	LY96	LY96	g.IVS2-2324T>C		C	T	0.1014	1	0.8735	0.9593
rs850316	Analyzed	3	188430846	MASP1	MASP1	g.IVS12-467C>T		A	G	0.277	0.2269	0.9832	0.9603
rs2293054	Analyzed	12	116186097	NOS1	NOS1	g.Ex13-21T>C	p.I734I	A	G	0.1867	1	0.9359	0.9641
rs13407419	Analyzed	2	191676665	STAT1/STAT4	STAT4	g.IVS3-27369A>C		G	T	0.16	0.5611	0.946	0.9644
rs12601982	Analyzed	17	37715200	STAT3/STAT5A	STAT3/STAT5A	g.IVS19+172A>G		G	A	0.3403	0.7061	0.9503	0.9678
rs10267377	Analyzed	7	30437394	CARD4	CARD4	g.IVS12-1796C>G		C	G	0.3133	1	0.947	0.9701
rs9797244	Analyzed	17	23121258	NOS2A	NOS2A	g.IVS15-521A>G		C	T	0.1284	0.4337	0.9035	0.9714
rs12621192	Analyzed	2	31442168	XDH	XDH	g.IVS22+178G>A		T	C	0.46	0.04567	0.9905	0.9719
rs457414	Analyzed	3	10177884	IRAK2	IRAK2	g.-3754A>C		C	A	0.2877	0.6877	0.9552	0.9719
rs11921535	Analyzed	3	168943077	SERPINI1	SERPINI1	g.IVS1+6460G>A		A	G	0.32	0.2637	0.9089	0.9729
rs805287	Analyzed	6	31786709	LY6G6D	LY6G6D	g.-4402G>A		G	A	0.3986	0.7333	0.9162	0.9729
rs2734697	Analyzed	1	86721371	CLCA1/CLCA2	CLCA1	g.IVS6+718A>T		A	T	0.3933	0.1633	0.9739	0.973
rs714910	Analyzed	17	29641378	CCL2/CCL7/CCL11/CCL8/CCL13/CCL1	CCL2/CCL7/CCL11/CCL8/CCL13/CCL1	g.*2555A>C		A	C	0.3667	1	0.9628	0.9732
rs16994490	Analyzed	20	77063	DEFB126	DEFB126	g.*2729A>G		G	A	0.3467	1	0.9079	0.9759
rs2190970	Analyzed	17	29618776	CCL2/CCL7/CCL11/CCL8/CCL13/CCL1	CCL2/CCL7/CCL11/CCL8/CCL13/CCL1	g.-2646T>C		C	T	0.1554	0.1623	0.9355	0.9764
rs17040	Analyzed	3	188420262	MASP1	MASP1	g.Ex18+482T>C		A	G	0.1284	0.4337	0.9035	0.9767
rs1860190	Analyzed	17	29600686	CCL2/CCL7/CCL11/CCL8/CCL13/CCL1	CCL2/CCL7/CCL11/CCL8/CCL13/CCL1	g.-5795T>A		T	A	0.36	1	0.9004	0.9778
rs7674640	Analyzed	4	103759828	NFKB1	NFKB1	g.*3030C>T		T	C	0.4133	0.7417	0.8915	0.9783
rs1152918	Analyzed	12	64922569	IRAK3	IRAK3	g.IVS8-1964T>C		T	C	0.42	1	0.9781	0.9819
rs12693591	Analyzed	2	191568747	STAT1/STAT4	STAT1	g.IVS9-557G>T		A	C	0.16	0.5611	0.9434	0.9825
rs2739476	Analyzed	19	56065630	KLK2	KLK2	g.-2911A>G		A	G	0.223	0.3238	0.9838	0.9835
rs2838729	Analyzed	21	45143845	ITGB2	ITGB2	g.IVS7-340T>C		A	G	0.2877	0.2197	0.9586	0.9877
rs4445746	Analyzed	13	30239435	ALOX5AP	ALOX5AP	g.*3191A>G		A	G	0.223	1	0.9832	0.9887
rs2293152	Analyzed	17	37735055	STAT3/STAT5A	STAT3/STAT5A	g.IVS13+43C>G		G	C	0.4267	0.01782	0.8826	0.9942
rs12984649	Analyzed	19	7667456	FCER2	FCER2	g.IVS8+255C>T		A	G	0.2467	1	0.9272	0.9954
rs4656699	Analyzed	1	167954183	SELE	SELE	g.*7325G>A		T	C	0.22	1	0.9133	0.9976
rs6696110	Analyzed	1	57131749	C8A/C8B	C8A	g.IVS7+7321T>G		G	T	0.1133	1	0.8597	0.998
rs2205850	Analyzed	1	167958063	SELE	SELE	g.*3445C>T		G	A	0.2905	0.4366	0.9778	0.9992
rs879537	Analyzed	3	188478789	MASP1	MASP1	g.IVS2+7518T>A		T	A	0.1467	0.1544	0.9518	0.9995
rs2159776	Analyzed	9	122795981	C5	C5	g.IVS22+2358G>A		C	T	0.3933	1	0.9719	0.9999
rs10203061	Analyzed	2	68135263	C1D	C1D	g.IVS1-7308T>C		G	A	0.3092	0.7059	0.8637	1
rs1039559	Analyzed	4	38507991	TLR1/TLR10/TLR6	TLR6	g.-501C>T		G	A	0.3446	1	0.9465	1
rs1046033	Analyzed	5	39407907	C9	DAB2	g.*2970C>T		G	A	0.2635	1	0.9913	1
rs1065205	Analyzed	18	59473975	SERPINB3	SERPINB3	g.Ex8+301A>G	p.T357A	C	T	0.4474	0.1857	1	1
rs10759932	Analyzed	9	119504965	TLR4	TLR4	g.-1606T>C		C	T	0.2237	0.3468	1	1
rs11002306	Analyzed	10	79261525	DLG5	DLG5	g.IVS8-888T>A		T	A	0.1933	0.3095	0.8844	1
rs11064497	Analyzed	12	7039922	C1S	C1S	g.IVS2-118C>T		T	C	0.08	1	0.9598	1
rs11098676	Analyzed	4	124052604	FGF2	NUDT6	g.IVS4+569A>G		T	C	0.06	1	0.7545	1
rs11176078	Analyzed	12	64861524	IRAK3	IRAK3	g.-7822C>T		C	T	0.3618	1	0.8579	1
rs11876937	Analyzed	18	55183780	LMAN1	LMAN1	g.-6323T>C		G	A	0.08	1	0.9598	1
rs12029217	Analyzed	1	159754487	FCGR2A	FCGR2A	g.Ex7+99C>T	p.P292P	T	C	0.09868	1	0.7732	1
rs1205	Analyzed	1	157948857	CRP	CRP	g.Ex2-155G>A		C	T	0.2829	1	0.8519	1
rs12327459	Analyzed	18	59484737	SERPINB3	SERPINB3	g.-5306G>A		C	T	0.125	1	0.7911	1
rs12409568	Analyzed	1	100954535	VCAM1	VCAM1	g.-3469T>G		G	T	0.06	1	0.7545	1
rs12424669	Analyzed	12	116263339	NOS1	NOS1	g.IVS1-9662G>A		T	C	0.06579	1	1	1
rs12703107	Analyzed	7	150314562	NOS3	NOS3	g.-7262G>T		G	T	0.25	0.4028	1	1
rs12709102	Analyzed	16	87239820	CYBA	CYBA	g.IVS5+205A>G		C	T	0.2568	0.3933	1	1
rs12971845	Analyzed	19	7664339	FCER2	FCER2	g.IVS8-2896A>G		C	T	0.28	1	0.9217	1
rs13072632	Analyzed	3	41237448	CTNNB1	CTNNB1	g.IVS1-3068T>C		C	T	0.2039	0.3161	0.8456	1
rs13150331	Analyzed	4	154819072	TLR2	TLR2	g.-24437A>G		A	G	0.4868	1	1	1
rs1358826	Analyzed	1	86708835	CLCA1/CLCA2	CLCA1	g.IVS2+1431T>C		T	C	0.4342	1	1	1
rs1558802	Analyzed	12	107560377	SELPLG	CORO1C	g.*4930T>A		T	A	0.3355	0.1603	0.8785	1
rs1585213	Analyzed	4	103663728	NFKB1	NFKB1	g.IVS1-1971C>T		T	C	0.4276	1	0.8665	1
rs163913	Analyzed	19	6673635	C3	C3	g.-2034G>A		C	T	0.2829	0.6911	0.8519	1
rs16851469	Analyzed	3	168995650	SERPINI1	SERPINI1	g.IVS5+344A>C		C	A	0.07237	1	0.7444	1
rs16871019	Analyzed	5	41253172	C6	C6	g.-14082T>C		G	A	0.1513	0.5631	0.8139	1
rs16957160	Analyzed	17	7935150	ALOX12B/ALOX15B	ALOX12B	g.-3664T>C		A	G	0.1513	0.5631	0.8028	1
rs17006255	Analyzed	4	124018443	FGF2	FGF2	g.IVS2+1414A>C		C	A	0.3882	0.1655	0.8355	1
rs17576751	Analyzed	18	72838031	MBP	MBP	g.IVS5-7027G>A		T	C	0.08553	1	0.7607	1
rs17576996	Analyzed	18	72851555	MBP	MBP	g.IVS4-685T>G		C	A	0.06667	1	0.9639	1
rs1800947	Analyzed	1	157950062	CRP	CRP	g.Ex2+491G>C	p.L184L	G	C	0.06667	1	0.9639	1
rs1885002	Analyzed	1	57112969	C8A/C8B	C8A	g.IVS2-241A>G		G	A	0.4342	0.7402	1	1
rs1910016	Analyzed	5	40947349	C7	C7	g.IVS1+1874C>T		C	T	0.1053	0.03621	1	1
rs1990975	Analyzed	19	7672274	FCER2	FCER2	g.IVS1+631A>G		T	C	0.1513	0.1471	0.8313	1
rs2035196	Analyzed	8	71647904	TRAM1	TRAM1	g.*1816T>G		C	A	0.12	0.4237	0.9545	1
rs2042247	Analyzed	5	156878627	ADAM19	ADAM19	g.IVS6-153T>C		G	A	0.3224	0.129	0.8701	1
rs206849	Analyzed	2	31466753	XDH	XDH	g.IVS6-2088T>C		G	A	0.4145	0.314	0.8653	1
rs2074437	Analyzed	17	5287808	C1QBP	DHX33	g.Ex12+750A>G		C	T	0.162	1	0.9946	1
rs2074724	Analyzed	7	81174201	HGF	HGF	g.IVS15+341G>A		C	T	0.1711	1	1	1
rs2115819	Analyzed	10	45221095	ALOX5	ALOX5	g.IVS3-6550A>G		A	G	0.1959	0.3051	0.9611	1
rs2239774	Analyzed	22	35967599	RAC2	RAC2	g.Ex2-27C>G	p.A27A	C	G	0.2039	0.6096	0.851	1
rs2243828	Analyzed	17	53713883	MPO	MPO	g.-764T>C		G	A	0.09589	0.2747	0.9581	1
rs2246583	Analyzed	1	86739304	CLCA1/CLCA2	CLCA1	g.*987C>G		C	G	0.2895	0.04171	1	1
rs2269066	Analyzed	9	122776839	C5	C5	g.IVS30+39G>A		T	C	0.1284	0.4337	0.909	1
rs2284659	Analyzed	4	24403895	SOD3	SOD3	g.-6346T>G		G	T	0.2632	0.2354	1	1
rs2295663	Analyzed	6	31777274	LY6G6D	BAT5	g.IVS2-178T>C		G	A	0.12	0.4237	0.9545	1
rs235328	Analyzed	21	45138385	ITGB2	ITGB2	g.IVS9-498C>G		C	G	0.28	0.1116	0.9261	1
rs243317	Analyzed	16	11264832	SOCS1	SOCS1	g.-7995T>G		A	C	0.1867	0.09002	0.9387	1
rs261752	Analyzed	5	39364263	C9	C9	g.IVS5+3272T>C		G	A	0.4539	0.7432	0.851	1
rs263410	Analyzed	3	10216987	IRAK2	IRAK2	g.IVS2-66A>C		C	A	0.3816	0.01847	1	1
rs2659056	Analyzed	19	56027755	KLK1/KLK15	KLK1/KLK15	g.-1194A>G		C	T	0.4133	0.3218	0.8885	1
rs2741688	Analyzed	8	6772762	DEFA4/DEFA6	DEFA6	g.-1794A>G		C	T	0.1711	0.05199	1	1
rs2741689	Analyzed	8	6771666	DEFA4/DEFA6	DEFA6	g.-698A>G		C	T	0.1974	0.1266	1	1
rs2796278	Analyzed	1	206022446	MCP	MCP	g.IVS9-814A>C		A	C	0.3882	0.3162	0.8731	1
rs3093024	Analyzed	6	167452783	CCR6	CCR6	g.-16829G>A		A	G	0.4737	0.1905	1	1
rs3138037	Analyzed	17	29671857	CCL2/CCL7/CCL11/CCL8/CCL13/CCL1	CCL2/CCL7/CCL11/CCL8/CCL13/CCL1	g.IVS2-77T>C		C	T	0.2365	0.6468	0.9909	1
rs3176867	Analyzed	1	100966793	VCAM1	VCAM1	g.IVS4-458C>T		T	C	0.1645	1	0.8175	1
rs3733001	Analyzed	3	188421650	MASP1	MASP1	g.IVS16-34G>A		C	T	0.3158	0.272	1	1
rs3748671	Analyzed	1	205319654	PFKFB2	PFKFB2	g.Ex16+733C>T		C	T	0.06667	1	0.9639	1
rs3760728	Analyzed	19	56066404	KLK2	KLK2	g.-2137G>C		G	C	0.4276	0.1035	0.8626	1
rs3776526	Analyzed	5	39389479	C9	C9	g.IVS1+10768A>G		C	T	0.07237	1	0.7444	1
rs3782924	Analyzed	12	7153430	C1RL	C1RL	g.-377G>A		T	C	0.2039	0.6489	0.8325	1
rs3919533	Analyzed	12	7033062	C1S	C1S	g.-6415C>T		C	T	0.07895	1	1	1
rs4076128	Analyzed	13	30203143	ALOX5AP	ALOX5AP	g.-4599A>G		G	A	0.34	1	0.9551	1
rs410236	Analyzed	1	159751260	FCGR2A	FCGR2A	g.IVS6+914C>T		C	T	0.3092	0.7059	0.8499	1
rs423490	Analyzed	19	6648406	C3	C3	g.Ex21-52T>C	p.A915A	A	G	0.07432	1	0.8348	1
rs4332159	Analyzed	8	6870259	DEFA3	DEFA3	g.-8476T>C		G	A	0.1711	0.2739	1	1
rs4401102	Analyzed	17	53715836	MPO	MPO	g.-2717G>A		T	C	0.09868	0.2611	0.7896	1
rs440555	Analyzed	21	45126170	ITGB2	ITGB2	g.*4540C>T		A	G	0.12	1	0.9483	1
rs4694178	Analyzed	4	74831552	IL8	IL8	g.*4506A>C		C	A	0.3487	0.7303	0.8598	1
rs4820274	Analyzed	22	35947090	RAC2	RAC2	g.*5568G>C		G	C	0.2961	0.2293	0.8645	1
rs5082	Analyzed	1	159460307	FCER1G	APOA2	g.-491C>T		G	A	0.05921	1	0.7226	1
rs5745646	Analyzed	7	81219262	HGF	HGF	g.Ex5+253G>A		C	T	0.1579	0.5631	1	1
rs6014804	Analyzed	20	36414852	BPI/LBP	BPI/LBP	g.IVS3-1246G>C		C	G	0.05921	1	0.7226	1
rs629409	Analyzed	1	22859325	C1QA/C1QG/C1QB	C1QB	g.IVS1-567C>T		T	C	0.2434	1	0.8348	1
rs6502097	Analyzed	17	77879468	CD7/SECTM1	CD7/SECTM1	g.IVS1-1011G>C		C	G	0.1944	0.3051	1	1
rs6503075	Analyzed	17	7919476	ALOX12B/ALOX15B	ALOX12B	g.IVS12+162C>T		A	G	0.3667	1	0.9639	1
rs6605579	Analyzed	8	6872534	DEFA3	DEFA3	g.-10751T>G		A	C	0.2632	0.2354	1	1
rs6826961	Analyzed	4	71381290	MUC7	MUC7	g.Ex3+186C>G	p.N80K	G	C	0.3289	1	1	1
rs6844764	Analyzed	4	187418527	KLKB1	KLKB1	g.*2166C>G		G	C	0.3618	0.03128	0.8762	1
rs698090	Analyzed	3	188446994	MASP1	MASP1	g.IVS9+306G>A		C	T	0.3158	0.272	1	1
rs700238	Analyzed	5	39404860	C9	DAB2	g.*6017G>C		G	C	0.1184	1	1	1
rs7044464	Analyzed	9	119521218	TLR4	TLR4	g.*4470A>T		A	T	0.1053	1	1	1
rs743507	Analyzed	7	150338421	NOS3	NOS3	g.IVS21+113C>T		C	T	0.2368	1	1	1
rs7657186	Analyzed	4	187231033	TLR3	TLR3	g.IVS1+3637G>A		A	G	0.09211	0.2611	1	1
rs8090438	Analyzed	18	72836100	MBP	MBP	g.IVS5-5096T>A		T	A	0.2267	0.649	0.9271	1
rs885691	Analyzed	17	29665338	CCL2/CCL7/CCL11/CCL8/CCL13/CCL1	CCL2/CCL7/CCL11/CCL8/CCL13/CCL1	g.-5295T>C		T	C	0.07237	1	0.7444	1
rs9292794	Analyzed	5	40952501	C7	C7	g.IVS1+7026T>C		C	T	0.3092	0.4428	0.8637	1
rs9313634	Analyzed	5	156897172	ADAM19	ADAM19	g.IVS4+327G>A		T	C	0.2829	0.4186	0.8611	1
rs9858935	Analyzed	3	169004035	SERPINI1	SERPINI1	g.IVS5-3691G>A		A	G	0.05921	1	0.7226	1
rs10025405	Failed Validation	4	187243800	TLR3	TLR3	g.*778A>G		-	-	-	-	-	-
rs10027153	Monomorphism	4	71362887	MUC7	MUC7	g.-11440T>C		-	T	0	1	-	-
rs10067096	MAF<0.05	5	156849918	ADAM19	ADAM19	g.Ex19-23T>G	p.S740A	C	A	0.01316	1	-	-
rs1013579	Monomorphism	1	57195072	C8A/C8B	C8B	g.Ex3-43G>A	p.G117R	-	T	0	1	-	-
rs10402563	MAF<0.05	19	17825955	JAK3	JAK3	g.-9728T>G		A	C	0.01333	1	-	-
rs10420003	MAF<0.05	19	56113791	KLK4	KLK4	g.-7984G>A		T	C	0.03947	1	-	-
rs10427094	MAF<0.05	19	56114689	KLK4	KLK4	g.-8882G>A		T	C	0.04054	1	-	-
rs10454970	MAF<0.05	5	156885525	ADAM19	ADAM19	g.IVS5+4868C>T		A	G	0.04667	1	-	-
rs10496160	MAF<0.05	2	68127355	C1D	C1D	g.IVS2-309C>G		C	G	0.006579	1	-	-
rs10506481	MAF<0.05	12	64930378	IRAK3	IRAK3	g.*2159C>T		C	T	0.006667	1	-	-
rs1050813	Monomorphism	7	100568335	SERPINE1	SERPINE1	g.Ex9-692G>A		-	G	0	1	-	-
rs10512765	Monomorphism	5	41247884	C6	C6	g.IVS1+1351C>T		-	G	0	1	-	-
rs10513634	MAF<0.05	3	169010480	SERPINI1	SERPINI1	g.IVS6+2657T>A		A	T	0.01333	1	-	-
rs10514234	MAF<0.05	18	72844737	MBP	MBP	g.IVS5+6056A>G		C	T	0.02	1	-	-
rs10739585	MAF<0.05	9	122849360	C5	C5	g.IVS1-878C>G		G	C	0.01333	1	-	-
rs10794293	Monomorphism	11	1088939	MUC6	MUC6	g.-62226G>A		-	C	0	1	-	-
rs10797890	Failed Validation	1	181830332	NCF2	NCF2	g.-4244G>A		-	-	-	-	-	-
rs10850803	MAF<0.05	12	116166212	NOS1	NOS1	g.IVS18-589T>C		G	A	0.02703	1	-	-
rs10902089	MAF<0.05	11	1084357	MUC6	MUC6	g.-57644T>C		G	A	0.0339	1	-	-
rs10947541	MAF<0.05	6	35378191	DEF6	DEF6	g.IVS1+4484G>A		A	G	0.006849	1	-	-
rs10983754	Monomorphism	9	119498428	TLR4	TLR4	g.-8143C>T		-	C	0	1	-	-
rs11080358	MAF<0.05	17	23154723	NOS2A	NOS2A	g.-4760T>C		A	G	0.02	1	-	-
rs11134788	MAF<0.05	5	156875253	ADAM19	ADAM19	g.IVS7-2162T>G		C	A	0.04	1	-	-
rs11134799	MAF<0.05	5	156890868	ADAM19	ADAM19	g.IVS4-399A>G		C	T	0.02667	0.0005788	-	-
rs11137085	Failed Validation	8	6864878	DEFA3	DEFA3	g.-3095G>C		-	-	-	-	-	-
rs11239524	MAF<0.05	10	45232777	ALOX5	ALOX5	g.IVS4+5010T>G		G	T	0.02083	1	-	-
rs11245935	MAF<0.05	11	1073946	MUC6	MUC6	g.-47233G>A		T	C	0.02542	1	-	-
rs1127220	MAF<0.05	18	55173734	LMAN1	LMAN1	g.Ex2-19A>G	p.R117R	C	T	0.02667	1	-	-
rs1144911	Monomorphism	3	10209065	IRAK2	IRAK2	g.IVS2-7988G>A		-	G	0	1	-	-
rs11465307	MAF<0.05	7	75279730	CCL24	CCL24	g.IVS2-512T>C		G	A	0.01974	1	-	-
rs11465384	Failed Validation	19	7716006	CD209	CD209	g.IVS4-28C>T		-	-	-	-	-	-
rs11466657	Monomorphism	4	38452189	TLR1/TLR10/TLR6	TLR10	g.Ex4+1480T>C	p.I473T	-	A	0	1	-	-
rs11466749	MAF<0.05	5	110440484	TSLP	TSLP	g.Ex4+942A>G		G	A	0.04	1	-	-
rs11466750	MAF<0.05	5	110440793	TSLP	TSLP	g.Ex4-831G>A		A	G	0.04054	1	-	-
rs11536897	MAF<0.05	9	119519831	TLR4	TLR4	g.*3083A>G		A	G	0.006579	1	-	-
rs11536949	Monomorphism	20	36419299	BPI/LBP	BPI/LBP	g.IVS5+2076G>T		-	G	0	1	-	-
rs11564445	Monomorphism	3	41242756	CTNNB1	CTNNB1	g.IVS6+400C>T		-	C	0	1	-	-
rs11575089	Monomorphism	6	167477189	CCR6	CCR6	g.*6355A>G		-	G	0	1	-	-
rs11575584	Monomorphism	9	34651994	IL11RA	IL11RA	g.*498A>G	p.E14E	-	G	0	1	-	-
rs11579965	MAF<0.05	1	181829784	NCF2	NCF2	g.-3696G>C		G	C	0.02632	1	-	-
rs11595876	Monomorphism	10	54196768	MBL2	MBL2	g.Ex4+1509A>G		-	T	0	1	-	-
rs11611788	Monomorphism	12	116222759	NOS1	NOS1	g.IVS3-10145A>G		-	T	0	1	-	-
rs11611878	Monomorphism	12	7032978	C1S	C1S	g.-6499T>C		-	C	0	1	-	-
rs11613834	MAF<0.05	12	7141005	C1RL	C1RL	g.IVS5-104T>C		A	G	0.02	1	-	-
rs11616333	Monomorphism	13	30204629	ALOX5AP	ALOX5AP	g.-3113G>C		-	C	0	1	-	-
rs11655833	Monomorphism	17	59436944	ICAM2	ICAM2	g.IVS1-479A>T		-	T	0	1	-	-
rs11656619	Monomorphism	17	77873180	CD7/SECTM1	CD7/SECTM1	g.Ex5+356C>T		-	G	0	1	-	-
rs11672997	Monomorphism	19	7670865	FCER2	FCER2	g.IVS1-134C>T		-	G	0	1	-	-
rs11694155	Monomorphism	2	228379667	CCL20	CCL20	g.-7204C>T		-	C	0	1	-	-
rs1169670	Monomorphism	3	10198607	IRAK2	IRAK2	g.IVS2+3903G>C		-	G	0	1	-	-
rs11717574	MAF<0.05	3	52243286	TLR9	PTK9L	g.IVS2+799A>G		C	T	0.02703	1	-	-
rs11749762	Monomorphism	5	156834193	ADAM19	ICHTHYIN	g.Ex6-112T>C		-	T	0	1	-	-
rs11763015	MAF<0.05	7	81239365	HGF	HGF	g.-2141C>A		T	G	0.02667	1	-	-
rs11869909	Failed Validation	17	5292515	C1QBP	DHX33	g.IVS11+338T>C		-	-	-	-	-	-
rs11881682	MAF<0.05	19	7721376	CD209	CD209	g.-2978T>C		A	G	0.02	1	-	-
rs11904439	Monomorphism	2	31468404	XDH	XDH	g.IVS6-3739T>C		-	A	0	1	-	-
rs11938657	Monomorphism	4	124032247	FGF2	FGF2	g.IVS2-569G>C		-	G	0	1	-	-
rs11953280	Monomorphism	5	39350504	C9	C9	g.IVS6+1130A>G		-	T	0	1	-	-
rs12043615	MAF<0.05	1	205381011	C4BPA/C4BPB	C4BPA	g.IVS9-63C>T		T	C	0.006757	1	-	-
rs12073436	Failed Validation	1	22843495	C1QA/C1QG/C1QB	C1QG	g.IVS2+211C>T		-	-	-	-	-	-
rs12084893	Monomorphism	1	167975010	SELE	SELE	g.-5632T>C		-	A	0	1	-	-
rs12088135	Monomorphism	1	205319534	PFKFB2	PFKFB2	g.Ex16+613C>T		-	C	0	1	-	-
rs12088436	MAF<0.05	1	22864431	C1QA/C1QG/C1QB	C1QB	g.*3964A>C		A	C	0.02703	1	-	-
rs12094497	MAF<0.05	1	159452927	FCER1G	FCER1G	g.IVS1+1143G>A		A	G	0.01974	1	-	-
rs12107082	Monomorphism	3	188439068	MASP1	MASP1	g.IVS11-2019C>T		-	G	0	1	-	-
rs12121318	MAF<0.05	1	159758892	FCGR2A	HSPA6	g.-2180A>G		A	G	0.01316	1	-	-
rs12153063	Monomorphism	5	40943951	C7	C7	g.-1518A>C		-	C	0	1	-	-
rs1233653	MAF<0.05	17	29663171	CCL2/CCL7/CCL11/CCL8/CCL13/CCL1	CCL2/CCL7/CCL11/CCL8/CCL13/CCL1	g.-7462T>C		C	T	0.006667	1	-	-
rs12404537	MAF<0.05	1	22841955	C1QA/C1QG/C1QB	C1QG	g.-1148C>T		T	C	0.02542	1	-	-
rs12452417	Monomorphism	17	53722201	MPO	MPO	g.-9082T>C		-	G	0	1	-	-
rs1248696	Monomorphism	10	79286611	DLG5	DLG5	g.Ex2+46A>G		-	C	0	1	-	-
rs12489890	MAF<0.05	3	188435109	MASP1	MASP1	g.Ex12-544C>T		A	G	0.02703	1	-	-
rs12685344	MAF<0.05	9	122804812	C5	C5	g.IVS20+3206C>T		A	G	0.03378	1	-	-
rs12693591	Failed Validation	2	191568747	STAT1/STAT4	STAT1	g.IVS9-557G>T		-	-	-	-	-	-
rs12740591	MAF<0.05	1	22837590	C1QA/C1QG/C1QB	C1QA	g.IVS1-323C>T		T	C	0.006757	1	-	-
rs12771266	Monomorphism	10	54191182	MBL2	MBL2	g.*6720T>C		-	G	0	1	-	-
rs12960185	Monomorphism	18	59487348	SERPINB3	SERPINB3	g.-7917T>C		-	G	0	1	-	-
rs12962017	Monomorphism	18	72844913	MBP	MBP	g.IVS5+5880T>C		-	A	0	1	-	-
rs12964019	Failed Validation	18	55170254	LMAN1	LMAN1	g.IVS5+1160A>C		-	-	-	-	-	-
rs12990918	Monomorphism	2	191661634	STAT1/STAT4	STAT4	g.IVS3-12338G>A		-	C	0	1	-	-
rs13005843	Monomorphism	2	191562971	STAT1/STAT4	STAT1	g.IVS11-326G>A		-	C	0	1	-	-
rs13010343	Monomorphism	2	191551690	STAT1/STAT4	STAT1	g.IVS21+137C>T		-	G	0	1	-	-
rs13020076	Monomorphism	2	191595288	STAT1/STAT4	STAT4	g.*7522T>C		-	A	0	1	-	-
rs13077620	Failed Validation	3	39339606	CCR8	CCR8	g.-9220A>G		-	-	-	-	-	-
rs13093535	MAF<0.05	3	169009123	SERPINI1	SERPINI1	g.IVS6+1300T>C		C	T	0.01333	1	-	-
rs13117745	MAF<0.05	4	103697738	NFKB1	NFKB1	g.IVS5-9442C>T		T	C	0.04667	1	-	-
rs13175903	Monomorphism	5	40943697	C7	C7	g.-1772G>A		-	A	0	1	-	-
rs13271014	MAF<0.05	8	71691820	TRAM1	TRAM1	g.-8831T>C		G	A	0.006579	1	-	-
rs13353878	Monomorphism	5	156893159	ADAM19	ADAM19	g.IVS4-2690C>T		-	G	0	1	-	-
rs13356677	Monomorphism	5	156922751	ADAM19	ADAM19	g.IVS3+1208C>T		-	G	0	1	-	-
rs13418515	Monomorphism	2	31466285	XDH	XDH	g.IVS6-1620G>A		-	C	0	1	-	-
rs1402745	Monomorphism	3	188473860	MASP1	MASP1	g.IVS2-10658A>T		-	T	0	1	-	-
rs1417938	MAF<0.05	1	157950810	CRP	CRP	g.IVS1+29A>T		A	T	0.04	1	-	-
rs1471962	MAF<0.05	3	45924191	CCR9	CCR9	g.*5796C>G		C	G	0.006667	1	-	-
rs1487562	MAF<0.05	10	45248828	ALOX5	ALOX5	g.IVS7+4610C>T		T	C	0.02	1	-	-
rs1547550	Failed Validation	2	191553970	STAT1/STAT4	STAT1	g.IVS18-330G>C		-	-	-	-	-	-
rs1552746	MAF<0.05	3	169013714	SERPINI1	SERPINI1	g.IVS6+5891C>T		C	T	0.03289	1	-	-
rs1553469	Monomorphism	17	38096288	CNTNAP1	CNTNAP1	g.Ex13+6C>A	p.R621R	-	C	0	1	-	-
rs16832694	MAF<0.05	1	159443430	FCER1G	NDUFS2	g.IVS4+419A>G		G	A	0.04605	1	-	-
rs16833224	Monomorphism	2	191626377	STAT1/STAT4	STAT4	g.IVS14+1084C>G		-	G	0	1	-	-
rs16841987	Monomorphism	1	157531890	FCER1A	FCER1A	g.IVS1+5723G>A		-	G	0	1	-	-
rs16851498	Monomorphism	3	169012910	SERPINI1	SERPINI1	g.IVS6+5087A>G		-	A	0	1	-	-
rs16861755	MAF<0.05	3	188429922	MASP1	MASP1	g.IVS13+320T>C		G	A	0.006757	1	-	-
rs17006215	MAF<0.05	4	123994883	FGF2	FGF2	g.IVS1-22043G>A		A	G	0.04667	1	-	-
rs17006738	MAF<0.05	1	206002726	MCP	MCP	g.IVS5+1312G>A		A	G	0.03289	1	-	-
rs1701950	Monomorphism	19	56156908	KLK6/KLK7	KLK6/KLK7	g.Ex6+41G>C	p.L162L	-	C	0	1	-	-
rs17128136	Monomorphism	14	54579863	SOCS4	SOCS4	g.Ex3+441G>A	p.P117P	-	G	0	1	-	-
rs17186575	Monomorphism	1	205351774	C4BPA/C4BPB	C4BPA	g.IVS1-1195G>A		-	G	0	1	-	-
rs17186582	Monomorphism	1	205352254	C4BPA/C4BPB	C4BPA	g.IVS1-715C>A		-	C	0	1	-	-
rs17201075	Monomorphism	5	41221364	C6	C6	g.IVS6+565C>T		-	G	0	1	-	-
rs17216487	Monomorphism	13	30219740	ALOX5AP	ALOX5AP	g.IVS2+3444G>T		-	G	0	1	-	-
rs17220750	Monomorphism	9	122827820	C5	C5	g.IVS8-141C>T		-	G	0	1	-	-
rs17245204	MAF<0.05	13	30221988	ALOX5AP	ALOX5AP	g.IVS2-2201C>T		T	C	0.04667	0.1341	-	-
rs17248462	Monomorphism	20	29419108	DEFB118/DEFB119	DEFB118/DEFB119	g.-1006A>G		-	G	0	1	-	-
rs17283264	Monomorphism	3	46228570	CCR1/CCR3	CCR1	g.-7761T>C		-	A	0	1	-	-
rs17301153	Monomorphism	1	57173572	C8A/C8B	C8B	g.IVS9-1823G>A		-	C	0	1	-	-
rs17361077	Monomorphism	7	75276699	CCL24	CCL24	g.*2350G>C		-	C	0	1	-	-
rs17375194	Monomorphism	3	188470176	MASP1	MASP1	g.IVS2-6974G>C		-	C	0	1	-	-
rs17382179	Monomorphism	8	6871147	DEFA3	DEFA3	g.-9364G>C		-	C	0	1	-	-
rs17383601	MAF<0.05	5	39319616	C9	C9	g.*1441G>C		G	C	0.02703	1	-	-
rs17384194	MAF<0.05	5	39355026	C9	C9	g.IVS5-3138G>A		T	C	0.006579	1	-	-
rs17466573	Monomorphism	8	6866247	DEFA3	DEFA3	g.-4464T>C		-	G	0	1	-	-
rs17468519	Monomorphism	5	39339216	C9	C9	g.IVS9+3260C>T		-	G	0	1	-	-
rs17470667	Monomorphism	5	39407832	C9	DAB2	g.*3045C>T		-	A	0	1	-	-
rs17473335	Monomorphism	4	124000868	FGF2	FGF2	g.IVS1-16058T>G		-	T	0	1	-	-
rs17500235	Monomorphism	17	37609886	STAT5B	STAT5B	g.IVS16-1534A>C		-	T	0	1	-	-
rs17501108	MAF<0.05	7	81241830	HGF	HGF	g.-4606C>A		T	G	0.01333	1	-	-
rs17523783	Monomorphism	1	167868865	SELP	SELP	g.-2928C>A		-	G	0	1	-	-
rs17591972	Failed Validation	17	37652970	STAT5B	STAT5B	g.IVS1-15289T>C		-	-	-	-	-	-
rs17593222	MAF<0.05	17	37766516	STAT3/STAT5A	STAT3/STAT5A	g.IVS1-12433G>C		G	C	0.03947	1	-	-
rs17601035	Monomorphism	5	156872063	ADAM19	ADAM19	g.IVS8+957G>C		-	C	0	1	-	-
rs17664818	MAF<0.05	10	54204706	MBL2	MBL2	g.-3304T>G		A	C	0.01333	1	-	-
rs17686100	Monomorphism	8	71669566	TRAM1	TRAM1	g.IVS5-187A>G		-	T	0	1	-	-
rs17714101	Monomorphism	3	45914806	CCR9	CCR9	g.IVS2-2500G>A		-	G	0	1	-	-
rs17722851	Failed Validation	17	23134963	NOS2A	NOS2A	g.IVS5-704A>T		-	-	-	-	-	-
rs17749316	Monomorphism	2	191548954	STAT1/STAT4	STAT1	g.IVS22-96G>C		-	C	0	1	-	-
rs17764723	Failed Validation	17	4478631	ALOX15	ALOX15	g.*3012A>G		-	-	-	-	-	-
rs17765088	Monomorphism	3	45918599	CCR9	CCR9	g.Ex3-1073C>G		-	C	0	1	-	-
rs17769459	Monomorphism	2	191701793	STAT1/STAT4	STAT4	g.IVS3+17791G>A		-	C	0	1	-	-
rs17826057	MAF<0.05	12	64919431	IRAK3	IRAK3	g.IVS8-5102G>A		A	G	0.03947	1	-	-
rs1799969	Monomorphism	19	10255792	ICAM1/ICAM4/ICAM5	ICAM1/ICAM4/ICAM5	g.Ex4+84G>A	p.G241R	-	G	0	1	-	-
rs1800805	Failed Validation	1	167867905	SELP	SELP	g.-1968A>G		-	-	-	-	-	-
rs1862405	Monomorphism	5	156918457	ADAM19	ADAM19	g.IVS3+5502T>A		-	A	0	1	-	-
rs1883112	Failed Validation	22	35586792	NCF4	NCF4	g.-367A>G		-	-	-	-	-	-
rs1884429	Failed Validation	1	11035423	MASP2	SRM	g.*2085A>G		-	-	-	-	-	-
rs1916661	MAF<0.05	18	59726100	SERPINB2	SERPINB2	g.*4580G>T		T	G	0.03289	1	-	-
rs1927906	MAF<0.05	9	119519936	TLR4	TLR4	g.*3188T>C		C	T	0.03947	1	-	-
rs193779	Monomorphism	16	11258466	SOCS1	SOCS1	g.-1629T>C		-	G	0	1	-	-
rs1952438	MAF<0.05	14	54567698	SOCS4	SOCS4	g.IVS1-633G>A		A	G	0.04667	1	-	-
rs1960669	MAF<0.05	4	124002018	FGF2	FGF2	g.IVS1-14908C>A		A	C	0.01316	1	-	-
rs198972	Failed Validation	19	56071705	KLK2	KLK2	g.Ex3-122C>T	p.L124L	-	-	-	-	-	-
rs198979	Monomorphism	19	56075992	KLK2	KLK2	g.*2364C>T		-	T	0	1	-	-
rs2015070	MAF<0.05	17	31415896	CCL18	CCL18	g.IVS1+14C>T		T	C	0.03333	1	-	-
rs202445	Monomorphism	21	31947538	SOD1	SOD1	g.-6415T>C		-	T	0	1	-	-
rs2066808	MAF<0.05	12	55024240	STAT2	STAT2	g.IVS22-54T>C		G	A	0.02027	1	-	-
rs2066843	Monomorphism	16	49302700	CARD15	CARD15	g.Ex4+731C>T	p.R459R	-	C	0	1	-	-
rs2071174	Failed Validation	11	1063712	MUC6	MUC6	g.-36999G>A		-	-	-	-	-	-
rs2071175	Failed Validation	11	1064401	MUC6	MUC6	g.-37688G>A		-	-	-	-	-	-
rs2072685	MAF<0.05	17	7890159	ALOX12B/ALOX15B	ALOX15B	g.IVS8+430G>A		A	G	0.007042	1	-	-
rs207444	Monomorphism	2	31417301	XDH	XDH	g.IVS33+398T>C		-	G	0	1	-	-
rs2110586	Monomorphism	19	17818309	JAK3	JAK3	g.IVS1+1446A>G		-	C	0	1	-	-
rs2209627	Monomorphism	1	100971735	VCAM1	VCAM1	g.IVS7+907A>G		-	A	0	1	-	-
rs2227714	Monomorphism	7	100568629	SERPINE1	SERPINE1	g.Ex9-398C>T		-	C	0	1	-	-
rs2228428	MAF<0.05	3	32970932	CCR4	CCR4	g.Ex2-476C>T	p.Y338Y	T	C	0.02	1	-	-
rs2230399	Monomorphism	19	10305603	ICAM3	ICAM3	g.Ex7+133G>C	p.S525T	-	C	0	1	-	-
rs2232618	MAF<0.05	20	36435175	BPI/LBP	BPI/LBP	g.Ex13-19T>C	p.F436L	C	T	0.006667	1	-	-
rs2241831	Failed Validation	10	79226035	DLG5	DLG5	g.IVS27-83C>A		-	-	-	-	-	-
rs224215	MAF<0.05	16	3241361	MEFV	MEFV	g.IVS2-1580T>C		G	A	0.006757	1	-	-
rs2251746	MAF<0.05	1	157538684	FCER1A	FCER1A	g.IVS1-36T>C		C	T	0.03289	1	-	-
rs2282582	MAF<0.05	18	55180141	LMAN1	LMAN1	g.-2684T>A		A	T	0.02667	1	-	-
rs2282583	MAF<0.05	18	55180686	LMAN1	LMAN1	g.-3229G>A		T	C	0.03289	1	-	-
rs2295957	MAF<0.05	1	172136266	SERPINC1	SERPINC1	g.*3383A>G		T	C	0.04667	1	-	-
rs2298712	Failed Validation	18	55151283	LMAN1	LMAN1	g.IVS11+20C>T		-	-	-	-	-	-
rs2302600	Failed Validation	19	17802143	JAK3	JAK3	g.IVS22-116T>G		-	-	-	-	-	-
rs2303112	Failed Validation	19	7672866	FCER2	FCER2	g.IVS1+39A>G		-	-	-	-	-	-
rs2335534	MAF<0.05	19	54706789	FCGRT	FCGRT	g.-1680A>G		A	G	0.04	1	-	-
rs237554	MAF<0.05	19	6637659	C3	C3	g.IVS28+98A>G		T	C	0.01333	1	-	-
rs2384045	Failed Validation	10	54205868	MBL2	MBL2	g.-4466C>T		-	-	-	-	-	-
rs2420378	MAF<0.05	1	167836542	SELP	SELP	g.IVS10+2346T>A		A	T	0.02632	1	-	-
rs2425358	Monomorphism	20	36394498	BPI/LBP	BPI/LBP	g.IVS12+1592A>G		-	A	0	1	-	-
rs2427829	MAF<0.05	1	157548635	FCER1A	OR10J3	g.*1448T>C		A	G	0.02027	1	-	-
rs2446625	Failed Validation	1	159750672	FCGR2A	FCGR2A	g.IVS6+326G>A		-	-	-	-	-	-
rs2459611	Monomorphism	2	191647432	STAT1/STAT4	STAT4	g.IVS4-1271G>A		-	T	0	1	-	-
rs2536512	Failed Validation	4	24410413	SOD3	SOD3	g.Ex3+188G>A	p.A58T	-	-	-	-	-	-
rs2642196	Failed Validation	19	6668934	C3	C3	g.IVS4+171A>G		-	-	-	-	-	-
rs266115	Failed Validation	19	56025050	KLK1/KLK15	KLK1/KLK15	g.IVS1+1468T>C		-	-	-	-	-	-
rs2664593	Failed Validation	17	4491881	ALOX15	ALOX15	g.-185C>G		-	-	-	-	-	-
rs266851	Failed Validation	19	56028151	KLK1/KLK15	KLK1/KLK15	g.-1590G>A		-	-	-	-	-	-
rs268600	Monomorphism	8	71680925	TRAM1	TRAM1	g.IVS1+1941C>T		-	A	0	1	-	-
rs2734299	Failed Validation	17	23159085	NOS2A	NOS2A	g.-9122C>T		-	-	-	-	-	-
rs2738173	Monomorphism	8	6728348	DEFB1	DEFB1	g.-5558C>T		-	A	0	1	-	-
rs2772547	Failed Validation	9	34658878	IL11RA	IL11RA	g.*7382G>T		-	-	-	-	-	-
rs2796269	Failed Validation	1	206003509	MCP	MCP	g.IVS5+2095C>T		-	-	-	-	-	-
rs2838732	Monomorphism	21	45147373	ITGB2	ITGB2	g.IVS5+335G>A		-	C	0	1	-	-
rs2853699	Monomorphism	3	39348906	CCR8	CCR8	g.Ex2+94C>G	p.A27G	-	C	0	1	-	-
rs2854386	MAF<0.05	2	218735747	IL8RA/IL8RB	IL8RA	g.*1379G>C		G	C	0.0473	1	-	-
rs2946863	MAF<0.05	19	54704857	FCGRT	FCGRT	g.-3612G>C		C	G	0.03947	1	-	-
rs2970503	Monomorphism	7	30479734	CARD4	CARD4	g.IVS1+5013C>T		-	G	0	1	-	-
rs2977814	Failed Validation	8	6820793	DEFA1	DEFA1	g.*1908C>T		-	-	-	-	-	-
rs2978880	Failed Validation	8	6711716	DEFB1	DEFB1	g.*3896T>C		-	-	-	-	-	-
rs3024921	Monomorphism	2	191651517	STAT1/STAT4	STAT4	g.IVS3-2221T>A		-	A	0	1	-	-
rs3024935	Failed Validation	2	191604299	STAT1/STAT4	STAT4	g.IVS22+122C>A		-	-	-	-	-	-
rs3024936	Failed Validation	2	191603621	STAT1/STAT4	STAT4	g.IVS23+322C>G		-	-	-	-	-	-
rs3024957	Monomorphism	12	55784302	STAT6	STAT6	g.IVS11+212G>C		-	C	0	1	-	-
rs3024971	MAF<0.05	12	55779994	STAT6	STAT6	g.IVS14-41A>C		G	T	0.03947	1	-	-
rs3024979	Monomorphism	12	55774560	STAT6	NAB2	g.IVS6-102A>T		-	A	0	1	-	-
rs3027292	Failed Validation	17	7928443	ALOX12B/ALOX15B	ALOX12B	g.IVS2+1616A>G		-	-	-	-	-	-
rs3027297	Failed Validation	17	7929527	ALOX12B/ALOX15B	ALOX12B	g.IVS2+532C>T		-	-	-	-	-	-
rs308382	MAF<0.05	4	124002644	FGF2	FGF2	g.IVS1-14282T>C		C	T	0.02703	1	-	-
rs308434	Monomorphism	4	123991278	FGF2	FGF2	g.IVS1+23321C>T		-	C	0	1	-	-
rs308439	MAF<0.05	4	123993029	FGF2	FGF2	g.IVS1-23897T>G		G	T	0.006667	1	-	-
rs308443	MAF<0.05	4	123995217	FGF2	FGF2	g.IVS1-21709G>A		A	G	0.006757	1	-	-
rs3087505	MAF<0.05	4	187416480	KLKB1	KLKB1	g.Ex15-139A>G		A	G	0.04605	1	-	-
rs3091237	Monomorphism	17	29621916	CCL2/CCL7/CCL11/CCL8/CCL13/CCL1	CCL2/CCL7/CCL11/CCL8/CCL13/CCL1	g.IVS1-362C>T		-	C	0	1	-	-
rs3091309	Monomorphism	3	46278188	CCR1/CCR3	CCR3	g.IVS1-572A>G		-	G	0	1	-	-
rs3091327	Monomorphism	17	29625355	CCL2/CCL7/CCL11/CCL8/CCL13/CCL1	CCL2/CCL7/CCL11/CCL8/CCL13/CCL1	g.*2420A>G		-	A	0	1	-	-
rs3093006	Monomorphism	6	167471442	CCR6	CCR6	g.Ex3-1178G>A		-	G	0	1	-	-
rs3093007	MAF<0.05	6	167469765	CCR6	CCR6	g.Ex3+48T>C	p.F19F	C	T	0.03289	1	-	-
rs3107217	MAF<0.05	3	188479513	MASP1	MASP1	g.IVS2+6794A>T		A	T	0.006667	1	-	-
rs3130683	MAF<0.05	6	31996346	C2	C2	g.-7162T>C		C	T	0.006757	1	-	-
rs3138039	Monomorphism	17	29676863	CCL2/CCL7/CCL11/CCL8/CCL13/CCL1	CCL2/CCL7/CCL11/CCL8/CCL13/CCL1	g.*4823C>T		-	T	0	1	-	-
rs3138119	Monomorphism	2	228390913	CCL20	CCL20	g.*869A>G		-	G	0	1	-	-
rs3176829	HWE p<0.0001	17	77868542	CD7/SECTM1	CD7/SECTM1	g.IVS1+37A>G		C	T	0.5	4.034e-08	-	-
rs3176869	MAF<0.05	1	100969021	VCAM1	VCAM1	g.IVS5-321A>T		T	A	0.03333	1	-	-
rs3212752	MAF<0.05	19	17809732	JAK3	JAK3	g.IVS12+9A>G		C	T	0.04054	1	-	-
rs324056	Failed Validation	5	40968997	C7	C7	g.IVS3-1187C>A		-	-	-	-	-	-
rs324058	MAF<0.05	5	40997651	C7	C7	g.IVS12-293C>A		C	A	0.03947	1	-	-
rs348389	Failed Validation	19	6486637	TNFSF9	TNFSF9	g.Ex3-297C>T		-	-	-	-	-	-
rs3557	MAF<0.05	1	159455517	FCER1G	FCER1G	g.Ex5-146T>G		G	T	0.006757	1	-	-
rs3736112	MAF<0.05	16	87249513	CYBA	MVD	g.IVS6+52G>A		T	C	0.04237	1	-	-
rs3746731	Failed Validation	20	23013209	C1QR1	C1QR1	g.Ex1-314C>T	p.P541S	-	-	-	-	-	-
rs3750920	Failed Validation	11	1266532	TOLLIP	TOLLIP	g.Ex4+51G>A	p.P139P	-	-	-	-	-	-
rs3760724	Failed Validation	19	56065859	KLK2	KLK2	g.-2682A>G		-	-	-	-	-	-
rs3761049	Failed Validation	19	17796253	JAK3	JAK3	g.*2298C>T		-	-	-	-	-	-
rs3774268	Failed Validation	3	188437018	MASP1	MASP1	g.Ex12+32C>T	p.S445S	-	-	-	-	-	-
rs3774641	Failed Validation	3	45912837	CCR9	CCR9	g.IVS2+1387G>T		-	-	-	-	-	-
rs3782212	Failed Validation	12	116239785	NOS1	NOS1	g.IVS2-6005G>A		-	-	-	-	-	-
rs3782218	MAF<0.05	12	116255894	NOS1	NOS1	g.IVS1-2217G>A		T	C	0.03378	1	-	-
rs3782347	MAF<0.05	12	64918183	IRAK3	IRAK3	g.IVS8-6350A>G		G	A	0.03333	1	-	-
rs3788151	MAF<0.05	21	45161993	ITGB2	ITGB2	g.IVS1+3171G>A		T	C	0.03289	1	-	-
rs3792297	MAF<0.05	3	169013284	SERPINI1	SERPINI1	g.IVS6+5461G>C		G	C	0.02632	1	-	-
rs3794848	Failed Validation	18	72838349	MBP	MBP	g.IVS5-7345C>A		-	-	-	-	-	-
rs3804617	MAF<0.05	3	169010065	SERPINI1	SERPINI1	g.IVS6+2242T>C		C	T	0.04667	0.0005788	-	-
rs3822055	MAF<0.05	4	187416672	KLKB1	KLKB1	g.*311C>T		T	C	0.04605	1	-	-
rs38402	Monomorphism	7	30493888	CARD4	C7orf24	g.*9344G>A		-	T	0	1	-	-
rs3844280	Monomorphism	3	10187258	IRAK2	IRAK2	g.IVS1+5526C>T		-	C	0	1	-	-
rs3853683	Monomorphism	18	59482212	SERPINB3	SERPINB3	g.-2781A>G		-	C	0	1	-	-
rs3889277	MAF<0.05	11	61935397	SCGB1A1	SCGB1A1	g.-7746G>C		C	G	0.006667	1	-	-
rs3917438	Monomorphism	1	167960474	SELE	SELE	g.IVS13-200C>T		-	G	0	1	-	-
rs3917461	Monomorphism	1	167962115	SELE	SELE	g.IVS11+349A>T		-	T	0	1	-	-
rs3917715	Monomorphism	1	167849934	SELP	SELP	g.IVS3-379A>G		-	T	0	1	-	-
rs3917727	MAF<0.05	1	167847882	SELP	SELP	g.IVS6+197T>C		G	A	0.006667	1	-	-
rs3917744	MAF<0.05	1	167844614	SELP	SELP	g.IVS8+752T>C		A	G	0.01974	1	-	-
rs3917802	MAF<0.05	1	167833708	SELP	SELP	g.IVS10-670A>G		C	T	0.006757	1	-	-
rs3917818	MAF<0.05	1	167831542	SELP	SELP	g.IVS12+245C>T		A	G	0.006667	1	-	-
rs3917820	Monomorphism	1	167831369	SELP	SELP	g.IVS12+418C>T		-	G	0	1	-	-
rs3917848	MAF<0.05	1	167826415	SELP	SELP	g.IVS15-351T>G		C	A	0.008475	1	-	-
rs3917862	Monomorphism	1	167859737	SELP	SELP	g.IVS1-4656T>C		-	A	0	1	-	-
rs3918227	MAF<0.05	7	150331879	NOS3	NOS3	g.IVS14+1554C>A		A	C	0.03947	1	-	-
rs4077757	MAF<0.05	11	1095834	MUC6	MUC6	g.-69121T>A		A	T	0.01974	1	-	-
rs423490	Failed Validation	19	6648406	C3	C3	g.Ex21-52T>C	p.A915A	-	-	-	-	-	-
rs4251520	Monomorphism	12	42461605	IRAK4	IRAK4	g.IVS8-772T>C		-	T	0	1	-	-
rs4253243	Monomorphism	4	187390505	KLKB1	KLKB1	g.IVS3+68T>C		-	T	0	1	-	-
rs4253246	MAF<0.05	4	187391418	KLKB1	KLKB1	g.IVS3-682A>T		T	A	0.04667	1	-	-
rs4279521	Failed Validation	7	75290520	CCL24	CCL24	g.-9550T>G		-	-	-	-	-	-
rs4284061	Failed Validation	8	6865667	DEFA3	DEFA3	g.-3884T>A		-	-	-	-	-	-
rs4452007	MAF<0.05	17	77876359	CD7/SECTM1	CD7/SECTM1	g.IVS2-304A>G		C	T	0.006667	1	-	-
rs4462945	Monomorphism	3	10246265	IRAK2	IRAK2	g.IVS10+3148C>T		-	C	0	1	-	-
rs4512398	Failed Validation	8	6868004	DEFA3	DEFA3	g.-6221G>A		-	-	-	-	-	-
rs4607021	Failed Validation	21	45146915	ITGB2	ITGB2	g.IVS5+793C>T		-	-	-	-	-	-
rs4648022	Monomorphism	4	103715475	NFKB1	NFKB1	g.IVS6-1596C>T		-	C	0	1	-	-
rs4648090	Monomorphism	4	103746106	NFKB1	NFKB1	g.IVS16-585G>A		-	G	0	1	-	-
rs4648110	MAF<0.05	4	103752867	NFKB1	NFKB1	g.IVS22+58T>A		A	T	0.0473	1	-	-
rs4652813	Failed Validation	1	181801167	NCF2	NCF2	g.IVS10+295G>C		-	-	-	-	-	-
rs4655914	Monomorphism	1	86737397	CLCA1/CLCA2	CLCA1	g.IVS14+315G>T		-	G	0	1	-	-
rs4671871	MAF<0.05	2	68139145	C1D	C1D	g.IVS1+4436C>T		A	G	0.01351	1	-	-
rs4696483	Monomorphism	4	154838705	TLR2	TLR2	g.IVS2-4789T>C		-	C	0	1	-	-
rs470261	Monomorphism	18	72851768	MBP	MBP	g.IVS4-898T>C		-	A	0	1	-	-
rs470330	Monomorphism	18	72849945	MBP	MBP	g.IVS5+848C>T		-	G	0	1	-	-
rs4704870	Monomorphism	5	156832447	ADAM19	ICHTHYIN	g.Ex6+530T>C	p.V434V	-	C	0	1	-	-
rs470793	Monomorphism	18	72845071	MBP	MBP	g.IVS5+5722A>G		-	T	0	1	-	-
rs470895	MAF<0.05	18	72844509	MBP	MBP	g.IVS5+6284T>C		G	A	0.02	1	-	-
rs4769871	MAF<0.05	13	30210508	ALOX5AP	ALOX5AP	g.IVS1+2696C>T		T	C	0.01333	1	-	-
rs4795050	Failed Validation	17	23103032	NOS2A	NOS2A	g.*5366T>C		-	-	-	-	-	-
rs4795895	MAF<0.05	17	29635559	CCL2/CCL7/CCL11/CCL8/CCL13/CCL1	CCL2/CCL7/CCL11/CCL8/CCL13/CCL1	g.-1381A>G		A	G	0.04667	1	-	-
rs4804801	Failed Validation	19	7713482	CD209	CD209	g.Ex7+645A>T		-	-	-	-	-	-
rs4833103	Monomorphism	4	38491897	TLR1/TLR10/TLR6	TLR1	g.-15049T>G		-	C	0	1	-	-
rs4844390	Monomorphism	1	206001472	MCP	MCP	g.IVS5+58A>G		-	A	0	1	-	-
rs4879816	MAF<0.05	9	34660128	IL11RA	IL11RA	g.*8632A>C		A	C	0.03333	1	-	-
rs4898758	MAF<0.05	14	51806518	PTGDR	PTGDR	g.IVS1+1390A>G		G	A	0.04605	1	-	-
rs4914	MAF<0.05	5	139991652	CD14	CD14	g.Ex2-148G>C	p.L367L	G	C	0.006667	1	-	-
rs497309	Monomorphism	6	32000463	C2	C2	g.-3045C>A		-	A	0	1	-	-
rs5030390	Monomorphism	19	10243537	ICAM1/ICAM4/ICAM5	ICAM1/ICAM4/ICAM5	g.IVS1+635G>A		-	G	0	1	-	-
rs5030728	Monomorphism	9	119514103	TLR4	TLR4	g.IVS3-385G>A		-	G	0	1	-	-
rs530880	MAF<0.05	11	60388717	GPR44	ZP1	g.-2893T>C		T	C	0.03333	1	-	-
rs5743289	Monomorphism	16	49314275	CARD15	CARD15	g.IVS8+158C>T		-	C	0	1	-	-
rs5743291	Monomorphism	16	49314777	CARD15	CARD15	g.Ex9-20G>A	p.V955I	-	G	0	1	-	-
rs5743507	Monomorphism	20	36372466	BPI/LBP	BPI/LBP	g.Ex4-3G>C	p.V182V	-	G	0	1	-	-
rs5743539	MAF<0.05	20	36392996	BPI/LBP	BPI/LBP	g.IVS12+90G>A		A	G	0.006667	1	-	-
rs5743611	Monomorphism	4	38476609	TLR1/TLR10/TLR6	TLR1	g.Ex4+306G>C	p.R80T	-	C	0	1	-	-
rs5743704	Failed Validation	4	154845401	TLR2	TLR2	g.Ex3-1293C>A	p.P631H	-	-	-	-	-	-
rs5743810	Failed Validation	4	38506745	TLR1/TLR10/TLR6	TLR6	g.Ex1+811T>C	p.S249P	-	-	-	-	-	-
rs5743927	Failed Validation	11	1276092	TOLLIP	TOLLIP	g.IVS1-2492G>C		-	-	-	-	-	-
rs5743942	Failed Validation	11	1270604	TOLLIP	TOLLIP	g.IVS2-2389T>C		-	-	-	-	-	-
rs5744297	Monomorphism	1	86705521	CLCA1/CLCA2	CLCA1	g.-1721C>G		-	C	0	1	-	-
rs5744355	Monomorphism	1	86721461	CLCA1/CLCA2	CLCA1	g.IVS6+808C>G		-	C	0	1	-	-
rs5744463	Monomorphism	5	66528168	CD180	CD180	g.Ex1-33G>C	p.V20L	-	C	0	1	-	-
rs5744478	MAF<0.05	5	66525321	CD180	CD180	g.IVS1+2815T>C		G	A	0.006757	1	-	-
rs5744519	Monomorphism	5	66517331	CD180	CD180	g.IVS2+104C>G		-	G	0	1	-	-
rs5745608	Monomorphism	7	81237441	HGF	HGF	g.-217A>C		-	T	0	1	-	-
rs5745627	Monomorphism	7	81230474	HGF	HGF	g.IVS1-350G>C		-	C	0	1	-	-
rs5745660	Monomorphism	7	81213023	HGF	HGF	g.IVS5-651A>T		-	T	0	1	-	-
rs5745687	Monomorphism	7	81196987	HGF	HGF	g.Ex9+45G>A	p.E304K	-	C	0	1	-	-
rs5746151	Monomorphism	6	160021310	SOD2	SOD2	g.IVS5-990G>A		-	C	0	1	-	-
rs594661	Monomorphism	1	57174570	C8A/C8B	C8B	g.IVS9-2821A>G		-	C	0	1	-	-
rs6057657	Monomorphism	20	29427491	DEFB118/DEFB119	DEFB118/DEFB119	g.*1218T>C		-	A	0	1	-	-
rs6105	MAF<0.05	18	59716042	SERPINB2	SERPINB2	g.Ex5-17C>G	p.V173V	G	C	0.04605	1	-	-
rs6106598	MAF<0.05	20	23021904	C1QR1	C1QR1	g.-7074G>A		T	C	0.01316	1	-	-
rs6119276	Monomorphism	20	29415197	DEFB118/DEFB119	DEFB118/DEFB119	g.-4917C>T		-	T	0	1	-	-
rs6136	Monomorphism	1	167830575	SELP	SELP	g.Ex13-22A>C	p.T756P	-	T	0	1	-	-
rs6427596	Failed Validation	1	159750799	FCGR2A	FCGR2A	g.IVS6+453G>T		-	-	-	-	-	-
rs6427598	Failed Validation	1	159751188	FCGR2A	FCGR2A	g.IVS6+842T>A		-	-	-	-	-	-
rs6463554	MAF<0.05	7	6404326	RAC1	RAC1	g.IVS4-492G>C		C	G	0.006757	1	-	-
rs6699859	Monomorphism	1	57133038	C8A/C8B	C8A	g.IVS7+8610T>C		-	C	0	1	-	-
rs6761387	MAF<0.05	2	218704798	IL8RA/IL8RB	IL8RB	g.IVS2+2465C>T		T	C	0.01316	1	-	-
rs6771578	MAF<0.05	3	168931240	SERPINI1	PDCD10	g.IVS2+3456A>G		C	T	0.04667	1	-	-
rs6785838	MAF<0.05	3	169015594	SERPINI1	SERPINI1	g.IVS6+7771C>G		G	C	0.02	1	-	-
rs6796045	MAF<0.05	3	38164164	MYD88	MYD88	g.*6382A>T		T	A	0.03289	0.01333	-	-
rs6915410	MAF<0.05	6	35400182	DEF6	DEF6	g.*3016C>T		C	T	0.0473	0.04225	-	-
rs6942478	MAF<0.05	7	81240410	HGF	HGF	g.-3186T>C		A	G	0.02	1	-	-
rs6988319	Failed Validation	8	6903083	DEFA5	DEFA5	g.-1453G>C		-	-	-	-	-	-
rs708035	Monomorphism	3	10251163	IRAK2	IRAK2	g.Ex11+21T>A	p.D431E	-	A	0	1	-	-
rs712276	MAF<0.05	8	6769681	DEFA4/DEFA6	DEFA6	g.Ex2-53T>C		G	A	0.03425	1	-	-
rs7126405	MAF<0.05	11	1093296	MUC6	MUC6	g.-66583A>G		C	T	0.03289	1	-	-
rs720958	MAF<0.05	3	169023255	SERPINI1	SERPINI1	g.IVS6-213A>G		G	A	0.04	1	-	-
rs7238776	Monomorphism	18	55143487	LMAN1	LMAN1	g.*5817T>C		-	A	0	1	-	-
rs7245564	MAF<0.05	19	17824878	JAK3	JAK3	g.-8651C>A		G	T	0.03378	1	-	-
rs7246794	Monomorphism	19	56109770	KLK4	KLK4	g.-3963G>A		-	C	0	1	-	-
rs7255931	Failed Validation	19	17799844	JAK3	JAK3	g.IVS23-1125G>C		-	-	-	-	-	-
rs7288979	Monomorphism	22	35979440	RAC2	RAC2	g.-9305G>A		-	T	0	1	-	-
rs729925	MAF<0.05	6	35364912	DEF6	ZNF76	g.IVS5-1109C>A		C	A	0.006579	1	-	-
rs737091	MAF<0.05	20	36443337	BPI/LBP	BPI/LBP	g.*4611C>T		T	C	0.02027	1	-	-
rs743646	MAF<0.05	17	4482990	ALOX15	ALOX15	g.Ex11+37A>G	p.T485T	C	T	0.006667	1	-	-
rs7480563	Monomorphism	11	1091649	MUC6	MUC6	g.-64936A>G		-	C	0	1	-	-
rs7492	MAF<0.05	20	23008257	C1QR1	C1QR1	g.Ex2-263T>C		A	G	0.04605	1	-	-
rs7529425	Monomorphism	1	159746223	FCGR2A	FCGR2A	g.IVS3-11G>A		-	G	0	1	-	-
rs7537126	MAF<0.05	1	171287972	TNFSF18	TNFSF18	g.-1312G>A		C	T	0.01333	1	-	-
rs7582426	MAF<0.05	2	68120695	C1D	C1D	g.*2829T>C		G	A	0.04667	1	-	-
rs7596818	Failed Validation	2	191717555	STAT1/STAT4	STAT4	g.IVS3+2029C>T		-	-	-	-	-	-
rs7599504	Monomorphism	2	191684464	STAT1/STAT4	STAT4	g.IVS3+35120A>G		-	T	0	1	-	-
rs760694	MAF<0.05	1	167835322	SELP	SELP	g.IVS10-2284A>C		T	G	0.02667	1	-	-
rs7617872	Monomorphism	3	46214477	CCR1/CCR3	CCR1	g.*5263T>C		-	A	0	1	-	-
rs7625290	Failed Validation	3	38153294	MYD88	ACAA1	g.IVS1+66A>C		-	-	-	-	-	-
rs7641394	MAF<0.05	3	169014301	SERPINI1	SERPINI1	g.IVS6+6478T>C		C	T	0.03947	1	-	-
rs7651327	MAF<0.05	3	169017687	SERPINI1	SERPINI1	g.IVS6-5781T>C		C	T	0.04	1	-	-
rs7660429	Monomorphism	4	38458876	TLR1/TLR10/TLR6	TLR10	g.IVS1+2061G>C		-	C	0	1	-	-
rs7694627	MAF<0.05	4	124007945	FGF2	FGF2	g.IVS1-8981T>C		C	T	0.01333	1	-	-
rs7867729	Monomorphism	9	122763231	C5	C5	g.IVS37+350C>T		-	G	0	1	-	-
rs789185	Failed Validation	1	181820904	NCF2	NCF2	g.IVS2+1749T>C		-	-	-	-	-	-
rs7934606	Monomorphism	11	1083945	MUC6	MUC6	g.-57232A>G		-	C	0	1	-	-
rs7944723	Monomorphism	11	1083710	MUC6	MUC6	g.-56997C>G		-	G	0	1	-	-
rs7965055	Monomorphism	12	7041881	C1S	C1S	g.Ex5+50C>T	p.C147C	-	C	0	1	-	-
rs803014	MAF<0.05	14	51799880	PTGDR	PTGDR	g.-4402G>A		A	G	0.04605	1	-	-
rs803022	Monomorphism	14	51795384	PTGDR	PTGDR	g.-8898A>T		-	T	0	1	-	-
rs8105483	MAF<0.05	19	7715283	CD209	CD209	g.IVS5-178G>C		G	C	0.02	1	-	-
rs8137602	Monomorphism	22	35604595	NCF4	NCF4	g.*783C>G		-	C	0	1	-	-
rs835209	Monomorphism	5	39386120	C9	C9	g.IVS1-8065G>A		-	C	0	1	-	-
rs854462	MAF<0.05	17	31410203	CCL18	CCL18	g.-5612G>A		G	A	0.03333	1	-	-
rs867174	MAF<0.05	19	17813930	JAK3	JAK3	g.IVS6+195T>C		G	A	0.02113	1	-	-
rs867811	Failed Validation	9	34653798	IL11RA	IL11RA	g.*2302C>T		-	-	-	-	-	-
rs874603	Monomorphism	3	188435731	MASP1	MASP1	g.Ex12-1166C>T		-	A	0	1	-	-
rs876650	Monomorphism	3	188434334	MASP1	MASP1	g.IVS12+232C>G		-	G	0	1	-	-
rs884113	Monomorphism	9	138961333	C8G	C8G	g.*278G>A		-	G	0	1	-	-
rs8854	MAF<0.05	16	87246366	CYBA	MVD	g.Ex10+149G>A		T	C	0.006944	1	-	-
rs9200	Failed Validation	5	41178363	C6	C6	g.Ex18-271G>A		-	-	-	-	-	-
rs9267677	MAF<0.05	6	32000620	C2	C2	g.-2888T>C		C	T	0.04667	1	-	-
rs9315051	MAF<0.05	13	30234177	ALOX5AP	ALOX5AP	g.IVS4-1904A>G		G	A	0.01333	1	-	-
rs932169	Monomorphism	2	191637523	STAT1/STAT4	STAT4	g.IVS8+255C>G		-	G	0	1	-	-
rs9332739	MAF<0.05	6	32011783	C2	C2	g.Ex7-35G>C	p.E318D	C	G	0.02703	1	-	-
rs9355616	Failed Validation	6	167477512	CCR6	CCR6	g.*6678C>T		-	-	-	-	-	-
rs9578196	MAF<0.05	13	30209557	ALOX5AP	ALOX5AP	g.IVS1+1745C>T		T	C	0.04605	1	-	-
rs9661996	MAF<0.05	1	57173698	C8A/C8B	C8B	g.IVS9-1949G>T		A	C	0.03947	1	-	-
rs975074	MAF<0.05	1	171280390	TNFSF18	TNFSF18	g.IVS1-658G>T		C	A	0.04795	1	-	-
rs9856551	MAF<0.05	3	168963358	SERPINI1	SERPINI1	g.IVS1-26235A>G		G	A	0.04667	1	-	-
rs9881120	MAF<0.05	3	38161421	MYD88	MYD88	g.*3639A>T		T	A	0.01974	1	-	-

## Sheet: NHL
DBSNPID	STATUS	CHR	CHR_POS	TARGET_GENE_REGION	GENE	GENOMIC_SYSTEMATIC	PROTEIN_SYSTEMATIC	Allele1	Allele2	MAF	HWE P	Global P	Permutated P
rs10421916	Analyzed, Replication	19	17789987	JAK3	INSL3	g.IVS1-1119T>C		A	G	0.2952	0.747	0.0008567	0.0005999
rs11196422	Analyzed, Replication	10	115433080	CASP7	CASP7	g.IVS2+3353G>A		A	G	0.2048	0.45	0.00558	0.0029
rs11086080	Analyzed, Replication	19	17788041	JAK3	INSL3	g.*621G>A		T	C	0.3554	0.3533	0.004077	0.0037
rs2230804	Analyzed, Replication	10	101967873	CHUK	CHUK	g.Ex9+5G>A	p.V268I	T	C	0.488	1	0.005128	0.0044
rs7463256	Analyzed, Replication	8	23157565	TNFRSF10B/TNFRSF10C/TNFRSF10D/TNFRSF10A	CHMP7	g.IVS1+263T>C		C	T	0.4819	1	0.00322	0.0045
rs17772583	Analyzed, Replication	5	131981409	RAD50	RAD50	g.IVS20-252A>G		G	A	0.4639	0.1757	0.01236	0.0047
rs755398	Analyzed, Replication	1	12124682	TNFRSF8/TNFRSF1B	TNFRSF8	g.IVS14-249G>C		C	G	0.3072	0.6633	0.005836	0.0049
rs2003549	Analyzed, Replication	17	59362169	CD79B	CD79B	g.IVS2+258G>A		T	C	0.07407	1	0.003119	0.005199
rs11862306	Analyzed, Replication	16	3001929	TNFRSF12A	CLDN9	g.-1435C>T		T	C	0.4699	1	0.007972	0.006799
rs686952	Analyzed, Replication	2	111635817	BCL2L11	BCL2L11	g.IVS6-2364A>C		A	C	0.1145	1	0.008637	0.006999
rs641941	Analyzed, Replication	1	12129239	TNFRSF8/TNFRSF1B	TNFRSF8	g.*4063G>A		G	A	0.3012	0.6633	0.009185	0.009199
rs2042235	Analyzed	5	150378107	GPX3	GPX3	g.-2301C>T		T	C	0.1265	0.6265	0.008599	0.0127
rs631272	Analyzed	1	12129342	TNFRSF8/TNFRSF1B	TNFRSF8	g.*4166G>A		A	G	0.2831	1	0.01289	0.0132
rs6537539	Analyzed	10	50426040	ERCC6	ERCC6	g.-15023C>A		G	T	0.241	0.7271	0.008578	0.0143
rs2377902	Analyzed	10	50427510	ERCC6	ERCC6	g.-16493C>T		G	A	0.253	1	0.009598	0.0144
rs1144943	Analyzed	12	67486012	MDM2	MDM2	g.-3246G>T		G	T	0.247	0.1552	0.01515	0.0145
rs2245000	Analyzed	16	3016000	TNFRSF12A	WDR58	g.IVS3+10C>G		G	C	0.259	0.3107	0.01029	0.0167
rs12139150	Analyzed	1	159737129	FCGR2A	FCGR2A	g.-4752C>G		C	G	0.1867	0.2448	0.02349	0.018
rs11927521	Analyzed	3	161199779	IL12A	IL12A	g.*3738A>G		G	A	0.1807	0.7008	0.01265	0.0201
rs3181175	Analyzed	11	104380471	CASP4/CASP5/CASP1	CASP5	g.IVS2-1151A>G		C	T	0.07229	0.4634	0.01464	0.0209
rs816060	Analyzed	1	12142497	TNFRSF8/TNFRSF1B	TNFRSF1B	g.-7238G>A		G	A	0.3012	1	0.02341	0.0211
rs630542	Analyzed	1	12129453	TNFRSF8/TNFRSF1B	TNFRSF8	g.*4277T>G		T	G	0.2892	0.6633	0.02157	0.0212
rs344596	Analyzed	19	6545274	TNFSF7	TNFSF7	g.-3260T>C		G	A	0.1265	1	0.01209	0.0214
rs17772565	Analyzed	5	131980304	RAD50	RAD50	g.IVS20+583C>T		T	C	0.3133	1	0.01437	0.0214
rs168259	Analyzed	19	6546779	TNFSF7	TNFSF7	g.-4765T>C		A	G	0.1205	1	0.01996	0.0262
rs4961165	Analyzed	8	91076707	NBN	DECR1	g.-6189C>G		G	C	0.2952	0.7432	0.02074	0.0262
rs2304579	Analyzed	15	38778445	RAD51	RAD51	g.IVS2+110A>G		G	A	0.1145	1	0.02444	0.0266
rs6060843	Analyzed	20	29760708	BCL2L1	BCL2L1	g.IVS2+12411C>G		C	G	0.4036	0.0004051	0.1949	0.0291
rs1800871	Analyzed	1	205013257	IL10/IL19	IL10	g.-853C>T		G	A	0.2771	0.6265	0.01971	0.0304
rs4646047	Analyzed	1	15704370	CASP9	CASP9	g.IVS5-530A>G		T	C	0.3735	0.45	0.03345	0.0326
rs3025000	Analyzed	6	43854147	VEGF	VEGF	g.IVS3-28C>T		T	C	0.4277	0.76	0.02972	0.0341
rs3917016	Analyzed	1	100973735	VCAM1	VCAM1	g.IVS8+823T>A		A	T	0.1867	1	0.0343	0.0349
rs7653097	Analyzed	3	161173547	IL12A	IL12A	g.-15990C>T		C	T	0.1341	0.3092	0.05041	0.0353
rs12605881	Analyzed	18	59092421	BCL2	BCL2	g.IVS2+43746T>A		T	A	0.3537	1	0.02841	0.0361
rs3088374	Analyzed	2	127778518	ERCC3	MAP3K2	g.*3106A>G		T	C	0.2289	0.008908	0.05335	0.0369
rs2243148	Analyzed	3	161198105	IL12A	IL12A	g.*2064C>T		C	T	0.1145	0.3107	0.02444	0.0375
rs833057	Analyzed	6	43835008	VEGF	VEGF	g.-11413G>T		T	G	0.4819	1	0.04286	0.0397
rs2682585	Analyzed	19	48773128	XRCC1	XRCC1	g.-1677T>C		A	G	0.07317	1	0.02079	0.0404
rs4253082	Analyzed	10	50387592	ERCC6	ERCC6	g.IVS5-3528G>A		T	C	0.4699	0.7422	0.04224	0.0406
rs743562	Analyzed	5	131900282	IL5	IL5	g.*5119G>A		C	T	0.4458	0.2183	0.0441	0.0424
rs4253079	Analyzed	10	50392831	ERCC6	ERCC6	g.IVS5-8767A>C		G	T	0.1687	0.4153	0.03213	0.0444
rs281432	Analyzed	19	10251658	ICAM1/ICAM4/ICAM5	ICAM1	g.IVS2-3499C>G		G	C	0.3614	0.1251	0.06845	0.0452
rs10800309	Analyzed	1	159738782	FCGR2A	FCGR2A	g.-3099G>A		G	A	0.2048	0.6943	0.04527	0.0497
rs3759324	Analyzed	12	6355922	TNFRSF1A/LTBR/TNFRSF7	SCNN1A	g.-1711G>A		T	C	0.3897	0.6803	0.04416	0.05039
rs344589	Analyzed	19	6541789	TNFSF7	TNFSF7	g.IVS1+63T>C		G	A	0.1402	1	0.04298	0.05069
rs2834168	Analyzed	21	33572661	IL10RB	IL10RB	g.IVS3-1266A>G		G	A	0.2561	1	0.07361	0.05289
rs7516435	Analyzed	1	15741279	CASP9	DNAJC16	g.IVS4-2202A>G		A	G	0.4277	0.7314	0.05673	0.05299
rs1061624	Analyzed	1	12189852	TNFRSF8/TNFRSF1B	TNFRSF1B	g.Ex10+469A>G		A	G	0.4074	0.0637	0.07367	0.05519
rs5030411	Analyzed	11	36490329	TRAF6/RAG1/RAG2	TRAF6	g.-10687C>T		G	A	0.3253	1	0.03608	0.05589
rs3793786	Analyzed	10	50413094	ERCC6	ERCC6	g.IVS1-2064C>T		G	A	0.4815	0.7493	0.08041	0.05629
rs2717701	Analyzed	16	3006169	TNFRSF12A	CLDN9	g.IVS1-125C>G		C	G	0.1867	1	0.0343	0.05699
rs583911	Analyzed	3	161193084	IL12A	IL12A	g.IVS2-409G>A		A	G	0.3012	1	0.03299	0.05779
rs3747811	Analyzed	8	42248662	IKBKB	IKBKB	g.IVS1-96A>T		A	T	0.4819	0.3436	0.04403	0.05809
rs2165090	Analyzed	1	159724261	FCGR2A	FCGR2A	g.-17620C>A		A	C	0.4277	0.5415	0.06289	0.05849
rs11681263	Analyzed	2	111584481	BCL2L11	BCL2L11	g.-13312C>A		A	C	0.1928	0.406	0.041	0.05919
rs1470053	Analyzed	2	111632417	BCL2L11	BCL2L11	g.IVS6+4465G>T		T	G	0.1928	0.406	0.041	0.05919
rs4253145	Analyzed	10	50369842	ERCC6	ERCC6	g.IVS8+1327T>C		G	A	0.4024	0.2944	0.05603	0.05959
rs7711825	Analyzed	5	82557374	XRCC4	XRCC4	g.IVS6+20878C>A		C	A	0.3072	0.09758	0.05069	0.06059
rs7907519	Analyzed	10	115431673	CASP7	CASP7	g.IVS2+1946A>C		A	C	0.2349	1	0.05387	0.06219
rs16976728	Analyzed	16	27289213	IL4R	IL4R	g.*6560C>T		C	T	0.4759	0.5139	0.06113	0.06499
rs3800262	Analyzed	6	350900	IRF4	IRF4	g.IVS8+770A>G		A	G	0.07831	1	0.04803	0.06589
rs16902357	Analyzed	8	128807241	MYC	MYC	g.-10780C>T		T	C	0.1205	1	0.0643	0.06699
rs2508678	Analyzed	11	93788997	MRE11A	MRE11A	g.*3941A>G		T	C	0.4817	0.3355	0.08345	0.07089
rs4150383	Analyzed	13	102325231	ERCC5	ERCC5	g.IVS14-427G>A		A	G	0.06024	0.3137	0.04586	0.07169
rs2285714	Analyzed	4	110858259	CASP6	PLA2G12A	g.Ex3+60G>A	p.E115E	T	C	0.2229	0.01775	0.07812	0.07169
rs9651713	Analyzed	11	104379967	CASP4/CASP5/CASP1	CASP5	g.IVS2-647C>T		A	G	0.06024	0.3137	0.04586	0.07189
rs6733127	Analyzed	2	24179309	TP53I3	PFN4	g.*12647T>C		G	A	0.3171	0.2448	0.09333	0.07279
rs866236	Analyzed	6	43834934	VEGF	VEGF	g.-11487C>T		C	T	0.5	0.5234	0.06248	0.07439
rs5021087	Analyzed	19	15008113	CASP14	FLJ40365	g.*13181G>T		T	G	0.3795	0.137	0.05023	0.07549
rs3212701	Analyzed	19	17818024	JAK3	JAK3	g.IVS1+1731G>A		T	C	0.378	0.7537	0.0533	0.07569
rs12161719	Analyzed	10	50435545	ERCC6	ERCC6	g.-24528T>A		T	A	0.4699	1	0.08541	0.07669
rs915047	Analyzed	13	107648692	LIG4/TNFSF13B	LIG4	g.*10189T>C		G	A	0.1807	0.2053	0.03661	0.07739
rs2518144	Analyzed	12	8650712	AICDA	AICDA	g.IVS2+16G>A		C	T	0.1084	1	0.05202	0.07969
rs2869492	Analyzed	16	11978842	TNFRSF17	RUNDC2A	g.IVS1+671T>C		T	C	0.1747	1	0.077	0.08369
rs6470522	Analyzed	8	91023657	NBN	NBN	g.IVS15+1000T>C		A	G	0.2771	1	0.06719	0.08389
rs12613347	Analyzed	2	201763557	CASP10/CASP8	CASP10	g.IVS3-2395C>T		T	C	0.3614	0.2681	0.06845	0.08599
rs2282657	Analyzed	11	104383013	CASP4/CASP5/CASP1	CASP5	g.IVS2+7T>C		G	A	0.2229	1	0.07812	0.08709
rs12130370	Analyzed	1	15683211	CASP9	ELA2B	g.IVS5+729T>C		T	C	0.3855	0.717	0.07333	0.09069
rs2705897	Analyzed	4	185790092	CASP3	CASP3	g.IVS5-4A>C		G	T	0.2108	0.5649	0.1026	0.09109
rs2720376	Analyzed	4	185791294	CASP3	CASP3	g.IVS4-750G>A		T	C	0.2108	0.5649	0.1026	0.09109
rs3213255	Analyzed	19	48769347	XRCC1	XRCC1	g.IVS2+1555C>T		G	A	0.07831	1	0.04803	0.09129
rs10958713	Analyzed	8	42299873	IKBKB	IKBKB	g.IVS19+704C>T		C	T	0.5	1	0.06248	0.09169
rs5029748	Analyzed	8	42259706	IKBKB	IKBKB	g.IVS2-5603G>T		G	T	0.5	1	0.06248	0.09169
rs3792797	Analyzed	5	150382084	GPX3	GPX3	g.IVS1+1589A>C		A	C	0.07229	0.3879	0.06551	0.09259
rs8018193	Analyzed	14	34955498	NFKBIA	NFKBIA	g.-11896T>C		A	G	0.3554	0.3465	0.05755	0.09469
rs2834167	Analyzed	21	33562658	IL10RB	IL10RB	g.Ex2-35A>G	p.K47E	A	G	0.488	0.5301	0.06293	0.09599
rs7242402	Analyzed	18	59092938	BCL2	BCL2	g.IVS2+43229G>A		T	C	0.1024	1	0.08192	0.09719
rs8085707	Analyzed	18	59080760	BCL2	BCL2	g.IVS2+55407A>G		T	C	0.1024	1	0.08192	0.09719
rs3744355	Analyzed	17	30313159	LIG3	CCDC16	g.Ex1+471G>C	p.S154T	C	G	0.3434	1	0.09182	0.09739
rs8008601	Analyzed	14	34957182	NFKBIA	DNAJC8P1	g.NC_-11525C>T		T	C	0.3916	0.2086	0.06095	0.09769
rs1805812	Analyzed	8	91034229	NBN	NBN	g.IVS12+419A>G		C	T	0.1747	1	0.077	0.09779
rs7567444	Analyzed	2	111579909	BCL2L11	ACOXL	g.*12362C>T		T	C	0.4518	0.1996	0.1153	0.09879
rs3181360	Analyzed	9	116731379	TNFSF8	TNFSF8	g.IVS1+831G>A		T	C	0.1807	0.6573	0.09166	0.1012
rs699946	Analyzed	6	43840647	VEGF	VEGF	g.-5774A>G		G	A	0.4217	0.76	0.08831	0.1034
rs1591474	Analyzed	1	100940709	VCAM1	VCAM1	g.-17295C>T		T	C	0.1145	1	0.07799	0.1039
rs3730536	Analyzed	12	67498277	MDM2	MDM2	g.IVS5+1285A>G		A	G	0.4398	1	0.06321	0.1047
rs730775	Analyzed	6	44340052	NFKBIE	NFKBIE	g.IVS1+645T>C		G	A	0.3735	0.7527	0.08462	0.1052
rs1541373	Analyzed	4	110848343	CASP6	CASP6	g.-4342G>A		C	T	0.4639	1	0.1169	0.1068
rs13232006	Analyzed	7	152022832	XRCC2	XRCC2	g.-18734G>C		G	C	0.122	1	0.07295	0.1074
rs11935252	Analyzed	4	154851512	TLR2	RNF175	g.IVS8-421T>C		G	A	0.2134	0.2413	0.08629	0.1084
rs7561460	Analyzed	2	101983636	IL1R2	IL1R2	g.IVS2+1626T>C		T	C	0.4819	1	0.08854	0.109
rs3733611	Analyzed	4	110823233	CASP6	FLJ20647	g.Ex5+47T>C	p.S78S	T	C	0.488	0.3465	0.1196	0.11
rs5030606	Analyzed	4	110828416	CASP6	FLJ20647	g.*218G>A		G	A	0.488	0.3465	0.1196	0.11
rs9369421	Analyzed	6	43870100	VEGF	VEGF	g.*9756C>T		C	T	0.2169	0.6943	0.1122	0.1109
rs3769825	Analyzed	2	201819625	CASP10/CASP8	CASP8	g.IVS2-11399A>G		G	A	0.247	1	0.08749	0.1122
rs232006	Analyzed	3	173730839	TNFSF10	TNFSF10	g.-6970A>G		T	C	0.3373	0.4623	0.1258	0.1126
rs2069772	Analyzed	4	123592583	IL2	IL2	g.IVS3-116A>G		C	T	0.07229	1	0.07925	0.1151
rs3859419	Analyzed	19	50184973	RELB	CLPTM1	g.IVS9-520T>G		T	G	0.0679	1	0.1087	0.1156
rs4872067	Analyzed	8	23076032	TNFRSF10B/TNFRSF10C/TNFRSF10D/TNFRSF10A	TNFRSF10D	g.IVS1+1212T>A		A	T	0.3841	0.2741	0.0774	0.116
rs281440	Analyzed	19	10261304	ICAM1/ICAM4/ICAM5	ICAM5	g.-415G>A		G	A	0.439	0.221	0.1156	0.1167
rs4647610	Analyzed	4	185804925	CASP3	CASP3	g.IVS2+1688G>A		C	T	0.3976	0.0857	0.1443	0.1169
rs6760053	Analyzed	2	111649468	BCL2L11	BCL2L11	g.*11188C>G		G	C	0.4036	0.1205	0.1208	0.1177
rs9904659	Analyzed	17	16778369	TNFRSF13B	LOC96597	g.-1717G>A		C	T	0.4277	1	0.1115	0.1181
rs16980286	Analyzed	19	15035953	CASP14	CASP14	g.*8052C>T		C	T	0.1325	1	0.07661	0.1229
rs10875328	Analyzed	1	100941916	VCAM1	VCAM1	g.-16088A>G		A	G	0.1386	1	0.1021	0.124
rs6731176	Analyzed	2	127787473	ERCC3	MAP3K2	g.IVS14+1327G>A		C	T	0.3313	0.1996	0.1111	0.1259
rs7621003	Analyzed	3	49386408	GPX1	RHOA	g.IVS2+1463A>G		T	C	0.09639	1	0.1034	0.1261
rs3744358	Analyzed	17	30361027	LIG3	RFFL	g.Ex8-784A>C		G	T	0.05422	0.2431	0.07993	0.1279
rs9326349	Analyzed	11	104420179	CASP4/CASP5/CASP1	CASP1	g.-9128G>C		C	G	0.2169	1	0.1122	0.1294
rs4985767	Analyzed	17	16835885	TNFRSF13B	TNFRSF13B	g.-19770T>C		G	A	0.1928	0.6736	0.09894	0.1317
rs895495	Analyzed	2	113616229	IL1RN	IL1RN	g.*9309G>A		G	A	0.09639	0.5379	0.1034	0.1318
rs762009	Analyzed	14	34960612	NFKBIA	DNAJC8P1	g.NC_-8095A>G		A	G	0.3916	0.2944	0.1042	0.132
rs4796030	Analyzed	17	30354263	LIG3	LIG3	g.Ex20-19A>C		C	A	0.3916	0.7537	0.1198	0.1359
rs8179353	Analyzed	1	12106962	TNFRSF8/TNFRSF1B	TNFRSF8	g.IVS10+491T>C		T	C	0.3795	0.4906	0.1014	0.1375
rs739733	Analyzed	4	110821485	CASP6	FLJ20647	g.IVS4-1702A>G		G	A	0.08434	1	0.1034	0.1383
rs3087266	Analyzed	2	113605571	IL1RN	IL1RN	g.IVS6+366C>T		C	T	0.2941	0.247	0.1766	0.1397
rs3829264	Analyzed	11	129269778	NFRKB	NFRKB	g.-1784A>G		T	C	0.4217	0.05873	0.08831	0.1401
rs2534711	Analyzed	12	6441082	TNFRSF1A/LTBR/TNFRSF7	TNFRSF1A/LTBR/TNFRSF7	g.IVS6-379T>G		G	T	0.3795	1	0.1185	0.1404
rs9891079	Analyzed	17	16830946	TNFRSF13B	TNFRSF13B	g.-14831T>G		A	C	0.3855	0.1552	0.1411	0.1407
rs4150506	Analyzed	2	127737016	ERCC3	ERCC3	g.IVS12-1624C>T		A	G	0.2229	0.03901	0.1649	0.1452
rs4756077	Analyzed	11	33864531	LMO2	LMO2	g.IVS1-4522A>C		T	G	0.3133	0.7008	0.1167	0.1459
rs1161662	Analyzed	11	129284897	NFRKB	PRDM10	g.IVS20+684G>A		C	T	0.07229	0.03704	0.07925	0.1471
rs2243750	Analyzed	12	6438048	TNFRSF1A/LTBR/TNFRSF7	TNFRSF1A/LTBR/TNFRSF7	g.IVS4-24T>C		C	T	0.3354	1	0.1366	0.1474
rs963248	Analyzed	5	82569650	XRCC4	XRCC4	g.IVS6-20455T>C		T	C	0.2771	0.1552	0.1379	0.1474
rs3093030	Analyzed	19	10258403	ICAM1/ICAM4/ICAM5	ICAM1	g.*1439C>T		T	C	0.3133	0.7008	0.1167	0.1477
rs949963	Analyzed	2	102136218	IL1R1	IL1R1	g.-4398T>C		T	C	0.1928	0.5704	0.1341	0.1492
rs3789882	Analyzed	9	116709520	TNFSF8	TNFSF8	g.IVS2-1520T>A		T	A	0.1747	0.6537	0.133	0.1495
rs9811792	Analyzed	3	161179692	IL12A	IL12A	g.-9845C>T		T	C	0.3554	0.5323	0.1153	0.1508
rs2854501	Analyzed	19	48751841	XRCC1	XRCC1	g.IVS3-1045T>C		A	G	0.07229	1	0.07925	0.1578
rs1650815	Analyzed	11	129285178	NFRKB	PRDM10	g.IVS20+403G>A		T	C	0.4518	0.3226	0.1153	0.1591
rs997049	Analyzed	2	102148865	IL1R1	IL1R1	g.IVS4-140T>A		A	T	0.3795	0.2081	0.1185	0.1596
rs6596271	Analyzed	5	135248728	IL9	LOC153328	g.IVS4-2892A>G		G	A	0.06627	0.3137	0.1092	0.1603
rs3766160	Analyzed	1	15681459	CASP9	ELA2B	g.Ex4-17G>A	p.D114N	G	A	0.4458	0.5235	0.1549	0.1614
rs3358	Analyzed	8	91055866	NBN	NBN	g.IVS6-3172G>A		T	C	0.2317	1	0.1904	0.1623
rs1045261	Analyzed	12	6799898	CD4	CD4	g.Ex10-338T>C		C	T	0.4217	0.7415	0.1501	0.1656
rs11777697	Analyzed	8	23144929	TNFRSF10B/TNFRSF10C/TNFRSF10D/TNFRSF10A	LOC389641	g.*1500C>G		G	C	0.3976	1	0.163	0.1675
rs8177441	Analyzed	5	150386187	GPX3	GPX3	g.IVS2-467G>C		G	C	0.3963	0.7537	0.1508	0.168
rs6596945	Analyzed	6	3016912	RIPK1	RIPK1	g.-5144A>C		A	C	0.247	0.1251	0.1774	0.1683
rs3924519	Analyzed	8	23060574	TNFRSF10B/TNFRSF10C/TNFRSF10D/TNFRSF10A	TNFRSF10D	g.IVS3-44A>G		T	C	0.1386	1	0.1309	0.1698
rs3212711	Analyzed	19	17816021	JAK3	JAK3	g.IVS2+22C>T		A	G	0.3333	1	0.1198	0.1711
rs4150441	Analyzed	2	127757385	ERCC3	ERCC3	g.IVS8-2708A>G		T	C	0.3373	0.1996	0.1544	0.1713
rs17056704	Analyzed	5	158700244	IL12B	IL12B	g.-13875G>C		C	G	0.3133	0.5008	0.1488	0.173
rs10438740	Analyzed	17	7413608	TRADD	SENP3	g.IVS7-790G>A		A	G	0.4217	0.7415	0.1501	0.1732
rs500558	Analyzed	11	93810322	MRE11A	MRE11A	g.IVS16-273G>A		C	T	0.439	0.7516	0.1246	0.1742
rs3087920	Analyzed	11	129234077	NFRKB	TMEM45B	g.Ex6+399C>G		G	C	0.1627	0.04504	0.1234	0.1748
rs10836126	Analyzed	11	33862777	LMO2	LMO2	g.IVS1-2768G>A		C	T	0.2439	1	0.2014	0.1748
rs8037430	Analyzed	15	89124274	BLM	BLM	g.IVS12-2782C>T		T	C	0.1524	1	0.1649	0.1764
rs1650817	Analyzed	11	129278734	NFRKB	PRDM10	g.IVS21-1113G>T		C	A	0.4819	0.1155	0.1604	0.1785
rs3138045	Analyzed	14	34947472	NFKBIA	NFKBIA	g.-3870A>G		C	T	0.1265	0.2431	0.1152	0.1801
rs1055141	Analyzed	12	6796624	CD4	CD4	g.Ex7+68T>C	p.S341S	T	C	0.1024	1	0.1827	0.1806
rs12211228	Analyzed	6	353833	IRF4	IRF4	g.Ex9+1379G>C		C	G	0.1173	1	0.1634	0.1809
rs507879	Analyzed	11	104383137	CASP4/CASP5/CASP1	CASP5	g.Ex2-118A>G	p.T90A	C	T	0.2108	0.7008	0.1579	0.1843
rs2028373	Analyzed	12	8648748	AICDA	AICDA	g.Ex4+38C>T	p.H155H	A	G	0.4277	0.7432	0.2013	0.1845
rs3021094	Analyzed	1	205011575	IL10/IL19	IL10	g.IVS1-192A>C		G	T	0.4277	0.76	0.1221	0.1855
rs10507	Analyzed	6	37250400	PIM1	PIM1	g.Ex6+713C>T		T	C	0.07927	1	0.1484	0.1886
rs1059840	Analyzed	19	10231490	ICAM1/ICAM4/ICAM5	MRPL4	g.Ex8-247T>A		A	T	0.09375	1	0.1751	0.1898
rs4379670	Analyzed	1	152706489	IL6R	IL6R	g.Ex10-324T>A		T	A	0.06024	1	0.1789	0.1901
rs4872052	Analyzed	8	23010877	TNFRSF10B/TNFRSF10C/TNFRSF10D/TNFRSF10A	TNFRSF10C	g.-5702T>C		C	T	0.3193	0.4306	0.1639	0.191
rs16902359	Analyzed	8	128812033	MYC	MYC	g.-5988C>T		T	C	0.3675	0.717	0.1833	0.1923
rs8089538	Analyzed	18	59094531	BCL2	BCL2	g.IVS2+41636T>C		G	A	0.2229	1	0.1649	0.1927
rs649392	Analyzed	11	69173974	CCND1	CCND1	g.IVS4-1093G>A		G	A	0.09036	0.4634	0.1607	0.1953
rs1351554	Analyzed	17	30321178	LIG3	LIG3	g.-12959C>T		T	C	0.09036	0.4634	0.1607	0.1968
rs3734075	Analyzed	11	129287006	NFRKB	PRDM10	g.IVS19+184G>A		T	C	0.4458	0.3226	0.1549	0.1976
rs2518968	Analyzed	15	89108414	BLM	BLM	g.IVS8+1023C>G		G	C	0.3675	1	0.1833	0.201
rs7152826	Analyzed	14	34932155	NFKBIA	NFKBIA	g.*8814T>G		A	C	0.25	0.2788	0.149	0.2026
rs10805066	Analyzed	4	74811254	IL8	IL8	g.-13985C>G		G	C	0.2048	0.4016	0.2177	0.2055
rs1560725	Analyzed	19	50235627	RELB	SFRS16	g.IVS2+218C>T		T	C	0.4819	0.7574	0.1638	0.2074
rs2270418	Analyzed	3	173723693	TNFSF10	TNFSF10	g.IVS1+44A>C		G	T	0.4699	0.5392	0.1644	0.2087
rs4850994	Analyzed	2	102020660	IL1R2	IL1R2	g.*9373A>G		A	G	0.2134	0.5751	0.2413	0.209
rs3811699	Analyzed	3	49371364	GPX1	GPX1	g.-648A>G		C	T	0.1024	1	0.1827	0.2101
rs12441424	Analyzed	15	89046939	BLM	BLM	g.-44687G>A		G	A	0.4759	0.5234	0.211	0.2108
rs610611	Analyzed	11	93843516	MRE11A	MRE11A	g.IVS8-60T>A		A	T	0.1951	1	0.1814	0.2115
rs3024685	Analyzed	16	27284411	IL4R	IL4R	g.*1758C>T		T	C	0.4759	1	0.211	0.2117
rs8832	Analyzed	16	27283288	IL4R	IL4R	g.Ex12-313A>G		G	A	0.4759	1	0.211	0.2117
rs3752451	Analyzed	13	31798933	BRCA2	BRCA2	g.IVS7+183T>A		T	A	0.4578	1	0.1648	0.2118
rs10807995	Analyzed	7	151968495	XRCC2	XRCC2	g.*8164C>T		A	G	0.488	0.3436	0.2128	0.2121
rs2720378	Analyzed	4	185805107	CASP3	CASP3	g.IVS2+1506G>C		C	G	0.3855	0.0857	0.249	0.2136
rs3789068	Analyzed	2	111625718	BCL2L11	BCL2L11	g.IVS5+1523A>G		G	A	0.4157	0.1205	0.2174	0.215
rs4733225	Analyzed	8	31096934	WRN	WRN	g.IVS20-367T>C		C	T	0.247	1	0.1774	0.2156
rs2116492	Analyzed	19	53351117	LIG1	LIG1	g.IVS5+966T>G		A	C	0.3554	0.4596	0.1789	0.2157
rs11574309	Analyzed	8	31094542	WRN	WRN	g.IVS20+956G>A		A	G	0.259	0.7208	0.1829	0.2167
rs7243091	Analyzed	18	59031542	BCL2	BCL2	g.IVS2-84570C>T		A	G	0.1747	0.128	0.174	0.2176
rs646249	Analyzed	1	12102711	TNFRSF8/TNFRSF1B	TNFRSF8	g.IVS8-3217G>A		G	A	0.4277	1	0.2013	0.2199
rs16944739	Analyzed	15	89055629	BLM	BLM	g.-35997T>C		T	C	0.4085	0.5232	0.1701	0.2206
rs2070776	Analyzed	17	59361230	CD79B	CD79B	g.Ex3-65T>C	p.C122C	G	A	0.4518	1	0.2067	0.2212
rs1800627	Analyzed	4	110833107	CASP6	CASP6	g.IVS5-1493T>C		G	A	0.3976	0.7537	0.163	0.2219
rs4921468	Analyzed	5	158668511	IL12B	IL12B	g.*7759C>T		A	G	0.2108	1	0.2106	0.222
rs4862401	Analyzed	4	185825341	CASP3	FLJ33167	g.IVS6+1129G>C		C	G	0.3494	0.2788	0.2346	0.2223
rs1077667	Analyzed	19	6619972	TNFSF14	TNFSF14	g.IVS2+890G>A		T	C	0.3554	1	0.1789	0.2247
rs2243115	Analyzed	3	161188974	IL12A	IL12A	g.-563G>T		G	T	0.07229	1	0.2141	0.2251
rs17692629	Analyzed	13	31874608	BRCA2	CG018	g.Ex7+730T>C		G	A	0.3373	0.45	0.2291	0.2266
rs7337784	Analyzed	13	31855972	BRCA2	BRCA2	g.IVS24+3690G>C		C	G	0.3373	0.45	0.2291	0.2266
rs7907557	Analyzed	10	50330515	ERCC6	ERCC6	g.*6351G>A		C	T	0.4573	0.1208	0.1662	0.2267
rs10503078	Analyzed	18	58951168	BCL2	BCL2	g.IVS2-4196C>T		A	G	0.3976	0.7537	0.163	0.227
rs739719	Analyzed	5	131900764	IL5	IL5	g.*4637G>T		A	C	0.2048	1	0.2177	0.2279
rs2859228	Analyzed	1	170879864	FASLG	FASLG	g.-15100A>G		G	A	0.2952	1	0.1965	0.229
rs808964	Analyzed	11	2343176	CD81	CD81	g.-12179A>G		A	G	0.2378	1	0.1992	0.2299
rs4787948	Analyzed	16	27248560	IL4R	IL4R	g.IVS1-328A>G		A	G	0.4398	0.7422	0.2041	0.2299
rs13278062	Analyzed	8	23138916	TNFRSF10B/TNFRSF10C/TNFRSF10D/TNFRSF10A	TNFRSF10A	g.-396->C>A		T	G	0.3916	1	0.2158	0.2328
rs4145212	Analyzed	13	107758189	LIG4/TNFSF13B	TNFSF13B	g.*901A>T		T	A	0.4217	0.7542	0.1645	0.2336
rs9520836	Analyzed	13	107755064	LIG4/TNFSF13B	TNFSF13B	g.IVS5+1111A>G		A	G	0.4217	0.7542	0.1645	0.2336
rs1389623	Analyzed	19	6635197	TNFSF14	C3	g.IVS33+202C>T		A	G	0.07229	1	0.2141	0.2346
rs344555	Analyzed	19	6630360	TNFSF14	C3	g.IVS37+58A>G		T	C	0.3795	0.7271	0.1874	0.2347
rs7296859	Analyzed	12	6764425	CD4	CD4	g.-15140C>G		C	G	0.3313	0.7432	0.2064	0.2388
rs3731007	Analyzed	19	53318416	LIG1	LIG1	g.IVS21-29C>T		A	G	0.2099	0.3107	0.2155	0.2446
rs919002	Analyzed	8	31153537	WRN	WRN	g.*3376C>T		C	T	0.3456	1	0.2496	0.2453
rs17102087	Analyzed	1	46499891	RAD54L	RAD54L	g.IVS8+247C>T		T	C	0.1159	0.5704	0.2225	0.246
rs8249	Analyzed	17	30314050	LIG3	CCDC16	g.Ex1-269A>T		A	T	0.1807	0.3651	0.1994	0.2471
rs956572	Analyzed	18	58971551	BCL2	BCL2	g.IVS2-24579T>C		G	A	0.4819	0.7574	0.1638	0.2492
rs4968200	Analyzed	17	7389181	TRADD	TNFSF12	g.-4013C>G		C	G	0.3675	0.3321	0.213	0.2498
rs12700386	Analyzed	7	22729534	IL6	IL6	g.-3872G>C		G	C	0.08434	1	0.2443	0.25
rs2056576	Analyzed	7	22727727	IL6	IL6	g.-5679C>T		T	C	0.08434	1	0.2443	0.25
rs2069840	Analyzed	7	22735097	IL6	IL6	g.IVS3+147C>G		G	C	0.08434	1	0.2443	0.25
rs2243498	Analyzed	21	33575536	IL10RB	IL10RB	g.IVS4+1443G>A		A	G	0.247	0.6633	0.2416	0.2507
rs4808901	Analyzed	19	15018276	CASP14	CASP14	g.-5786C>T		T	C	0.4146	0.2086	0.2048	0.251
rs833052	Analyzed	6	43831313	VEGF	VEGF	g.-15108A>C		A	C	0.2771	0.2741	0.2557	0.2511
rs4851520	Analyzed	2	101976707	IL1R2	IL1R2	g.IVS1+1802G>C		C	G	0.3415	1	0.2745	0.2511
rs2069882	Analyzed	5	135257532	IL9	IL9	g.IVS4+76A>G		C	T	0.06024	0.2431	0.1789	0.2522
rs2061783	Analyzed	5	82491914	XRCC4	XRCC4	g.IVS3-35431T>C		T	C	0.4398	0.1248	0.2179	0.2527
rs9644029	Analyzed	8	23002369	TNFRSF10B/TNFRSF10C/TNFRSF10D/TNFRSF10A	TNFRSF10C	g.-14210A>G		G	A	0.241	0.4623	0.2394	0.2527
rs1875324	Analyzed	6	44330988	NFKBIE	SLC35B2	g.Ex4+372C>A	p.T244T	T	G	0.3554	1	0.2111	0.2528
rs11619378	Analyzed	13	107679090	LIG4/TNFSF13B	C13orf6	g.IVS1-458T>G		G	T	0.08434	1	0.2443	0.2533
rs2270939	Analyzed	19	54134745	BAX	DHDH	g.Ex5-26T>C	p.S198S	T	C	0.4819	0.05822	0.1638	0.254
rs2228526	Analyzed	10	50348723	ERCC6	ERCC6	g.Ex18+219A>G	p.M1097V	C	T	0.08434	1	0.2443	0.2549
rs3181096	Analyzed	2	204278337	CD28	CD28	g.-1327C>T		T	C	0.1928	1	0.2089	0.257
rs2234898	Analyzed	16	27281416	IL4R	IL4R	g.Ex12+343G>T	p.L414L	T	G	0.09036	1	0.192	0.2571
rs3024676	Analyzed	16	27281059	IL4R	IL4R	g.IVS11-15C>A		A	C	0.09036	1	0.192	0.2571
rs11033695	Analyzed	11	36541051	TRAF6/RAG1/RAG2	RAG1	g.-10379A>T		T	A	0.1386	1	0.2358	0.2572
rs2071336	Analyzed	16	11969175	TNFRSF17	TNFRSF17	g.Ex3+248G>A	p.T175T	A	G	0.08434	1	0.2443	0.2573
rs3917254	Analyzed	2	102142950	IL1R1	IL1R1	g.IVS2+2273G>A		A	G	0.3133	0.4306	0.2172	0.2576
rs11570151	Analyzed	16	11968080	TNFRSF17	TNFRSF17	g.IVS2+381T>C		C	T	0.1145	1	0.2024	0.2581
rs10493936	Analyzed	1	100985923	VCAM1	VCAM1	g.*9495A>T		A	T	0.4699	0.5234	0.2722	0.2595
rs11667229	Analyzed	19	54147813	BAX	BAX	g.-2184C>T		C	T	0.4337	0.5235	0.2639	0.2604
rs7656411	Analyzed	4	154847105	TLR2	TLR2	g.*1240G>T		T	G	0.4096	0.7415	0.257	0.2653
rs1026825	Analyzed	18	58971255	BCL2	BCL2	g.IVS2-24283T>C		G	A	0.3434	1	0.2089	0.2657
rs3824848	Analyzed	11	33843123	LMO2	LMO2	g.IVS4-184G>A		C	T	0.4578	0.5323	0.2697	0.2657
rs4894559	Analyzed	3	173716063	TNFSF10	TNFSF10	g.IVS1-581T>C		A	G	0.3313	1	0.296	0.2672
rs483536	Analyzed	6	44343831	NFKBIE	NFKBIE	g.-2352T>A		A	T	0.3916	1	0.2158	0.2685
rs972800	Analyzed	19	53381205	LIG1	LOC374920	g.IVS3+3369T>G		G	T	0.1829	0.1799	0.2256	0.2698
rs3758640	Analyzed	11	33871004	LMO2	LMO2	g.-23495T>C		G	A	0.3171	0.6922	0.2585	0.2704
rs12306110	Analyzed	12	8651276	AICDA	AICDA	g.IVS1-401G>C		G	C	0.1807	0.3651	0.1994	0.2714
rs3794318	Analyzed	12	8649810	AICDA	AICDA	g.IVS2-462T>C		G	A	0.1807	0.3651	0.1994	0.2714
rs2279627	Analyzed	19	6614594	TNFSF14	TNFSF14	g.*1342C>G		G	C	0.488	0.2081	0.2128	0.272
rs7552664	Analyzed	1	12200554	TNFRSF8/TNFRSF1B	LOC390998	g.*2881T>G		A	C	0.25	0.6591	0.2791	0.2721
rs344580	Analyzed	19	6560390	TNFSF7	TNFSF7	g.-18376T>C		G	A	0.1446	1	0.2075	0.2735
rs4807089	Analyzed	19	6561365	TNFSF7	TNFSF7	g.-19351G>A		C	T	0.1446	1	0.2075	0.2735
rs2910434	Analyzed	19	6532596	TNFSF7	TNFSF7	g.*4434C>A		G	T	0.1386	0.3107	0.2358	0.2743
rs861528	Analyzed	14	103252751	XRCC3	ZFYVE21	g.IVS1+682C>T		T	C	0.05882	1	0.1699	0.2771
rs4851527	Analyzed	2	101988808	IL1R2	IL1R2	g.IVS2-2601A>G		A	G	0.1747	0.1677	0.2742	0.2817
rs3917225	Analyzed	2	102135734	IL1R1	IL1R1	g.-4882G>A		G	A	0.4759	0.7542	0.2165	0.2832
rs11668388	Analyzed	19	1049809	GPX4	POLR2E	g.-3494T>A		A	T	0.259	0.07248	0.2508	0.2846
rs1001793	Analyzed	8	22956894	TNFRSF10B/TNFRSF10C/TNFRSF10D/TNFRSF10A	TNFRSF10B	g.IVS1-193G>A		T	C	0.3133	0.7314	0.2674	0.2856
rs10836129	Analyzed	11	33869024	LMO2	LMO2	g.IVS1+894A>C		T	G	0.3614	1	0.2397	0.2857
rs7006322	Analyzed	8	91048013	NBN	NBN	g.IVS8-2102G>A		T	C	0.4699	0.3465	0.2722	0.2869
rs2580873	Analyzed	12	8652941	AICDA	AICDA	g.IVS1-2066T>C		A	G	0.241	1	0.2394	0.2889
rs233998	Analyzed	3	173726440	TNFSF10	TNFSF10	g.-2571C>T		A	G	0.3193	0.4623	0.2895	0.2893
rs12943647	Analyzed	17	16826611	TNFRSF13B	TNFRSF13B	g.-10496T>C		A	G	0.4157	0.01886	0.3313	0.2911
rs2850767	Analyzed	18	59152094	BCL2	FVT1	g.IVS9+1376C>A		T	G	0.07317	1	0.2304	0.2915
rs2887286	Analyzed	1	1145994	SDF4	SDF4	g.IVS4-1824A>G		T	C	0.1506	1	0.2499	0.2924
rs870407	Analyzed	5	150380780	GPX3	GPX3	g.IVS1+285A>G		G	A	0.1627	1	0.2627	0.293
rs17070659	Analyzed	18	58932003	BCL2	BCL2	g.*14834G>A		C	T	0.4699	0.3465	0.2722	0.293
rs4851519	Analyzed	2	101967825	IL1R2	IL1R2	g.-23644C>T		T	C	0.1627	0.6265	0.2627	0.2938
rs2071081	Analyzed	12	6805892	CD4	GPR162	g.IVS4+113A>C		C	A	0.2651	0.08547	0.3361	0.294
rs4941185	Analyzed	18	58974534	BCL2	BCL2	g.IVS2-27562T>C		A	G	0.4695	0.5234	0.2734	0.2956
rs3917273	Analyzed	2	102146151	IL1R1	IL1R1	g.IVS2-1515A>T		A	T	0.488	0.2086	0.2155	0.2959
rs6706048	Analyzed	2	102121241	IL1R1	IL1R1	g.-19375C>G		C	G	0.2831	1	0.2677	0.2961
rs7255931	Analyzed	19	17799844	JAK3	JAK3	g.IVS23-1125G>C		G	C	0.2206	0.6454	0.3124	0.2966
rs2293664	Analyzed	11	129258201	NFRKB	NFRKB	g.IVS7+26C>G		C	G	0.4191	0.07846	0.2457	0.2977
rs2706399	Analyzed	5	131895601	IL5	IL5	g.*9800T>C		G	A	0.1687	0.5379	0.2405	0.2985
rs12051889	Analyzed	17	16803897	TNFRSF13B	TNFRSF13B	g.IVS1-7275G>A		T	C	0.1747	1	0.2742	0.3007
rs7695605	Analyzed	4	154854886	TLR2	RNF175	g.IVS7+1245G>C		G	C	0.241	0.2389	0.2394	0.3009
rs12680687	Analyzed	8	91020564	NBN	NBN	g.IVS15-2085C>A		T	G	0.4217	0.3533	0.2821	0.3023
rs3218408	Analyzed	7	151998549	XRCC2	XRCC2	g.IVS1+5510T>G		C	A	0.1446	0.3879	0.2075	0.3031
rs929087	Analyzed	1	170898680	FASLG	FASLG	g.IVS2-1417A>G		G	A	0.4217	0.7574	0.2821	0.3039
rs2720380	Analyzed	4	185819399	CASP3	FLJ33167	g.IVS4-523A>T		A	T	0.3795	0.3088	0.3181	0.3052
rs8052002	Analyzed	16	3010789	TNFRSF12A	TNFRSF12A	g.IVS1+296G>C		C	G	0.07353	1	0.2232	0.3072
rs6491711	Analyzed	13	102276476	ERCC5	BIVM	g.IVS7+3966C>T		C	T	0.494	0.3459	0.2763	0.3076
rs1554973	Analyzed	9	119520633	TLR4	TLR4	g.*3885C>T		C	T	0.1446	1	0.2075	0.3089
rs2074520	Analyzed	17	30363396	LIG3	RFFL	g.IVS7-115C>G		C	G	0.1506	0.5945	0.2499	0.3116
rs8106574	Analyzed	19	6622142	TNFSF14	TNFSF14	g.-1061G>A		T	C	0.4096	0.7415	0.257	0.3129
rs4242391	Analyzed	8	23056128	TNFRSF10B/TNFRSF10C/TNFRSF10D/TNFRSF10A	TNFRSF10D	g.IVS7+1780A>G		T	C	0.1037	1	0.24	0.3131
rs6692775	Analyzed	1	46471077	RAD54L	RAD54L	g.-15587T>G		T	G	0.08537	1	0.2636	0.3132
rs1181389	Analyzed	2	204283135	CD28	CD28	g.IVS1+3419T>C		C	T	0.06024	1	0.2057	0.3135
rs11663788	Analyzed	18	59148758	BCL2	FVT1	g.*1236A>G		C	T	0.06024	1	0.2057	0.3138
rs4985700	Analyzed	17	16806800	TNFRSF13B	TNFRSF13B	g.IVS1+9254G>T		C	A	0.1867	1	0.2845	0.3139
rs10857092	Analyzed	4	123608669	IL2	IL2	g.-11623T>C		A	G	0.4458	0.3586	0.2818	0.3151
rs292241	Analyzed	6	90660226	CASP8AP2	CX62	g.-682G>A		G	A	0.06024	1	0.2057	0.3171
rs10425745	Analyzed	19	15030836	CASP14	CASP14	g.*2935A>T		A	T	0.1627	0.1499	0.2627	0.3195
rs3769683	Analyzed	2	204287042	CD28	CD28	g.IVS1+7326A>G		G	A	0.4458	0.1248	0.2818	0.3198
rs1381548	Analyzed	18	59108376	BCL2	BCL2	g.IVS2+27791C>T		A	G	0.3193	0.4623	0.2895	0.321
rs10768219	Analyzed	11	36579047	TRAF6/RAG1/RAG2	LOC119710	g.IVS1+6329C>T		C	T	0.1807	1	0.2554	0.3223
rs13019803	Analyzed	2	102142634	IL1R1	IL1R1	g.IVS2+1957C>T		T	C	0.2048	1	0.2823	0.3293
rs4645956	Analyzed	8	128819394	MYC	MYC	g.IVS1-282C>T		T	C	0.1386	1	0.2886	0.3298
rs1008563	Analyzed	2	218735133	IL8RB/IL8RA	IL8RA	g.*1993C>T		A	G	0.2349	0.6943	0.3166	0.3317
rs2040107	Analyzed	21	33597832	IL10RB	IL10RB	g.*7299C>G		C	G	0.2892	0.2448	0.3533	0.3344
rs235214	Analyzed	1	12194090	TNFRSF8/TNFRSF1B	TNFRSF1B	g.*4425C>T		T	C	0.3841	0.2999	0.3803	0.3345
rs3805435	Analyzed	5	150381489	GPX3	GPX3	g.IVS1+994T>C		C	T	0.4634	0.5234	0.3474	0.3347
rs274860	Analyzed	19	53349432	LIG1	LIG1	g.IVS5-396C>T		A	G	0.2048	0.3107	0.2823	0.3357
rs17177717	Analyzed	10	50434509	ERCC6	ERCC6	g.-23492T>C		G	A	0.3675	0.2944	0.3131	0.3364
rs3778607	Analyzed	6	348799	IRF4	IRF4	g.IVS7-1219A>G		G	A	0.2229	1	0.3098	0.3369
rs4077341	Analyzed	8	23018293	TNFRSF10B/TNFRSF10C/TNFRSF10D/TNFRSF10A	TNFRSF10C	g.IVS1+1654T>G		T	G	0.2952	0.406	0.2754	0.3371
rs9907308	Analyzed	17	16832990	TNFRSF13B	TNFRSF13B	g.-16875T>C		A	G	0.07051	0.2611	0.3045	0.3374
rs10405655	Analyzed	19	53374591	LIG1	LOC374920	g.IVS2-2933T>C		C	T	0.1084	0.5379	0.2925	0.3394
rs4240872	Analyzed	1	152702819	IL6R	IL6R	g.IVS9-1415C>T		C	T	0.06627	1	0.3283	0.342
rs3740617	Analyzed	11	33837592	LMO2	LMO2	g.Ex6+106A>G	p.K121K	T	C	0.488	0.7537	0.3496	0.3445
rs1884056	Analyzed	14	22836431	BCL2L2	PPP1R3E	g.Ex5+1536C>T		A	G	0.4759	0.02687	0.2165	0.3459
rs2238163	Analyzed	13	31857839	BRCA2	BRCA2	g.IVS24+5557A>C		A	C	0.4337	1	0.2821	0.3465
rs10856838	Analyzed	4	38453568	TLR10/TLR1/TLR6	TLR10	g.Ex4+101T>A	p.I13I	T	A	0.1928	1	0.2693	0.3473
rs4941189	Analyzed	18	59058907	BCL2	BCL2	g.IVS2+77260G>A		C	T	0.4217	0.04561	0.2606	0.3474
rs3850170	Analyzed	3	173734996	TNFSF10	TNFSF10	g.-11127A>G		T	C	0.1506	1	0.3078	0.3482
rs530015	Analyzed	3	161173110	IL12A	IL12A	g.-16427G>T		G	T	0.3373	1	0.2732	0.3489
rs3136607	Analyzed	3	173708468	TNFSF10	TNFSF10	g.IVS4-1065T>A		A	T	0.3735	0.3088	0.3993	0.35
rs6585241	Analyzed	10	115476600	CASP7	CASP7	g.IVS9+417G>A		G	A	0.1265	1	0.2677	0.3516
rs2639621	Analyzed	1	170876383	FASLG	FASLG	g.-18581T>G		G	T	0.3235	0.7085	0.3316	0.3538
rs951838	Analyzed	11	129236893	NFRKB	TMEM45B	g.*3102G>A		A	G	0.1386	1	0.2886	0.3553
rs911817	Analyzed	11	33865123	LMO2	LMO2	g.IVS1+4795G>A		C	T	0.311	0.6922	0.3314	0.3557
rs842636	Analyzed	2	60945454	REL	REL	g.-17025A>G		A	G	0.1627	0.02631	0.2627	0.361
rs331455	Analyzed	11	36497125	TRAF6/RAG1/RAG2	TRAF6	g.-17483G>A		C	T	0.1325	0.5649	0.3289	0.3618
rs2241721	Analyzed	19	53325976	LIG1	LIG1	g.IVS19+169A>G		T	C	0.488	0.7537	0.3496	0.3629
rs7014131	Analyzed	8	23064551	TNFRSF10B/TNFRSF10C/TNFRSF10D/TNFRSF10A	TNFRSF10D	g.IVS2-2542A>T		A	T	0.1928	0.5649	0.2693	0.3648
rs156639	Analyzed	19	53323649	LIG1	LIG1	g.IVS19-560C>T		G	A	0.1506	1	0.3078	0.3648
rs3025035	Analyzed	6	43859337	VEGF	VEGF	g.IVS7-919C>T		T	C	0.1807	0.1677	0.379	0.3648
rs7744538	Analyzed	6	90577569	CASP8AP2	MDN1	g.IVS1-7575C>T		A	G	0.2229	0.406	0.3098	0.367
rs9362695	Analyzed	6	90628104	CASP8AP2	CASP8AP2	g.IVS6-462C>T		T	C	0.2229	0.406	0.3098	0.367
rs1733448	Analyzed	11	129253947	NFRKB	NFRKB	g.IVS11-299A>G		T	C	0.4157	0.1847	0.3313	0.3671
rs1105451	Analyzed	13	107651324	LIG4/TNFSF13B	LIG4	g.*7557T>C		G	A	0.3614	0.5139	0.2774	0.3673
rs9514825	Analyzed	13	107650277	LIG4/TNFSF13B	LIG4	g.*8604G>A		T	C	0.3614	0.5139	0.2774	0.3673
rs3730994	Analyzed	19	53326110	LIG1	LIG1	g.IVS19+35G>A		T	C	0.1325	1	0.3289	0.3677
rs12677679	Analyzed	8	22967018	TNFRSF10B/TNFRSF10C/TNFRSF10D/TNFRSF10A	TNFRSF10B	g.IVS1-10317T>C		G	A	0.2073	1	0.3521	0.3681
rs9520823	Analyzed	13	107671565	LIG4/TNFSF13B	LIG4	g.-9947C>A		G	T	0.4578	0.3474	0.2813	0.3687
rs11226565	Analyzed	11	104323503	CASP4/CASP5/CASP1	CASP4	g.IVS7-374T>C		G	A	0.05422	0.1782	0.2866	0.369
rs4802436	Analyzed	19	53376624	LIG1	LOC374920	g.IVS2-900A>G		G	A	0.08434	1	0.2845	0.3696
rs2234161	Analyzed	1	2483213	TNFRSF14	TNFRSF14	g.IVS3-57C>T		G	A	0.4875	0.7507	0.3426	0.371
rs4733224	Analyzed	8	31086911	WRN	WRN	g.IVS18-1762T>C		C	T	0.2952	0.4815	0.3414	0.3722
rs10131	Analyzed	13	107657847	LIG4/TNFSF13B	LIG4	g.Ex3-57G>A		T	C	0.1386	1	0.2886	0.3738
rs11196444	Analyzed	10	115458677	CASP7	CASP7	g.IVS4+11325G>C		C	G	0.1265	0.3137	0.2677	0.3752
rs315951	Analyzed	2	113607057	IL1RN	IL1RN	g.Ex7+354C>G		C	G	0.3434	0.3239	0.3526	0.3761
rs11636338	Analyzed	15	78032645	BCL2A1	BCL2A1	g.*7818T>G		C	A	0.1951	1	0.3461	0.3768
rs2696057	Analyzed	4	185792828	CASP3	CASP3	g.IVS4+614G>C		C	G	0.1566	1	0.357	0.3769
rs9567552	Analyzed	13	31788227	BRCA2	BRCA2	g.IVS1-332G>T		T	G	0.2892	1	0.3533	0.3794
rs12661230	Analyzed	6	90592188	CASP8AP2	CASP8AP2	g.-20841A>G		G	A	0.2349	0.4306	0.3166	0.3799
rs4979476	Analyzed	9	116740531	TNFSF8	TNFSF8	g.-8126T>C		G	A	0.2771	1	0.3449	0.3809
rs2303287	Analyzed	2	24155750	TP53I3	TP53I3	g.IVS4+68G>A		T	C	0.08434	1	0.2845	0.3829
rs17056705	Analyzed	5	158701831	IL12B	IL12B	g.-15462T>C		A	G	0.1386	0.3879	0.2886	0.385
rs1016364	Analyzed	11	129250082	NFRKB	NFRKB	g.IVS16-61T>C		G	A	0.08434	1	0.2845	0.3864
rs3024548	Analyzed	16	27262032	IL4R	IL4R	g.IVS4+951C>G		C	G	0.4398	0.1901	0.3385	0.3867
rs998584	Analyzed	6	43865874	VEGF	VEGF	g.*5530C>A		C	A	0.4512	1	0.3464	0.387
rs10759743	Analyzed	9	116741573	TNFSF8	TNFSF8	g.-9168T>C		G	A	0.247	0.6967	0.3227	0.3879
rs7827210	Analyzed	8	30991198	WRN	WRN	g.-44307A>G		A	G	0.1386	0.3879	0.2886	0.388
rs875255	Analyzed	19	50185475	RELB	CLPTM1	g.IVS9-18C>G		G	C	0.4136	0.3351	0.3525	0.3883
rs3759333	Analyzed	12	6362208	TNFRSF1A/LTBR/TNFRSF7	LTBR	g.-1577C>T		T	C	0.4639	0.754	0.3446	0.3909
rs12957119	Analyzed	18	59032135	BCL2	BCL2	g.IVS2-85163T>G		C	A	0.1506	0.08605	0.3078	0.391
rs2241393	Analyzed	19	6636304	TNFSF14	C3	g.IVS29-147C>G		G	C	0.3373	0.7208	0.382	0.3912
rs3763009	Analyzed	5	150392333	GPX3	TNIP1	g.IVS16-196C>T		A	G	0.2771	0.6736	0.3449	0.3956
rs11780345	Analyzed	8	23107911	TNFRSF10B/TNFRSF10C/TNFRSF10D/TNFRSF10A	TNFRSF10A	g.IVS9-2440A>G		C	T	0.1807	0.1677	0.379	0.3957
rs740002	Analyzed	5	135273676	IL9	IL9	g.-14271T>C		G	A	0.4268	1	0.3435	0.3958
rs379527	Analyzed	19	6627442	TNFSF14	C3	g.*1450G>T		C	A	0.4398	0.1901	0.3385	0.3986
rs999261	Analyzed	21	33588030	IL10RB	IL10RB	g.IVS6-2329A>G		G	A	0.3795	1	0.357	0.4005
rs11883987	Analyzed	2	102127672	IL1R1	IL1R1	g.-12944C>T		C	T	0.3373	0.7208	0.382	0.4016
rs3784782	Analyzed	15	89103252	BLM	BLM	g.IVS5-1129C>G		G	C	0.1747	1	0.3418	0.4019
rs11654088	Analyzed	17	16790538	TNFRSF13B	TNFRSF13B	g.IVS3+2239C>G		C	G	0.3253	1	0.3755	0.402
rs301275	Analyzed	5	82598817	XRCC4	XRCC4	g.IVS7+8565A>T		A	T	0.1566	0.5945	0.357	0.4032
rs7518045	Analyzed	1	171430135	TNFSF4	TNFSF4	g.IVS1-5804T>C		G	A	0.06627	0.2431	0.3283	0.4052
rs2859234	Analyzed	1	170885754	FASLG	FASLG	g.-9210C>T		T	C	0.3434	0.7432	0.3526	0.4077
rs700636	Analyzed	2	201861497	CASP10/CASP8	CASP8	g.*1934A>C		C	A	0.4328	0.4896	0.3706	0.4083
rs3731714	Analyzed	2	201769065	CASP10/CASP8	CASP10	g.IVS5+149C>T		T	C	0.1566	0.5945	0.357	0.4084
rs3213266	Analyzed	19	48767476	XRCC1	XRCC1	g.IVS2+3426C>T		A	G	0.1687	1	0.3686	0.4087
rs3751987	Analyzed	17	16777150	TNFRSF13B	LOC96597	g.-498C>T		A	G	0.3563	0.1502	0.3572	0.409
rs4987768	Analyzed	18	59055497	BCL2	BCL2	g.IVS2+80670G>T		A	C	0.2952	0.2944	0.3414	0.4091
rs747825	Analyzed	3	161182213	IL12A	IL12A	g.-7324T>G		T	G	0.1446	1	0.3438	0.4094
rs1181390	Analyzed	2	204280922	CD28	CD28	g.IVS1+1206G>T		G	T	0.4759	0.1248	0.3549	0.41
rs3782723	Analyzed	12	6336316	TNFRSF1A/LTBR/TNFRSF7	SCNN1A	g.IVS4-1009C>G		C	G	0.3494	1	0.3881	0.4114
rs750781	Analyzed	11	33874042	LMO2	LMO2	g.-26533A>T		A	T	0.3253	0.45	0.3755	0.4136
rs1880030	Analyzed	12	120968923	BCL7A	BCL7A	g.IVS4+2581G>A		A	G	0.4096	0.02656	0.2818	0.4141
rs598638	Analyzed	3	161203511	IL12A	IL12A	g.*7470G>A		A	G	0.1867	1	0.3568	0.4144
rs2855537	Analyzed	12	6769442	CD4	CD4	g.IVS1+353T>G		T	G	0.3313	1	0.3504	0.415
rs3782735	Analyzed	12	6755337	CD4	LAG3	g.IVS5+362G>A		G	A	0.4157	0.5328	0.3584	0.418
rs10234749	Analyzed	7	152018802	XRCC2	XRCC2	g.-14704C>A		T	G	0.4699	0.05873	0.2805	0.4185
rs9989529	Analyzed	18	58932357	BCL2	BCL2	g.*14480G>A		C	T	0.1084	1	0.3449	0.4193
rs8096380	Analyzed	18	59071461	BCL2	BCL2	g.IVS2+64706C>T		G	A	0.3193	0.004965	0.2895	0.4204
rs9807663	Analyzed	18	59070310	BCL2	BCL2	g.IVS2+65857T>A		A	T	0.3193	0.004965	0.2895	0.4204
rs1805419	Analyzed	19	54150916	BAX	BAX	g.IVS3+14A>G		A	G	0.3373	0.4596	0.382	0.4208
rs861547	Analyzed	14	103225070	XRCC3	KNS2	g.IVS16+1769C>T		T	C	0.4096	0.7432	0.4135	0.4213
rs4297265	Analyzed	1	67624923	IL12RB2	IL12RB2	g.Ex14-18G>A	p.T643T	A	G	0.3494	0.1683	0.3881	0.4215
rs10831225	Analyzed	11	93785825	MRE11A	MRE11A	g.*7113T>G		A	C	0.4337	0.3515	0.4215	0.4228
rs16900429	Analyzed	8	90845430	RIPK2	RIPK2	g.IVS2+1083T>C		C	T	0.1687	0.6265	0.3686	0.4234
rs9658761	Analyzed	10	90759866	FAS	FAS	g.IVS4-410G>T		T	G	0.07831	0.3137	0.3618	0.4235
rs3181163	Analyzed	19	15027162	CASP14	CASP14	g.IVS4+77T>C		C	T	0.1159	0.1339	0.398	0.4237
rs4871846	Analyzed	8	23011252	TNFRSF10B/TNFRSF10C/TNFRSF10D/TNFRSF10A	TNFRSF10C	g.-5327C>G		C	G	0.2892	0.406	0.3533	0.4267
rs1061631	Analyzed	1	12191086	TNFRSF8/TNFRSF1B	TNFRSF1B	g.Ex10-779G>A		A	G	0.1084	1	0.3449	0.4273
rs12042105	Analyzed	1	12027635	TNFRSF8/TNFRSF1B	RP5-1077B9.4	g.*13182C>T		T	C	0.378	1	0.3746	0.43
rs6131012	Analyzed	20	44162068	CD40	RPL13P2	g.NC_-154A>G		A	G	0.3373	0.4596	0.382	0.4311
rs17757541	Analyzed	18	59030666	BCL2	BCL2	g.IVS2-83694G>C		G	C	0.1687	0.6265	0.3686	0.4322
rs331457	Analyzed	11	36480188	TRAF6/RAG1/RAG2	TRAF6	g.IVS1-251G>A		T	C	0.07831	1	0.3618	0.4336
rs8110862	Analyzed	19	15004208	CASP14	FLJ40365	g.*9276A>C		C	A	0.4329	0.02692	0.4307	0.4343
rs1224163	Analyzed	13	107763060	LIG4/TNFSF13B	TNFSF13B	g.*5772G>T		T	G	0.1446	0.3107	0.3438	0.435
rs12693932	Analyzed	2	201801640	CASP10/CASP8	CASP10	g.IVS11-261T>C		C	T	0.1807	1	0.379	0.436
rs206079	Analyzed	13	31818618	BRCA2	BRCA2	g.IVS12-346G>A		A	G	0.4277	1	0.3583	0.4364
rs344550	Analyzed	19	6633953	TNFSF14	C3	g.IVS33-713G>C		C	G	0.4458	1	0.425	0.4372
rs1622182	Analyzed	11	129235305	NFRKB	TMEM45B	g.*1514C>T		C	T	0.09639	1	0.3167	0.4377
rs11582424	Analyzed	1	152630609	IL6R	IL6R	g.-14120A>C		C	A	0.1687	0.6265	0.3686	0.4393
rs12603708	Analyzed	17	16787838	TNFRSF13B	TNFRSF13B	g.IVS3-3288C>T		G	A	0.2654	0.1251	0.4265	0.4396
rs3758642	Analyzed	11	33872467	LMO2	LMO2	g.-24958T>C		G	A	0.3614	1	0.3939	0.44
rs3751991	Analyzed	17	16776011	TNFRSF13B	LOC96597	g.IVS2+199G>T		A	C	0.3494	0.1683	0.3881	0.4407
rs2239347	Analyzed	16	27266522	IL4R	IL4R	g.IVS6+1082A>C		A	C	0.4819	0.7537	0.434	0.4413
rs2364480	Analyzed	12	6365536	TNFRSF1A/LTBR/TNFRSF7	LTBR	g.Ex5+44C>A	p.A172A	C	A	0.1235	1	0.37	0.4414
rs1882928	Analyzed	8	31143364	WRN	WRN	g.IVS33-716A>G		A	G	0.3795	0.747	0.357	0.4417
rs2562754	Analyzed	15	78042264	BCL2A1	BCL2A1	g.IVS1-1693G>A		C	T	0.3795	1	0.357	0.4419
rs2227973	Analyzed	11	36553889	TRAF6/RAG1/RAG2	RAG1	g.Ex2+2473A>G	p.K820R	A	G	0.3795	1	0.357	0.4441
rs664673	Analyzed	1	7892662	TNFRSF9	TNFRSF9	g.*10819G>A		C	T	0.1205	1	0.3701	0.4454
rs401549	Analyzed	15	89157508	BLM	BLM	g.IVS21-1828T>C		T	C	0.4217	1	0.4176	0.4456
rs11135693	Analyzed	8	22981099	TNFRSF10B/TNFRSF10C/TNFRSF10D/TNFRSF10A	TNFRSF10B	g.IVS1+1110T>G		A	C	0.1145	1	0.4311	0.4458
rs1832123	Analyzed	1	100940784	VCAM1	VCAM1	g.-17220G>A		G	A	0.4096	1	0.4135	0.446
rs2986749	Analyzed	1	6466594	TNFRSF25	PLEKHG5	g.IVS3-6289T>C		G	A	0.2988	0.6943	0.3937	0.4485
rs2041693	Analyzed	3	173698269	TNFSF10	TNFSF10	g.*8706A>G		T	C	0.4321	0.5232	0.4404	0.4508
rs1058867	Analyzed	21	33591251	IL10RB	IL10RB	g.Ex7-140G>A		G	A	0.3072	0.1319	0.4606	0.4518
rs2058194	Analyzed	17	59374080	CD79B	SCN4A	g.Ex23+109A>G	p.N1376D	C	T	0.5	0.5305	0.3516	0.452
rs2398	Analyzed	15	50194701	BCL2L10	BCL2L10	g.-2485G>A		C	T	0.1867	1	0.3568	0.4522
rs2364493	Analyzed	12	6415792	TNFRSF1A/LTBR/TNFRSF7	LOC390284	g.NC_-2137A>G		A	G	0.2439	0.1222	0.3655	0.4554
rs12817967	Analyzed	12	6416255	TNFRSF1A/LTBR/TNFRSF7	LOC390284	g.NC_-1674A>C		C	A	0.3554	0.7422	0.3544	0.4578
rs4469949	Analyzed	12	6415872	TNFRSF1A/LTBR/TNFRSF7	LOC390284	g.NC_-2057A>G		A	G	0.3554	0.7422	0.3544	0.4578
rs10181869	Analyzed	2	102168284	IL1R1	IL1RL2	g.-2475C>A		A	C	0.494	0.2086	0.4365	0.4594
rs4851531	Analyzed	2	102015041	IL1R2	IL1R2	g.*3754C>T		C	T	0.4699	0.5301	0.4313	0.461
rs3732179	Analyzed	2	61007829	REL	REL	g.*4654T>C		C	T	0.1687	0.02631	0.3686	0.4637
rs4521758	Analyzed	8	48904123	PRKDC	PRKDC	g.IVS61-662G>A		T	C	0.1084	0.2431	0.3449	0.4641
rs1542578	Analyzed	18	58965895	BCL2	BCL2	g.IVS2-18923T>G		A	C	0.3855	0.514	0.4043	0.4644
rs7250423	Analyzed	19	17819617	JAK3	JAK3	g.IVS1+138G>A		T	C	0.2407	1	0.4063	0.4664
rs6509177	Analyzed	19	50221846	RELB	RELB	g.IVS7+1011A>G		G	A	0.4699	1	0.4313	0.4666
rs2295464	Analyzed	1	46498528	RAD54L	RAD54L	g.IVS5+170G>A		A	G	0.259	0.6573	0.4271	0.4677
rs1035140	Analyzed	2	201860736	CASP10/CASP8	CASP8	g.*1173A>T		A	T	0.4699	0.5301	0.4313	0.4679
rs11679181	Analyzed	2	201870583	CASP10/CASP8	ALS2CR12	g.IVS11+1623G>A		T	C	0.4699	0.5301	0.4313	0.4679
rs7076748	Analyzed	10	104140132	NFKB2	NFKB2	g.-5574C>G		C	G	0.4819	0.7537	0.434	0.4711
rs8178071	Analyzed	8	48977140	PRKDC	PRKDC	g.IVS27+542G>A		T	C	0.1145	0.5379	0.4311	0.4721
rs13150331	Analyzed	4	154819072	TLR2	TLR2	g.-24437A>G		G	A	0.4878	0.7582	0.5269	0.4732
rs206111	Analyzed	13	31782771	BRCA2	BRCA2	g.-5826T>C		C	T	0.4819	0.3459	0.434	0.4734
rs1003918	Analyzed	17	30356290	LIG3	LIG3	g.*651A>G		A	G	0.241	0.4306	0.416	0.4738
rs2230365	Analyzed	6	31633427	LTA/TNF	NFKBIL1	g.Ex3+44C>T	p.S126S	T	C	0.1145	0.5379	0.4311	0.4738
rs12938073	Analyzed	17	16786901	TNFRSF13B	TNFRSF13B	g.IVS3-2351A>T		T	A	0.1506	0.5733	0.4737	0.4773
rs11242867	Analyzed	6	360406	IRF4	IRF4	g.*7807A>G		A	G	0.2349	0.1677	0.4069	0.4783
rs3861953	Analyzed	1	171447011	TNFSF4	TNFSF4	g.-4072G>A		T	C	0.1145	0.5379	0.4311	0.4808
rs4787426	Analyzed	16	27292232	IL4R	IL4R	g.*9579G>T		G	T	0.1566	1	0.4311	0.4814
rs218932	Analyzed	8	90822075	RIPK2	RIPK2	g.-17348A>G		A	G	0.2289	0.7008	0.4102	0.4826
rs3024622	Analyzed	16	27272954	IL4R	IL4R	g.IVS7-888C>G		C	G	0.4878	0.7582	0.5269	0.4844
rs10200844	Analyzed	2	24146867	TP53I3	SF3B14	g.IVS2-2034T>G		C	A	0.1325	1	0.3925	0.4851
rs11899004	Analyzed	2	201822271	CASP10/CASP8	CASP8	g.IVS2-8753G>A		A	G	0.241	1	0.416	0.4851
rs11855560	Analyzed	15	38811595	RAD51	RAD51	g.Ex10-52T>C		T	C	0.2169	0.0361	0.4037	0.4856
rs1148321	Analyzed	13	31872288	BRCA2	BRCA2	g.*1380A>T		T	A	0.1807	0.04504	0.379	0.4876
rs833058	Analyzed	6	43839832	VEGF	VEGF	g.-6589C>T		C	T	0.2289	0.406	0.4102	0.4878
rs2302365	Analyzed	12	6754505	CD4	LAG3	g.IVS4-195G>A		A	G	0.08824	1	0.4767	0.489
rs12131065	Analyzed	1	67541594	IL12RB2	IL12RB2	g.-17045G>A		A	G	0.3675	0.3088	0.4923	0.491
rs1224096	Analyzed	13	107701073	LIG4/TNFSF13B	TNFSF13B	g.-19171A>G		A	G	0.4024	0.7474	0.4844	0.4918
rs11785599	Analyzed	8	22948219	TNFRSF10B/TNFRSF10C/TNFRSF10D/TNFRSF10A	TNFRSF10B	g.IVS2-3889A>G		C	T	0.4691	0.3478	0.4481	0.493
rs4743	Analyzed	13	102291826	ERCC5	BIVM	g.Ex11-57C>G		G	C	0.1446	1	0.4128	0.4939
rs3758638	Analyzed	11	33856532	LMO2	LMO2	g.IVS2+3414G>T		A	C	0.3434	1	0.4808	0.4943
rs2239707	Analyzed	6	31633298	LTA/TNF	NFKBIL1	g.IVS2-86C>T		C	T	0.1728	0.6265	0.4476	0.4944
rs4150355	Analyzed	13	102321313	ERCC5	ERCC5	g.IVS12-1236C>T		T	C	0.1446	1	0.4128	0.4989
rs11242865	Analyzed	6	356954	IRF4	IRF4	g.*4355C>T		T	C	0.1265	1	0.4475	0.4989
rs9314259	Analyzed	8	22996545	TNFRSF10B/TNFRSF10C/TNFRSF10D/TNFRSF10A	TNFRSF10B	g.-14192T>C		G	A	0.4328	0.4756	0.5526	0.5003
rs10242595	Analyzed	7	22740756	IL6	IL6	g.*3038A>G		G	A	0.1037	1	0.4422	0.5013
rs10171839	Analyzed	2	218759559	IL8RB/IL8RA	IL8RA	g.-21379T>C		G	A	0.4277	1	0.5155	0.502
rs17124345	Analyzed	1	85498691	BCL10	C1orf52	g.-786G>A		T	C	0.259	0.4153	0.4271	0.5024
rs1523475	Analyzed	3	188926904	BCL6	BCL6	g.IVS8+309A>G		T	C	0.1265	0.1799	0.4475	0.5035
rs485497	Analyzed	3	161201826	IL12A	IL12A	g.*5785A>G		G	A	0.1988	0.163	0.5087	0.504
rs10849446	Analyzed	12	6349553	TNFRSF1A/LTBR/TNFRSF7	SCNN1A	g.IVS2+4242T>G		C	A	0.1325	0.3879	0.3925	0.506
rs1224177	Analyzed	13	107711357	LIG4/TNFSF13B	TNFSF13B	g.-8887G>T		T	G	0.3015	0.6651	0.4782	0.5067
rs11536889	Analyzed	9	119517952	TLR4	TLR4	g.*1204C>G		C	G	0.1829	1	0.4191	0.5081
rs4733550	Analyzed	8	128832344	MYC	MYC	g.*9957A>T		T	A	0.3494	0.7432	0.4443	0.5096
rs8086404	Analyzed	18	59068104	BCL2	BCL2	g.IVS2+68063C>G		G	C	0.4217	0.01956	0.4176	0.5114
rs9972996	Analyzed	18	59072870	BCL2	BCL2	g.IVS2+63297T>C		A	G	0.4217	0.01956	0.4176	0.5114
rs12744565	Analyzed	1	85512366	BCL10	BCL10	g.IVS2+2201T>C		G	A	0.2711	0.2053	0.4363	0.5119
rs1159120	Analyzed	10	90749672	FAS	FAS	g.IVS1-3094C>T		T	C	0.4398	1	0.5193	0.5122
rs1818545	Analyzed	11	36568666	TRAF6/RAG1/RAG2	RAG2	g.*2044G>A		C	T	0.3373	1	0.4428	0.5134
rs12869406	Analyzed	13	107684951	LIG4/TNFSF13B	C13orf6	g.*4369A>T		T	A	0.1024	0.08605	0.4119	0.5136
rs4343329	Analyzed	17	16781614	TNFRSF13B	TNFRSF13B	g.*1971G>C		C	G	0.1627	0.3121	0.4843	0.5151
rs3814231	Analyzed	10	115471008	CASP7	CASP7	g.IVS5+91C>T		T	C	0.3675	0.736	0.4923	0.5156
rs4924500	Analyzed	15	38803043	RAD51	RAD51	g.IVS6+4654A>G		A	G	0.3373	1	0.4428	0.5161
rs2241063	Analyzed	3	173712565	TNFSF10	TNFSF10	g.IVS2-422C>A		T	G	0.3476	0.1727	0.4714	0.5167
rs3764874	Analyzed	12	6328535	TNFRSF1A/LTBR/TNFRSF7	SCNN1A	g.IVS10+56C>G		C	G	0.1205	0.3137	0.3701	0.5191
rs2075685	Analyzed	5	82408421	XRCC4	XRCC4	g.-28073T>G		T	G	0.1386	1	0.4616	0.5194
rs6496724	Analyzed	15	89090734	BLM	BLM	g.IVS1-889A>C		C	A	0.3193	1	0.4677	0.5197
rs1800893	Analyzed	1	205013790	IL10/IL19	IL10	g.-1386A>G		T	C	0.06627	1	0.3709	0.5201
rs4242390	Analyzed	8	23041344	TNFRSF10B/TNFRSF10C/TNFRSF10D/TNFRSF10A	TNFRSF10D	g.*9983G>A		T	C	0.2439	1	0.467	0.5208
rs2639614	Analyzed	1	170892580	FASLG	FASLG	g.-2384T>C		T	C	0.1506	1	0.4737	0.5215
rs11811788	Analyzed	1	171417350	TNFSF4	TNFSF4	g.*4927G>C		G	C	0.06024	1	0.4891	0.5216
rs28365048	Analyzed	19	50546759	ERCC2/ERCC1	ERCC2	g.Ex23+61A>C	p.K751Q	G	T	0.06024	1	0.4891	0.5254
rs6949149	Analyzed	7	22715682	IL6	IL6	g.-17724G>T		G	T	0.4458	0.5392	0.4449	0.5259
rs4987721	Analyzed	18	59105043	BCL2	BCL2	g.IVS2+31124A>G		C	T	0.1566	0.5379	0.4311	0.5264
rs3181309	Analyzed	19	15028795	CASP14	CASP14	g.*894C>T		C	T	0.3193	0.7121	0.4677	0.5295
rs1567868	Analyzed	2	218734864	IL8RB/IL8RA	IL8RA	g.*2262T>C		G	A	0.06627	1	0.3709	0.5296
rs800138	Analyzed	11	2352867	CD81	CD81	g.-2488A>C		C	A	0.4639	1	0.5262	0.5309
rs3176860	Analyzed	1	100959807	VCAM1	VCAM1	g.IVS2+912A>G		G	A	0.3675	1	0.4923	0.5329
rs11569359	Analyzed	12	6423865	TNFRSF1A/LTBR/TNFRSF7	TNFRSF7	g.-657C>G		G	C	0.3373	0.7415	0.4428	0.5334
rs1492907	Analyzed	1	170908741	FASLG	FASLG	g.*6961T>C		T	C	0.1747	1	0.4935	0.5338
rs2551408	Analyzed	18	59152902	BCL2	FVT1	g.IVS9+568A>T		A	T	0.2952	0.1146	0.453	0.5339
rs389480	Analyzed	15	89152934	BLM	BLM	g.IVS19-437G>A		G	A	0.3434	0.1683	0.4808	0.5339
rs508760	Analyzed	11	104429161	CASP4/CASP5/CASP1	LOC440067	g.*12353A>C		T	G	0.1386	0.2413	0.4616	0.5352
rs13234992	Analyzed	7	152019911	XRCC2	XRCC2	g.-15813G>A		C	T	0.4578	0.76	0.4438	0.5371
rs3777018	Analyzed	5	82662675	XRCC4	XRCC4	g.IVS7-22025A>G		A	G	0.4578	0.76	0.4438	0.5377
rs3785568	Analyzed	17	59377523	CD79B	SCN4A	g.IVS18+614A>G		C	T	0.1103	0.2198	0.4835	0.5399
rs800160	Analyzed	11	2336710	CD81	CD81	g.-18645C>T		C	T	0.3313	0.4596	0.4744	0.5405
rs4787423	Analyzed	16	27274835	IL4R	IL4R	g.IVS9+106C>T		C	T	0.1037	1	0.4422	0.5406
rs231983	Analyzed	3	173719134	TNFSF10	TNFSF10	g.IVS1-3652A>C		T	G	0.2048	1	0.4898	0.5406
rs6541012	Analyzed	1	12035307	TNFRSF8/TNFRSF1B	TNFRSF8	g.-10935C>T		C	T	0.3976	0.754	0.4469	0.5409
rs1478483	Analyzed	5	82437062	XRCC4	XRCC4	g.IVS2+429A>G		A	G	0.07831	1	0.4114	0.541
rs4644506	Analyzed	1	12033155	TNFRSF8/TNFRSF1B	TNFRSF8	g.-13087G>C		C	G	0.3494	0.1847	0.4443	0.5411
rs816050	Analyzed	1	12164578	TNFRSF8/TNFRSF1B	TNFRSF1B	g.IVS1-6862G>A		A	G	0.07831	1	0.4114	0.5412
rs714629	Analyzed	12	8657628	AICDA	AICDA	g.-997C>G		G	C	0.07927	1	0.4379	0.5443
rs12736809	Analyzed	1	12091045	TNFRSF8/TNFRSF1B	TNFRSF8	g.IVS4-1165T>A		A	T	0.3855	0.5323	0.4467	0.5443
rs12085107	Analyzed	1	170910845	FASLG	FASLG	g.*9065A>T		T	A	0.07229	1	0.5204	0.5477
rs3765148	Analyzed	19	54139525	BAX	DHDH	g.Ex7-52G>A	p.G282R	A	G	0.09146	1	0.4164	0.5489
rs1982673	Analyzed	18	58948995	BCL2	BCL2	g.IVS2-2023T>G		C	A	0.3134	0.005356	0.6247	0.5492
rs11888	Analyzed	19	17796626	JAK3	JAK3	g.*1925G>A		T	C	0.494	1	0.4387	0.5495
rs7930377	Analyzed	11	69710476	FADD	TMEM16A	g.IVS24-1016G>A		A	G	0.2195	0.1499	0.4505	0.551
rs4872049	Analyzed	8	22987724	TNFRSF10B/TNFRSF10C/TNFRSF10D/TNFRSF10A	TNFRSF10B	g.-5371G>A		C	T	0.07831	1	0.4114	0.5533
rs10898840	Analyzed	11	69717569	FADD	TMEM16A	g.*5810C>T		T	C	0.494	0.1157	0.4387	0.5536
rs4518666	Analyzed	8	23010150	TNFRSF10B/TNFRSF10C/TNFRSF10D/TNFRSF10A	TNFRSF10C	g.-6429T>C		T	C	0.3795	0.1913	0.4975	0.5543
rs12738055	Analyzed	1	46473809	RAD54L	RAD54L	g.-12855A>T		T	A	0.4578	0.5314	0.4438	0.5558
rs10889680	Analyzed	1	67541181	IL12RB2	IL12RB2	g.-17458T>A		T	A	0.2169	1	0.5018	0.5649
rs2450254	Analyzed	11	69158965	CCND1	CCND1	g.-6297A>T		T	A	0.1098	0.4728	0.5422	0.5678
rs1207952	Analyzed	13	31875496	BRCA2	CG018	g.IVS6-159G>T		C	A	0.4699	0.7545	0.4423	0.5679
rs4787956	Analyzed	16	27285750	IL4R	IL4R	g.*3097A>G		A	G	0.4318	0.714	0.5651	0.57
rs4149570	Analyzed	12	6321851	TNFRSF1A/LTBR/TNFRSF7	TNFRSF1A	g.-609G>T		A	C	0.4146	0.113	0.5261	0.5703
rs12909161	Analyzed	15	50207783	BCL2L10	GNB5	g.IVS9-50C>A		T	G	0.1928	1	0.477	0.5729
rs7561080	Analyzed	2	113581391	IL1RN	IL1RN	g.-10675A>G		G	A	0.253	1	0.5327	0.5734
rs1859428	Analyzed	5	135279006	IL9	IL9	g.-19601A>C		G	T	0.4578	0.5314	0.4438	0.574
rs13439388	Analyzed	8	31159611	WRN	WRN	g.*9450A>G		G	A	0.3537	1	0.5136	0.5741
rs17447140	Analyzed	10	90728927	FAS	FAS	g.-11686A>T		T	A	0.2108	0.4153	0.515	0.5755
rs6690493	Analyzed	1	12058113	TNFRSF8/TNFRSF1B	TNFRSF8	g.IVS1-8995A>G		G	A	0.2108	0.1754	0.515	0.5755
rs731909	Analyzed	11	2365200	CD81	CD81	g.IVS1-3018G>C		C	G	0.4878	0.3533	0.532	0.5762
rs6531670	Analyzed	4	38511417	TLR10/TLR1/TLR6	TLR6	g.-3927G>A		C	T	0.253	0.6573	0.5327	0.5778
rs4149578	Analyzed	12	6317698	TNFRSF1A/LTBR/TNFRSF7	TNFRSF1A	g.IVS1+3505G>A		T	C	0.2169	1	0.5018	0.5825
rs441399	Analyzed	15	89167226	BLM	BLM	g.*7712G>A		G	A	0.3012	0.4623	0.5654	0.5829
rs762891	Analyzed	13	31771953	BRCA2	FRY	g.*4355G>T		T	G	0.253	0.4153	0.5327	0.5838
rs11786012	Analyzed	8	23024330	TNFRSF10B/TNFRSF10C/TNFRSF10D/TNFRSF10A	TNFRSF10C	g.IVS1-848T>C		C	T	0.2892	0.6943	0.558	0.5841
rs10866820	Analyzed	8	23033115	TNFRSF10B/TNFRSF10C/TNFRSF10D/TNFRSF10A	TNFRSF10C	g.*2625A>G		G	A	0.2771	0.2448	0.5501	0.5851
rs189368	Analyzed	19	6558409	TNFSF7	TNFSF7	g.-16395T>A		A	T	0.1402	0.4634	0.4999	0.5865
rs4987827	Analyzed	18	58957878	BCL2	BCL2	g.IVS2-10906C>A		T	G	0.1951	0.323	0.5257	0.5879
rs6684874	Analyzed	1	209598683	TRAF5	TRAF5	g.IVS6-1194A>T		A	T	0.3494	1	0.591	0.5879
rs2235126	Analyzed	8	23113126	TNFRSF10B/TNFRSF10C/TNFRSF10D/TNFRSF10A	TNFRSF10A	g.IVS7+218G>A		C	T	0.259	0.6967	0.5331	0.5881
rs16900343	Analyzed	5	82677893	XRCC4	XRCC4	g.IVS7-6807T>C		C	T	0.2	0.3846	0.4642	0.5888
rs348373	Analyzed	19	6494342	TNFSF9	TNFSF9	g.*8264C>T		T	C	0.1988	0.07248	0.5087	0.5888
rs3917010	Analyzed	1	100963454	VCAM1	VCAM1	g.IVS4+420A>C		C	A	0.2169	0.6265	0.5018	0.5921
rs39508	Analyzed	8	90864443	RIPK2	RIPK2	g.IVS7-976G>A		A	G	0.2771	0.2448	0.5501	0.5922
rs12566680	Analyzed	1	100939236	VCAM1	VCAM1	g.-18768A>G		G	A	0.2892	1	0.558	0.5928
rs2293554	Analyzed	2	201839832	CASP10/CASP8	CASP8	g.IVS5+73T>G		G	T	0.2229	0.6736	0.5204	0.5939
rs2493215	Analyzed	1	7930303	TNFRSF9	TNFRSF9	g.-7661T>C		G	A	0.372	1	0.5703	0.5944
rs10836123	Analyzed	11	33839045	LMO2	LMO2	g.IVS5-1348A>C		G	T	0.2289	0.6633	0.5128	0.5964
rs11747112	Analyzed	5	158707187	IL12B	IL12B	g.-20818G>C		G	C	0.09036	0.1782	0.4453	0.5976
rs4244437	Analyzed	5	158705695	IL12B	IL12B	g.-19326T>C		G	A	0.09036	0.1782	0.4453	0.5976
rs8181791	Analyzed	13	107732046	LIG4/TNFSF13B	TNFSF13B	g.IVS2-5106G>A		G	A	0.2892	0.2312	0.558	0.5981
rs4932364	Analyzed	15	89135734	BLM	BLM	g.IVS15+656G>A		A	G	0.08434	1	0.5447	0.6013
rs3769821	Analyzed	2	201831675	CASP10/CASP8	CASP8	g.IVS3+325C>T		C	T	0.2651	0.6736	0.5417	0.6021
rs3218984	Analyzed	2	102010893	IL1R2	IL1R2	g.IVS9-227T>C		C	T	0.2349	0.406	0.5252	0.6031
rs13296	Analyzed	6	44326098	NFKBIE	HSPCB	g.Ex6+93A>G	p.K247K	A	G	0.3614	0.736	0.5965	0.6032
rs12765241	Analyzed	10	90730481	FAS	FAS	g.-10132A>G		A	G	0.08434	0.3137	0.5447	0.6039
rs10439143	Analyzed	19	1049066	GPX4	POLR2E	g.-2751T>C		A	G	0.259	1	0.5331	0.6042
rs2532499	Analyzed	12	6433516	TNFRSF1A/LTBR/TNFRSF7	TNFRSF1A/LTBR/TNFRSF7	g.IVS3+373C>G		C	G	0.253	0.1754	0.5327	0.605
rs2236758	Analyzed	21	33547283	IFNAR2	IFNAR2	g.IVS7+278A>G		G	A	0.4639	0.3586	0.541	0.6054
rs2286721	Analyzed	12	6432326	TNFRSF1A/LTBR/TNFRSF7	TNFRSF1A/LTBR/TNFRSF7	g.IVS1-168G>A		A	G	0.241	0.07248	0.5231	0.606
rs2857605	Analyzed	6	31632830	LTA/TNF	NFKBIL1	g.IVS2-554C>T		C	T	0.1205	1	0.5931	0.6103
rs12087340	Analyzed	1	85519581	BCL10	BCL10	g.-4957G>A		T	C	0.2651	0.2053	0.5417	0.6128
rs11986055	Analyzed	8	42254335	IKBKB	IKBKB	g.IVS2+5455A>C		C	A	0.1024	1	0.4742	0.6143
rs2272733	Analyzed	8	42277059	IKBKB	IKBKB	g.IVS5-4803T>C		T	C	0.1024	1	0.4742	0.6143
rs3763511	Analyzed	8	42355015	IKBKB	DKK4	g.-1294C>T		A	G	0.1024	1	0.4742	0.6143
rs4560769	Analyzed	8	42259961	IKBKB	IKBKB	g.IVS2-5348A>G		G	A	0.1024	1	0.4742	0.6143
rs10424046	Analyzed	19	50227876	RELB	RELB	g.IVS9+29C>G		C	G	0.4634	1	0.5311	0.6146
rs1201124	Analyzed	1	12111359	TNFRSF8/TNFRSF1B	TNFRSF8	g.IVS12+2479G>C		G	C	0.4096	1	0.6156	0.6157
rs8177435	Analyzed	5	150384576	GPX3	GPX3	g.IVS1-518G>T		T	G	0.3313	1	0.5458	0.6159
rs12416109	Analyzed	10	115474650	CASP7	CASP7	g.IVS6-461G>A		G	A	0.4277	0.5328	0.5453	0.6171
rs4696187	Analyzed	4	154814328	TLR2	TLR2	g.-29181C>T		C	T	0.3795	0.3515	0.5477	0.6174
rs7775816	Analyzed	6	3002412	RIPK1	SERPINBP1	g.NC_*7946A>G		A	G	0.3133	0.7121	0.5724	0.619
rs2021840	Analyzed	1	170909843	FASLG	FASLG	g.*8063G>A		G	A	0.1084	0.4634	0.58	0.6191
rs4491070	Analyzed	1	12052638	TNFRSF8/TNFRSF1B	TNFRSF8	g.IVS1+6333C>T		C	T	0.494	1	0.6401	0.6195
rs7956804	Analyzed	12	6768721	CD4	CD4	g.-10844A>G		G	A	0.3434	1	0.5467	0.6207
rs3804100	Analyzed	4	154844859	TLR2	TLR2	g.Ex3+1366T>C	p.S450S	C	T	0.3313	0.514	0.5458	0.6211
rs2142097	Analyzed	8	91014208	NBN	NBN	g.*2777G>A		C	T	0.4036	1	0.5469	0.6211
rs16849958	Analyzed	4	74835899	IL8	IL8	g.*8853A>C		C	A	0.3253	0.7208	0.5789	0.6215
rs2725344	Analyzed	8	31037640	WRN	WRN	g.IVS3+1317A>G		G	A	0.2229	0.2053	0.5204	0.6219
rs8094315	Analyzed	18	59087027	BCL2	BCL2	g.IVS2+49140T>C		G	A	0.3373	0.4906	0.5851	0.6221
rs6870870	Analyzed	5	55330085	IL6ST	IL6ST	g.-22221T>G		A	C	0.1084	1	0.58	0.6242
rs2853694	Analyzed	5	158681666	IL12B	IL12B	g.IVS4+314C>A		G	T	0.3554	1	0.5473	0.6246
rs1944419	Analyzed	18	59075593	BCL2	BCL2	g.IVS2+60574T>A		A	T	0.3916	0.5323	0.5474	0.6249
rs7872878	Analyzed	9	116721898	TNFSF8	TNFSF8	g.IVS1-1659C>G		C	G	0.3012	0.6967	0.5654	0.625
rs9587544	Analyzed	13	107712281	LIG4/TNFSF13B	TNFSF13B	g.-7963A>G		A	G	0.1145	1	0.4993	0.6257
rs12200314	Analyzed	6	3003689	RIPK1	SERPINBP1	g.NC_*9223C>T		C	T	0.4337	0.5323	0.6237	0.6264
rs10808311	Analyzed	8	31017804	WRN	WRN	g.IVS1+6773C>T		C	T	0.4036	1	0.5469	0.6273
rs8111930	Analyzed	19	10229050	ICAM1/ICAM4/ICAM5	MRPL4	g.IVS5+549A>G		A	G	0.1084	1	0.58	0.6291
rs876430	Analyzed	13	102327285	ERCC5	ERCC5	g.*1030G>A		G	A	0.4699	1	0.6341	0.6295
rs4846100	Analyzed	1	12200251	TNFRSF8/TNFRSF1B	LOC390998	g.*3184G>C		G	C	0.259	0.6967	0.5331	0.6296
rs927375	Analyzed	9	116737768	TNFSF8	TNFSF8	g.-5363T>C		A	G	0.5	0.5392	0.5346	0.6301
rs2267966	Analyzed	12	6427453	TNFRSF1A/LTBR/TNFRSF7	TNFRSF7	g.IVS2-2147A>T		T	A	0.3554	0.7432	0.5473	0.6301
rs3024585	Analyzed	16	27267345	IL4R	IL4R	g.IVS6+1905G>A		G	A	0.3133	0.7121	0.5724	0.6303
rs7234941	Analyzed	18	59073831	BCL2	BCL2	g.IVS2+62336G>A		T	C	0.1145	0.3137	0.4993	0.6304
rs1799787	Analyzed	19	50547984	ERCC2/ERCC1	ERCC2	g.IVS19-70C>T		A	G	0.06098	1	0.514	0.6306
rs2365094	Analyzed	12	6753931	CD4	LAG3	g.IVS3-91G>C		C	G	0.4819	0.3533	0.6372	0.6308
rs2737341	Analyzed	8	31133467	WRN	WRN	g.IVS32-959T>C		T	C	0.4157	0.3436	0.5462	0.6317
rs13257094	Analyzed	8	23063123	TNFRSF10B/TNFRSF10C/TNFRSF10D/TNFRSF10A	TNFRSF10D	g.IVS2-1114C>T		A	G	0.1265	1	0.5212	0.6318
rs12506479	Analyzed	4	74811025	IL8	IL8	g.-14214C>T		T	C	0.4337	0.2107	0.6237	0.6327
rs1618536	Analyzed	19	50563446	ERCC2/ERCC1	ERCC2	g.IVS5+282A>G		T	C	0.494	1	0.6401	0.6353
rs4447608	Analyzed	2	113322428	IL1A/IL1B	IL1B	g.-12150G>A		T	C	0.4578	0.7527	0.6309	0.6368
rs12462622	Analyzed	19	17788285	JAK3	INSL3	g.*377C>A		G	T	0.2771	0.406	0.5501	0.6379
rs1466462	Analyzed	11	65175940	RELA	SIPA1	g.*1177C>G		C	G	0.1296	0.3963	0.5214	0.6381
rs9610	Analyzed	11	117377296	IL10RA	IL10RA	g.Ex7-109G>A		G	A	0.3494	0.7271	0.591	0.6396
rs4813001	Analyzed	20	44196264	CD40	CD40	g.*5177C>G		C	G	0.3434	1	0.5467	0.6399
rs144848	Analyzed	13	31804729	BRCA2	BRCA2	g.Ex10+321A>C	p.N372H	C	A	0.2349	0.009752	0.5252	0.641
rs1886087	Analyzed	13	102333829	ERCC5	LOC121952	g.IVS1+2311T>A		A	T	0.1506	1	0.5581	0.6413
rs11878644	Analyzed	19	50568807	ERCC2/ERCC1	ERCC2	g.-3168G>A		C	T	0.4759	0.7545	0.5391	0.6416
rs12454712	Analyzed	18	58996864	BCL2	BCL2	g.IVS2-49892A>G		T	C	0.4518	0.2183	0.5426	0.6426
rs3124737	Analyzed	10	115487085	CASP7	CASP7	g.*7795G>A		G	A	0.3494	0.07977	0.591	0.6447
rs1470383	Analyzed	12	67493429	MDM2	MDM2	g.IVS2-172G>A		A	G	0.3434	0.00149	0.7053	0.6447
rs4698863	Analyzed	4	103764896	NFKB1	NFKB1	g.*7365A>G		T	C	0.3313	0.1913	0.5458	0.6452
rs7037225	Analyzed	9	119523460	TLR4	TLR4	g.*6712C>T		T	C	0.1506	0.5379	0.5581	0.6457
rs2382987	Analyzed	19	17795018	JAK3	INSL3	g.-1702T>C		G	A	0.1325	0.5704	0.6041	0.6459
rs9514828	Analyzed	13	107719374	LIG4/TNFSF13B	TNFSF13B	g.-870C>T		T	C	0.4639	0.76	0.541	0.646
rs7299900	Analyzed	12	6788093	CD4	CD4	g.IVS3-5476G>A		A	G	0.3735	0.514	0.6017	0.6484
rs874627	Analyzed	12	6804561	CD4	GPR162	g.IVS2-349G>T		T	G	0.5	0.1157	0.5346	0.6487
rs7834266	Analyzed	8	22954349	TNFRSF10B/TNFRSF10C/TNFRSF10D/TNFRSF10A	TNFRSF10B	g.IVS2+2247G>A		T	C	0.3855	0.09783	0.6066	0.6496
rs1481031	Analyzed	18	59003065	BCL2	BCL2	g.IVS2-56093A>G		T	C	0.4518	1	0.5426	0.6531
rs3181225	Analyzed	5	158673201	IL12B	IL12B	g.*3069T>C		A	G	0.1627	1	0.5737	0.6543
rs1916334	Analyzed	12	120968677	BCL7A	BCL7A	g.IVS4+2335G>A		A	G	0.3614	0.486	0.5965	0.6563
rs941941	Analyzed	11	33881299	LMO2	LMO2	g.-33790A>G		T	C	0.4699	1	0.6341	0.6614
rs10982461	Analyzed	9	116741229	TNFSF8	TNFSF8	g.-8824T>G		A	C	0.4157	0.2081	0.5462	0.6617
rs6002548	Analyzed	22	40666986	TNFRSF13C	C22orf18	g.IVS5-1840A>C		G	T	0.09146	1	0.7113	0.662
rs6799313	Analyzed	3	188953064	BCL6	BCL6	g.-18888T>C		A	G	0.1687	1	0.628	0.6632
rs3790558	Analyzed	1	67549609	IL12RB2	IL12RB2	g.IVS1+3371G>T		G	T	0.439	0.5299	0.724	0.6664
rs2326173	Analyzed	6	3020552	RIPK1	RIPK1	g.-1504A>G		G	A	0.3963	0.3321	0.632	0.6666
rs17102086	Analyzed	1	46495526	RAD54L	RAD54L	g.IVS3-1419T>C		C	T	0.4639	0.2095	0.541	0.6667
rs2256507	Analyzed	19	48730146	XRCC1	ZNF575	g.IVS2-183T>C		T	C	0.1988	1	0.6128	0.6678
rs16920467	Analyzed	11	93827574	MRE11A	MRE11A	g.IVS14+1516T>A		T	A	0.08537	1	0.5762	0.6698
rs17056706	Analyzed	5	158703333	IL12B	IL12B	g.-16964G>A		T	C	0.488	0.5314	0.537	0.6699
rs3176867	Analyzed	1	100966793	VCAM1	VCAM1	g.IVS4-458C>T		T	C	0.1687	1	0.628	0.6701
rs2023614	Analyzed	19	48756705	XRCC1	XRCC1	g.IVS3+197G>C		G	C	0.1566	1	0.6213	0.6707
rs7184015	Analyzed	15	89075579	BLM	BLM	g.IVS1+13904G>T		T	G	0.494	0.1157	0.6401	0.6707
rs3176877	Analyzed	1	100975983	VCAM1	VCAM1	g.IVS8-284A>T		A	T	0.5	0.1157	0.5346	0.6728
rs2229094	Analyzed	6	31648535	LTA/TNF	LTA	g.Ex2+46T>C	p.C13R	C	T	0.1688	1	0.6235	0.6742
rs7820465	Analyzed	8	23129631	TNFRSF10B/TNFRSF10C/TNFRSF10D/TNFRSF10A	TNFRSF10A	g.IVS1-3961C>T		G	A	0.372	0.5235	0.6279	0.6746
rs4807874	Analyzed	19	6467492	TNFSF9	TUBB4	g.-14268T>C		G	A	0.3232	0.2788	0.6164	0.6796
rs1523465	Analyzed	3	188912202	BCL6	BCL6	g.*10737A>C		T	G	0.1687	0.5945	0.628	0.6797
rs842640	Analyzed	2	60949009	REL	REL	g.-13470C>G		C	G	0.1446	0.2413	0.6134	0.6813
rs4873772	Analyzed	8	49021486	PRKDC	PRKDC	g.IVS7-2344T>C		A	G	0.1687	0.5945	0.628	0.6819
rs344586	Analyzed	19	6539231	TNFSF7	TNFSF7	g.IVS2-1815G>C		C	G	0.1928	0.6633	0.6388	0.6847
rs11085177	Analyzed	19	6471490	TNFSF9	TNFSF9	g.-10557A>G		G	A	0.3537	0.4775	0.6727	0.6854
rs2073362	Analyzed	21	33542671	IFNAR2	IFNAR2	g.IVS5-213A>G		G	A	0.2134	1	0.6824	0.686
rs414634	Analyzed	15	89157257	BLM	BLM	g.IVS21+1617A>C		A	C	0.1747	0.2413	0.5879	0.6872
rs4871854	Analyzed	8	23097027	TNFRSF10B/TNFRSF10C/TNFRSF10D/TNFRSF10A	TNFRSF10A	g.*8124A>C		T	G	0.2169	1	0.6467	0.6885
rs11739800	Analyzed	5	135268712	IL9	IL9	g.-9307C>A		G	T	0.2048	0.6537	0.643	0.6896
rs4803823	Analyzed	19	50638239	ERCC2/ERCC1	ERCC1	g.-19766G>A		T	C	0.2651	0.01775	0.6563	0.6897
rs543304	Analyzed	13	31810299	BRCA2	BRCA2	g.Ex11+1898T>C	p.V1269V	C	T	0.1928	1	0.6388	0.6906
rs2149356	Analyzed	9	119514020	TLR4	TLR4	g.IVS3-468T>G		T	G	0.3963	0.5323	0.632	0.693
rs344548	Analyzed	19	6636817	TNFSF14	C3	g.IVS29+318C>G		G	C	0.06098	1	0.514	0.6969
rs6131014	Analyzed	20	44170790	CD40	CD40	g.-9599C>T		C	T	0.3476	1	0.6228	0.6976
rs382410	Analyzed	19	18029674	IL12RB1	IL12RB1	g.*1743T>C		G	A	0.3963	0.5323	0.632	0.7004
rs592483	Analyzed	11	69154354	CCND1	CCND1	g.-10908C>T		T	C	0.1747	1	0.5879	0.7012
rs11721	Analyzed	1	1142494	SDF4	SDF4	g.Ex7-344G>T		A	C	0.2099	1	0.6406	0.705
rs8113762	Analyzed	19	48786917	XRCC1	IRGQ	g.*1100T>C		G	A	0.4639	0.01135	0.747	0.705
rs17041883	Analyzed	2	111626213	BCL2L11	BCL2L11	g.IVS5-1615C>A		A	C	0.2229	0.6633	0.6338	0.7073
rs17042888	Analyzed	2	113578644	IL1RN	IL1RN	g.-13422A>G		A	G	0.247	1	0.652	0.7088
rs2725385	Analyzed	8	31047688	WRN	WRN	g.IVS7+2303T>C		T	C	0.1627	0.1799	0.5737	0.709
rs4268128	Analyzed	8	22993801	TNFRSF10B/TNFRSF10C/TNFRSF10D/TNFRSF10A	TNFRSF10B	g.-11448C>T		G	A	0.1566	0.3107	0.6213	0.7099
rs7230970	Analyzed	18	58972056	BCL2	BCL2	g.IVS2-25084A>G		C	T	0.2048	1	0.643	0.71
rs2637988	Analyzed	2	113593250	IL1RN	IL1RN	g.IVS1-864G>A		A	G	0.3133	0.4815	0.6603	0.7105
rs2007960	Analyzed	14	34952686	NFKBIA	NFKBIA	g.-9084T>A		A	T	0.2831	0.2312	0.675	0.7121
rs3790567	Analyzed	1	67594965	IL12RB2	IL12RB2	g.IVS9+5605A>G		A	G	0.2048	1	0.643	0.7129
rs883429	Analyzed	8	22942763	TNFRSF10B/TNFRSF10C/TNFRSF10D/TNFRSF10A	TNFRSF10B	g.IVS4+305G>A		T	C	0.3253	1	0.6605	0.7157
rs206340	Analyzed	13	31863310	BRCA2	BRCA2	g.IVS24-3516G>A		A	G	0.253	0.6943	0.6546	0.7161
rs7957426	Analyzed	12	6786167	CD4	CD4	g.IVS3+6269G>A		A	G	0.2651	1	0.6563	0.7181
rs4833248	Analyzed	4	123599855	IL2	IL2	g.-2809T>C		A	G	0.3133	1	0.6603	0.7189
rs707141	Analyzed	5	150366391	GPX3	GPX3	g.-14017G>A		G	A	0.3193	0.7208	0.6942	0.7195
rs2015230	Analyzed	8	31040327	WRN	WRN	g.IVS3-1020C>T		C	T	0.2229	1	0.6338	0.7205
rs4880073	Analyzed	9	138937174	TRAF2	TRAF2	g.IVS9-951G>A		A	G	0.3182	1	0.7086	0.7236
rs3738199	Analyzed	1	209611967	TRAF5	TRAF5	g.IVS12-126A>G		G	A	0.3795	0.5008	0.72	0.7241
rs10932017	Analyzed	2	204286150	CD28	CD28	g.IVS1+6434C>T		T	C	0.253	0.6943	0.6546	0.7267
rs3116482	Analyzed	2	204262002	CD28	CD28	g.-17662A>T		T	A	0.3614	0.3239	0.66	0.7271
rs540819	Analyzed	11	104371671	CASP4/CASP5/CASP1	CASP5	g.IVS8+6T>A		A	T	0.4337	0.5328	0.6534	0.7283
rs12075255	Analyzed	1	205028251	IL10/IL19	IL19	g.-10611G>A		A	G	0.2771	1	0.6578	0.7286
rs12565617	Analyzed	1	205029260	IL10/IL19	IL19	g.-9602A>T		T	A	0.2771	1	0.6578	0.7286
rs885334	Analyzed	1	205029039	IL10/IL19	IL19	g.-9823T>C		C	T	0.2771	1	0.6578	0.7286
rs17042407	Analyzed	2	113275385	IL1A/IL1B	IL1A	g.-17566G>A		C	T	0.2349	0.3651	0.6432	0.729
rs2070834	Analyzed	17	38495811	BRCA1	BRCA1	g.IVS13+676A>C		G	T	0.2349	0.6537	0.6432	0.73
rs8176257	Analyzed	17	38469731	BRCA1	BRCA1	g.IVS18-237C>A		T	G	0.2349	0.6537	0.6432	0.73
rs6032661	Analyzed	20	44167218	CD40	RPL13P2	g.NC_*4996A>G		G	A	0.2988	0.7166	0.708	0.73
rs7805828	Analyzed	7	22725087	IL6	IL6	g.-8319A>G		A	G	0.241	0.7008	0.6524	0.7306
rs7939734	Analyzed	11	69732593	FADD	FADD	g.*2365A>T		T	A	0.3554	0.3088	0.7105	0.7306
rs6693365	Analyzed	1	85522303	BCL10	BCL10	g.-7679G>C		C	G	0.3133	1	0.6603	0.7316
rs2834164	Analyzed	21	33543818	IFNAR2	IFNAR2	g.IVS6+789A>C		C	A	0.4578	0.5392	0.6496	0.732
rs2448490	Analyzed	11	65168611	RELA	SIPA1	g.IVS5-391G>A		A	G	0.253	0.1146	0.6546	0.7329
rs4075015	Analyzed	1	152655820	IL6R	IL6R	g.IVS1+11006A>T		T	A	0.4337	0.2109	0.6534	0.7337
rs1535043	Analyzed	20	44201131	CD40	CD40	g.*10044A>T		T	A	0.3072	0.45	0.6882	0.7355
rs11214108	Analyzed	11	111548824	IL18	TEX12	g.*974A>G		A	G	0.3675	0.7314	0.7154	0.7362
rs7671458	Analyzed	4	142846911	IL15	IL15	g.IVS2-12839T>G		G	T	0.06024	1	0.5398	0.7364
rs4934433	Analyzed	10	90730933	FAS	FAS	g.-9680A>C		C	A	0.4518	0.7527	0.7437	0.7369
rs1005099	Analyzed	3	188923200	BCL6	BCL6	g.IVS10-117G>T		C	A	0.3012	0.4906	0.6597	0.7375
rs6557609	Analyzed	8	22937797	TNFRSF10B/TNFRSF10C/TNFRSF10D/TNFRSF10A	TNFRSF10B	g.IVS7-79A>G		T	C	0.07353	0.09158	0.575	0.7378
rs735482	Analyzed	19	50603842	ERCC2/ERCC1	ERCC1	g.*930T>G		C	A	0.4759	0.7574	0.7502	0.7381
rs1555457	Analyzed	9	116714141	TNFSF8	TNFSF8	g.IVS2+6056G>A		T	C	0.2711	0.406	0.6678	0.7383
rs10041617	Analyzed	5	82428110	XRCC4	XRCC4	g.IVS1-8375C>T		C	T	0.3232	0.4775	0.7018	0.7383
rs4661636	Analyzed	1	15695648	CASP9	CASP9	g.IVS6-1114G>A		T	C	0.06024	1	0.5398	0.7386
rs17129789	Analyzed	1	67563186	IL12RB2	IL12RB2	g.IVS3-1820T>C		C	T	0.05422	1	0.704	0.739
rs3093032	Analyzed	19	10257336	ICAM1/ICAM4/ICAM5	ICAM1	g.Ex7+546C>T		T	C	0.05422	1	0.704	0.7396
rs949037	Analyzed	18	59129993	BCL2	BCL2	g.IVS2+6174C>T		A	G	0.4217	0.3436	0.6549	0.7401
rs2854184	Analyzed	17	59351725	CD79B	GH1	g.-1856A>T		A	T	0.3976	0.747	0.6575	0.7402
rs10887876	Analyzed	10	90735110	FAS	FAS	g.-5503C>T		T	C	0.4277	1	0.7365	0.7404
rs1234313	Analyzed	1	171432870	TNFSF4	TNFSF4	g.IVS1-8539T>C		G	A	0.3494	1	0.6604	0.7409
rs2205960	Analyzed	1	171458098	TNFSF4	TNFSF4	g.-15159C>A		T	G	0.2771	0.2681	0.6578	0.7414
rs3218911	Analyzed	2	101999779	IL1R2	IL1R2	g.IVS5+834A>G		G	A	0.3494	0.7415	0.6604	0.7418
rs2070720	Analyzed	17	59372505	CD79B	SCN4A	g.Ex24+581A>G	p.T1623T	C	T	0.4036	0.5235	0.7287	0.7424
rs3746821	Analyzed	20	44188518	CD40	CD40	g.IVS5-168G>T		T	G	0.2892	0.7208	0.6589	0.7438
rs4601580	Analyzed	1	152661041	IL6R	IL6R	g.IVS1-7255T>A		T	A	0.4578	0.5392	0.6496	0.7439
rs3787016	Analyzed	19	1041803	GPX4	POLR2E	g.IVS4+104T>C		G	A	0.4753	0.3586	0.7471	0.7442
rs4149577	Analyzed	12	6317783	TNFRSF1A/LTBR/TNFRSF7	TNFRSF1A	g.IVS1+3420C>T		A	G	0.4157	0.3515	0.7327	0.7444
rs6966	Analyzed	19	50574802	ERCC2/ERCC1	PPP1R13L	g.Ex13-67A>T		A	T	0.4451	0.7582	0.6621	0.745
rs6999227	Analyzed	8	91022515	NBN	NBN	g.IVS15+2142C>G		C	G	0.3976	0.747	0.6575	0.746
rs238415	Analyzed	19	50549075	ERCC2/ERCC1	ERCC2	g.IVS17-643G>C		G	C	0.4817	1	0.6473	0.7463
rs1474326	Analyzed	3	188925221	BCL6	BCL6	g.IVS10+202G>T		C	A	0.4217	0.7527	0.6549	0.7464
rs17000211	Analyzed	19	10230086	ICAM1/ICAM4/ICAM5	MRPL4	g.IVS6-3C>T		T	C	0.1111	1	0.6567	0.7466
rs8548	Analyzed	14	103269333	XRCC3	ZFYVE21	g.Ex7+261A>C		C	A	0.3373	0.514	0.6606	0.7467
rs12564159	Analyzed	1	67603882	IL12RB2	IL12RB2	g.IVS9-2214G>C		G	C	0.4458	0.5305	0.6516	0.747
rs3790569	Analyzed	1	67609448	IL12RB2	IL12RB2	g.IVS10-1259T>C		C	T	0.4458	0.5305	0.6516	0.747
rs2761367	Analyzed	13	31877647	BRCA2	CG018	g.IVS5-1113A>C		T	G	0.2289	0.2053	0.6498	0.7474
rs2518967	Analyzed	15	89112021	BLM	BLM	g.IVS10+764C>T		T	C	0.4639	0.05936	0.747	0.7474
rs5743794	Analyzed	4	38509122	TLR10/TLR1/TLR6	TLR6	g.-1632A>G		T	C	0.4096	0.5234	0.6563	0.748
rs620080	Analyzed	11	104327387	CASP4/CASP5/CASP1	CASP4	g.IVS4-352G>A		C	T	0.07229	1	0.5781	0.7487
rs1234314	Analyzed	1	171444015	TNFSF4	TNFSF4	g.-1076G>C		G	C	0.4096	1	0.6563	0.7495
rs2270938	Analyzed	19	54165839	BAX	GYS1	g.IVS13-61T>A		T	A	0.4383	0.5328	0.7367	0.75
rs10931936	Analyzed	2	201852173	CASP10/CASP8	CASP8	g.IVS11+2101T>C		T	C	0.3133	0.7271	0.6603	0.7522
rs10121	Analyzed	14	64482526	GPX2	RAB15	g.Ex7-240C>T		A	G	0.06627	1	0.7238	0.7528
rs4278155	Analyzed	8	23052724	TNFRSF10B/TNFRSF10C/TNFRSF10D/TNFRSF10A	TNFRSF10D	g.IVS7-1006T>G		C	A	0.4458	1	0.6516	0.7537
rs10864549	Analyzed	1	12087624	TNFRSF8/TNFRSF1B	TNFRSF8	g.IVS4+449T>C		C	T	0.3253	0.1616	0.6605	0.7537
rs1044690	Analyzed	6	44353219	NFKBIE	LOC441151	g.Ex3-1936G>C		C	G	0.2073	0.3118	0.7001	0.754
rs2585018	Analyzed	6	90641439	CASP8AP2	CASP8AP2	g.*1189G>C		C	G	0.3133	0.7271	0.6603	0.7542
rs456671	Analyzed	6	90595803	CASP8AP2	CASP8AP2	g.-17226G>C		C	G	0.3133	0.7271	0.6603	0.7542
rs10169916	Analyzed	2	113320199	IL1A/IL1B	IL1B	g.-9921C>A		G	T	0.4759	0.3533	0.7502	0.7542
rs17784218	Analyzed	10	50435360	ERCC6	ERCC6	g.-24343T>C		G	A	0.07229	1	0.5781	0.7557
rs4253126	Analyzed	10	50372196	ERCC6	ERCC6	g.IVS7-892C>A		T	G	0.07229	1	0.5781	0.7557
rs25680	Analyzed	12	6424889	TNFRSF1A/LTBR/TNFRSF7	TNFRSF7	g.Ex2+39G>A	p.A59T	A	G	0.06627	1	0.7238	0.756
rs12583006	Analyzed	13	107735453	LIG4/TNFSF13B	TNFSF13B	g.IVS2-1699T>A		A	T	0.4277	1	0.7365	0.7566
rs11578380	Analyzed	1	67533953	IL12RB2	IL12RB2	g.-24686G>C		C	G	0.4398	0.754	0.7402	0.7572
rs2256974	Analyzed	6	31663371	LTA/TNF	LST1	g.IVS3-26C>A		A	C	0.4277	0.2107	0.7365	0.7573
rs11782002	Analyzed	8	128832046	MYC	MYC	g.*9659C>T		C	T	0.4639	0.3459	0.747	0.7576
rs204468	Analyzed	19	50182476	RELB	CLPTM1	g.Ex8-46T>C	p.G331G	C	T	0.4506	0.7574	0.7403	0.7584
rs6567326	Analyzed	18	58991588	BCL2	BCL2	g.IVS2-44616C>A		G	T	0.4639	1	0.747	0.7585
rs11043307	Analyzed	12	120979228	BCL7A	BCL7A	g.IVS5+1950C>T		T	C	0.3434	0.7271	0.7053	0.7607
rs6868898	Analyzed	5	158696998	IL12B	IL12B	g.-10629G>A		C	T	0.3598	0.7474	0.6914	0.7612
rs10892201	Analyzed	11	117353502	IL10RA	IL10RA	g.-8890C>T		T	C	0.2952	0.6967	0.6818	0.7613
rs11227247	Analyzed	11	65179429	RELA	RELA	g.IVS10+306T>G		C	A	0.4458	0.5305	0.6516	0.7619
rs7236090	Analyzed	18	59098091	BCL2	BCL2	g.IVS2+38076A>G		C	T	0.3855	0.3515	0.6585	0.7619
rs1047275	Analyzed	8	22936107	TNFRSF10B/TNFRSF10C/TNFRSF10D/TNFRSF10A	TNFRSF10B	g.Ex9+336C>G		C	G	0.494	1	0.6427	0.7635
rs12457700	Analyzed	18	59011226	BCL2	BCL2	g.IVS2-64254A>G		T	C	0.4458	0.7574	0.6516	0.7636
rs11687624	Analyzed	2	113272063	IL1A/IL1B	IL1A	g.-14244G>A		T	C	0.3434	1	0.7053	0.7642
rs3917296	Analyzed	2	102151265	IL1R1	IL1R1	g.IVS5-225A>G		G	A	0.2012	1	0.7251	0.7651
rs12612788	Analyzed	2	113271767	IL1A/IL1B	IL1A	g.-13948C>A		G	T	0.3434	0.7271	0.7053	0.7665
rs7768807	Analyzed	6	353246	IRF4	IRF4	g.Ex9+792T>C		C	T	0.3554	0.3088	0.7105	0.7668
rs2295151	Analyzed	14	103262852	XRCC3	ZFYVE21	g.IVS1-30C>G		G	C	0.4578	1	0.6496	0.7674
rs2282151	Analyzed	6	44334173	NFKBIE	NFKBIE	g.Ex6-293A>G		C	T	0.3916	1	0.7244	0.7686
rs9394963	Analyzed	6	43827369	VEGF	VEGF	g.-19052G>T		T	G	0.1951	1	0.6935	0.7693
rs2850762	Analyzed	18	59117183	BCL2	BCL2	g.IVS2+18984G>A		T	C	0.1585	0.1799	0.669	0.7702
rs2069762	Analyzed	4	123597430	IL2	IL2	g.-384G>T		C	A	0.3049	0.717	0.7344	0.772
rs6557618	Analyzed	8	23057070	TNFRSF10B/TNFRSF10C/TNFRSF10D/TNFRSF10A	TNFRSF10D	g.IVS7+838T>A		A	T	0.07229	1	0.5781	0.7722
rs12664825	Analyzed	6	44360231	NFKBIE	RP11-444E17.2	g.IVS3+1448G>A		T	C	0.4277	0.5323	0.7365	0.7724
rs4947324	Analyzed	6	31636109	LTA/TNF	NFKBIL1	g.*1741C>T		T	C	0.07831	1	0.7383	0.7724
rs1138357	Analyzed	15	78050461	BCL2A1	BCL2A1	g.Ex1+238G>A	p.C19Y	C	T	0.4639	0.7537	0.747	0.7726
rs4460370	Analyzed	8	22943553	TNFRSF10B/TNFRSF10C/TNFRSF10D/TNFRSF10A	TNFRSF10B	g.IVS3-374C>T		A	G	0.2927	0.7208	0.7314	0.7731
rs2066446	Analyzed	1	67553705	IL12RB2	IL12RB2	g.IVS1-4899A>G		G	A	0.2439	1	0.7161	0.7746
rs7709212	Analyzed	5	158696755	IL12B	IL12B	g.-10386G>A		C	T	0.4337	0.115	0.6534	0.7753
rs4072227	Analyzed	1	205024181	IL10/IL19	IL10	g.-11777G>A		C	T	0.3293	0.3088	0.7396	0.7796
rs10052709	Analyzed	5	158693055	IL12B	IL12B	g.-6686G>C		G	C	0.07229	0.1211	0.5781	0.7798
rs7003908	Analyzed	8	48933255	PRKDC	PRKDC	g.IVS48+375G>T		C	A	0.2439	0.7008	0.7161	0.781
rs17759659	Analyzed	18	59109624	BCL2	BCL2	g.IVS2+26543T>C		G	A	0.09639	1	0.6346	0.7813
rs10817686	Analyzed	9	116739671	TNFSF8	TNFSF8	g.-7266G>A		C	T	0.2256	1	0.7222	0.782
rs10940495	Analyzed	5	55298417	IL6ST	IL6ST	g.IVS5+1444T>C		G	A	0.06627	1	0.7238	0.7825
rs3213344	Analyzed	19	48752493	XRCC1	XRCC1	g.IVS3-1697C>G		C	G	0.3963	0.316	0.8213	0.7839
rs4648006	Analyzed	4	103680588	NFKB1	NFKB1	g.IVS5+2447C>T		T	C	0.08434	1	0.609	0.7854
rs3737559	Analyzed	17	38487830	BRCA1	BRCA1	g.IVS14+117G>A		T	C	0.07229	1	0.5781	0.787
rs2304583	Analyzed	15	38819430	RAD51	FAM82C	g.IVS7+193T>C		G	A	0.1084	1	0.6562	0.7877
rs12757160	Analyzed	1	85532256	BCL10	BCL10	g.-17632T>C		G	A	0.1084	1	0.6562	0.7891
rs11569864	Analyzed	1	12091110	TNFRSF8/TNFRSF1B	TNFRSF8	g.IVS4-1100C>T		T	C	0.07831	1	0.7383	0.7891
rs11778416	Analyzed	8	23010250	TNFRSF10B/TNFRSF10C/TNFRSF10D/TNFRSF10A	TNFRSF10C	g.-6329C>G		G	C	0.09036	1	0.7492	0.7896
rs2227269	Analyzed	16	3003265	TNFRSF12A	CLDN9	g.Ex2+447C>T		T	C	0.2744	1	0.7391	0.7917
rs4987808	Analyzed	18	58978566	BCL2	BCL2	g.IVS2-31594C>A		T	G	0.1145	1	0.7645	0.794
rs2849377	Analyzed	18	59122624	BCL2	BCL2	g.IVS2+13543T>A		T	A	0.07831	1	0.7383	0.7943
rs12102586	Analyzed	16	27285554	IL4R	IL4R	g.*2901C>T		T	C	0.07831	0.2431	0.7383	0.795
rs2074570	Analyzed	16	27282658	IL4R	IL4R	g.Ex12-943T>C		C	T	0.07831	0.2431	0.7383	0.795
rs1547651	Analyzed	6	43838622	VEGF	VEGF	g.-7799A>T		T	A	0.08434	1	0.609	0.7971
rs1050975	Analyzed	6	353012	IRF4	IRF4	g.Ex9+558G>A		G	A	0.2317	0.163	0.7113	0.7974
rs11064145	Analyzed	12	6325359	TNFRSF1A/LTBR/TNFRSF7	SCNN1A	g.*1940C>A		G	T	0.3049	0.2681	0.7344	0.8005
rs12151125	Analyzed	19	6475406	TNFSF9	TNFSF9	g.-6641G>T		G	T	0.25	0.4101	0.7183	0.8016
rs11191275	Analyzed	10	104132790	NFKB2	GBF1	g.*706C>T		T	C	0.1716	0.262	0.7582	0.8025
rs8177834	Analyzed	5	150390182	GPX3	TNIP1	g.Ex18+320G>A		T	C	0.1446	1	0.7057	0.8031
rs2735592	Analyzed	1	85516329	BCL10	BCL10	g.-1705A>C		G	T	0.3293	1	0.7396	0.8037
rs7720588	Analyzed	5	82412682	XRCC4	XRCC4	g.IVS1+3445C>T		T	C	0.09036	1	0.7492	0.805
rs679563	Analyzed	1	7893665	TNFRSF9	TNFRSF9	g.*9816C>T		G	A	0.1024	0.3879	0.7577	0.8071
rs10791740	Analyzed	11	104314864	CASP4/CASP5/CASP1	CASP4	g.*5825G>A		T	C	0.1145	0.4634	0.7645	0.8094
rs870849	Analyzed	12	6757281	CD4	LAG3	g.Ex7+64T>C	p.I455T	T	C	0.1627	0.5733	0.7804	0.8097
rs2448806	Analyzed	18	58932580	BCL2	BCL2	g.*14257A>G		C	T	0.09639	0.2431	0.6346	0.8098
rs10919033	Analyzed	1	159754641	FCGR2A	FCGR2A	g.Ex7+253T>C		C	T	0.1145	1	0.7645	0.8103
rs1799794	Analyzed	14	103249020	XRCC3	XRCC3	g.Ex2+2A>G		T	C	0.4878	0.5415	0.7547	0.8117
rs3744948	Analyzed	18	59073212	BCL2	BCL2	g.IVS2+62955A>G		C	T	0.1024	0.3879	0.7577	0.8132
rs4987764	Analyzed	18	59059112	BCL2	BCL2	g.IVS2+77055T>C		G	A	0.1024	0.3879	0.7577	0.8132
rs4934434	Analyzed	10	90737149	FAS	FAS	g.-3464A>C		C	A	0.4695	0.7582	0.8606	0.8142
rs11265618	Analyzed	1	152696716	IL6R	IL6R	g.IVS9+3035C>T		T	C	0.09639	1	0.6346	0.8159
rs3850641	Analyzed	1	171442455	TNFSF4	TNFSF4	g.IVS1+331T>C		G	A	0.1265	0.5379	0.7698	0.8169
rs2270132	Analyzed	15	89152872	BLM	BLM	g.IVS19-499A>C		A	C	0.4146	1	0.7512	0.8175
rs2289321	Analyzed	2	111586691	BCL2L11	BCL2L11	g.-11102T>C		C	T	0.1386	0.5704	0.7742	0.8199
rs3771202	Analyzed	2	102139101	IL1R1	IL1R1	g.IVS1-1510C>G		C	G	0.1386	0.5704	0.7742	0.82
rs720321	Analyzed	18	59033630	BCL2	BCL2	g.IVS2-86658C>T		A	G	0.1325	0.4634	0.6912	0.8204
rs2898885	Analyzed	14	64491027	GPX2	RAB15	g.IVS1-1985A>G		C	T	0.1145	0.4634	0.7645	0.8206
rs301287	Analyzed	5	82640966	XRCC4	XRCC4	g.IVS7-43734A>G		A	G	0.1446	1	0.7057	0.8212
rs609907	Analyzed	3	161175470	IL12A	IL12A	g.-14067G>A		G	A	0.1386	1	0.7742	0.8249
rs4880166	Analyzed	9	138946394	TRAF2	TRAF2	g.*6219G>T		T	G	0.1265	0.5379	0.7698	0.8253
rs715180	Analyzed	5	55333056	IL6ST	IL6ST	g.-25192T>G		C	A	0.3806	1	0.8192	0.8255
rs3181088	Analyzed	1	100971296	VCAM1	VCAM1	g.IVS7+468C>T		T	C	0.1265	0.5379	0.7698	0.8257
rs12133231	Analyzed	1	12070340	TNFRSF8/TNFRSF1B	TNFRSF8	g.IVS2+3145G>A		A	G	0.1386	0.1799	0.7742	0.8267
rs908831	Analyzed	9	138942363	TRAF2	TRAF2	g.*2188T>C		C	T	0.1687	1	0.7304	0.829
rs7539817	Analyzed	1	67540581	IL12RB2	IL12RB2	g.-18058A>G		A	G	0.2121	1	0.8062	0.8295
rs609092	Analyzed	11	104334163	CASP4/CASP5/CASP1	CASP4	g.IVS1-1531C>T		G	A	0.2289	0.163	0.7757	0.831
rs243908	Analyzed	11	111511149	IL18	IL18	g.*8379C>T		G	A	0.1687	0.5649	0.7304	0.8319
rs2075751	Analyzed	19	47065733	RPS19	RPS19	g.IVS5+70C>T		C	T	0.1627	1	0.7804	0.8325
rs16972257	Analyzed	13	107764642	LIG4/TNFSF13B	TNFSF13B	g.*7354C>T		C	T	0.1506	0.5649	0.7776	0.833
rs4310388	Analyzed	1	2497275	TNFRSF14	TNFRSF14	g.-10960C>A		T	G	0.4485	0.4844	0.8352	0.8342
rs3813199	Analyzed	1	1148140	SDF4	SDF4	g.IVS4+347C>T		A	G	0.1543	1	0.7759	0.8345
rs4851534	Analyzed	2	102020831	IL1R2	IL1R2	g.*9544A>T		T	A	0.1914	1	0.7824	0.8352
rs427115	Analyzed	19	48790037	XRCC1	IRGQ	g.IVS1-678T>C		A	G	0.2651	0.04054	0.796	0.8354
rs1182927	Analyzed	12	120923752	BCL7A	WDR66	g.IVS20-34T>C		T	C	0.1867	0.3118	0.7844	0.8362
rs50872	Analyzed	19	50554289	ERCC2/ERCC1	ERCC2	g.IVS12-1492T>C		A	G	0.1687	0.2413	0.7304	0.8363
rs2227284	Analyzed	5	132040624	IL13/IL4	IL4	g.IVS2+2527T>G		G	T	0.1386	0.02405	0.7742	0.8374
rs2213178	Analyzed	8	48979269	PRKDC	PRKDC	g.IVS26+713C>T		A	G	0.1506	0.2413	0.7776	0.838
rs976881	Analyzed	1	12156341	TNFRSF8/TNFRSF1B	TNFRSF1B	g.IVS1+6528T>C		T	C	0.2048	1	0.7597	0.8389
rs13035227	Analyzed	2	102130269	IL1R1	IL1R1	g.-10347C>T		C	T	0.1807	1	0.741	0.8397
rs6754776	Analyzed	2	102131210	IL1R1	IL1R1	g.-9406C>G		G	C	0.1807	1	0.741	0.8397
rs16893166	Analyzed	8	91021421	NBN	NBN	g.IVS15-2942C>T		A	G	0.1928	1	0.7507	0.8397
rs3765459	Analyzed	20	44190814	CD40	CD40	g.IVS8-114G>A		A	G	0.3395	0.4815	0.7806	0.841
rs3213196	Analyzed	15	89169046	BLM	BLM	g.*9532C>T		T	C	0.1687	1	0.7304	0.8424
rs206119	Analyzed	13	31787968	BRCA2	BRCA2	g.IVS1+164G>A		G	A	0.06875	1	0.7547	0.8424
rs4703951	Analyzed	5	82685725	XRCC4	XRCC4	g.*907A>G		A	G	0.2108	0.6537	0.7868	0.843
rs17797517	Analyzed	3	188948176	BCL6	BCL6	g.-14000G>A		C	T	0.259	0.2312	0.788	0.8436
rs344591	Analyzed	19	6542489	TNFSF7	TNFSF7	g.-475G>A		C	T	0.2108	0.6537	0.7868	0.8439
rs13447720	Analyzed	11	93804974	MRE11A	MRE11A	g.IVS18-2174A>G		C	T	0.2349	0.4016	0.7878	0.8446
rs11574306	Analyzed	8	31093890	WRN	WRN	g.IVS20+304G>A		A	G	0.1205	0.05403	0.6749	0.8449
rs7014045	Analyzed	8	31124838	WRN	WRN	g.IVS30+304T>A		A	T	0.1205	0.05403	0.6749	0.8449
rs10489627	Analyzed	1	67552264	IL12RB2	IL12RB2	g.IVS1+6026A>G		G	A	0.2407	1	0.7854	0.8451
rs2236876	Analyzed	1	171284109	TNFSF18	TNFSF18	g.IVS1+2395C>T		G	A	0.259	0.2312	0.788	0.8451
rs590977	Analyzed	1	12177947	TNFRSF8/TNFRSF1B	TNFRSF1B	g.IVS8+685A>C		C	A	0.2108	1	0.7868	0.8465
rs1267082	Analyzed	2	161688128	TANK	TANK	g.-56291C>T		C	T	0.2048	1	0.7597	0.8481
rs4664406	Analyzed	2	161693393	TANK	TANK	g.-51026A>G		G	A	0.2048	1	0.7597	0.8481
rs2072496	Analyzed	19	17807054	JAK3	JAK3	g.IVS14-30C>T		A	G	0.2108	0.6537	0.7868	0.8492
rs6464268	Analyzed	7	152012083	XRCC2	XRCC2	g.-7985T>C		G	A	0.1988	0.6633	0.7858	0.8506
rs17103274	Analyzed	14	34953429	NFKBIA	NFKBIA	g.-9827G>A		C	T	0.2169	1	0.768	0.8507
rs3212948	Analyzed	19	50616202	ERCC2/ERCC1	ERCC1	g.IVS3+74C>G		G	C	0.2349	0.4016	0.7878	0.8516
rs6962238	Analyzed	7	151970041	XRCC2	XRCC2	g.*6618G>C		C	G	0.2229	0.6573	0.7874	0.8518
rs3790565	Analyzed	1	67583944	IL12RB2	IL12RB2	g.IVS8-5197C>T		C	T	0.1867	0.6265	0.7844	0.852
rs723858	Analyzed	1	171284886	TNFSF18	TNFSF18	g.IVS1+1618A>T		T	A	0.2711	0.1319	0.7877	0.8522
rs3761704	Analyzed	2	111620169	BCL2L11	BCL2L11	g.IVS4+1601A>G		G	A	0.2169	0.6633	0.768	0.8539
rs1808398	Analyzed	19	6536298	TNFSF7	TNFSF7	g.*732G>A		C	T	0.2108	1	0.7868	0.854
rs12951053	Analyzed	17	7518132	TP53	TP53	g.IVS7+92T>G		C	A	0.2229	0.4153	0.7874	0.8548
rs707143	Analyzed	5	150367334	GPX3	GPX3	g.-13074T>C		T	C	0.3855	1	0.8446	0.8569
rs12458289	Analyzed	18	59129566	BCL2	BCL2	g.IVS2+6601C>A		T	G	0.2108	0.3651	0.7868	0.8576
rs2582869	Analyzed	13	107710146	LIG4/TNFSF13B	TNFSF13B	g.-10098G>A		A	G	0.2229	1	0.7874	0.858
rs315927	Analyzed	2	113582840	IL1RN	IL1RN	g.-9226C>T		T	C	0.2952	0.7208	0.7867	0.8582
rs9391981	Analyzed	6	3032005	RIPK1	RIPK1	g.IVS5+1364C>G		C	G	0.2831	0.45	0.7873	0.8589
rs9392454	Analyzed	6	3032514	RIPK1	RIPK1	g.IVS5+1873G>A		G	A	0.2831	0.45	0.7873	0.8589
rs3781575	Analyzed	11	33841895	LMO2	LMO2	g.IVS5+829A>G		C	T	0.2651	1	0.796	0.8591
rs6698806	Analyzed	1	159722810	FCGR2A	FCGR2A	g.-19071G>T		G	T	0.2169	1	0.768	0.8593
rs2297875	Analyzed	1	12064048	TNFRSF8/TNFRSF1B	TNFRSF8	g.IVS1-3060A>G		G	A	0.216	0.07909	0.7845	0.8602
rs6952003	Analyzed	7	22719230	IL6	IL6	g.-14176A>T		A	T	0.3133	0.7208	0.8182	0.8603
rs2016073	Analyzed	13	102295412	ERCC5	ERCC5	g.-1205A>G		G	A	0.3193	0.7271	0.785	0.8608
rs17169373	Analyzed	5	135274931	IL9	IL9	g.-15526T>C		A	G	0.1928	0.5945	0.7507	0.861
rs1014486	Analyzed	3	161173806	IL12A	IL12A	g.-15731T>C		C	T	0.2108	0.6537	0.7868	0.8618
rs6498012	Analyzed	16	27239475	IL4R	IL4R	g.IVS1+6633C>G		G	C	0.2892	1	0.8077	0.8638
rs12597429	Analyzed	16	11969897	TNFRSF17	TNFRSF17	g.*691C>T		T	C	0.4036	0.3321	0.7749	0.8639
rs571407	Analyzed	11	104326482	CASP4/CASP5/CASP1	CASP4	g.IVS5+380G>A		C	T	0.3253	0.06517	0.8231	0.8641
rs2181033	Analyzed	9	116737652	TNFSF8	TNFSF8	g.-5247T>C		G	A	0.3133	1	0.8182	0.8647
rs2277501	Analyzed	14	64482194	GPX2	RAB15	g.*2773A>G		T	C	0.2771	0.4306	0.802	0.8653
rs4427416	Analyzed	1	12038278	TNFRSF8/TNFRSF1B	TNFRSF8	g.-7964C>T		T	C	0.4398	0.3459	0.7688	0.8656
rs3817	Analyzed	19	48782035	XRCC1	IRGQ	g.*5982T>G		A	C	0.4458	0.3436	0.8626	0.8663
rs3763015	Analyzed	5	150377358	GPX3	GPX3	g.-3050C>T		C	T	0.3494	0.3088	0.8322	0.8665
rs50871	Analyzed	19	50554355	ERCC2/ERCC1	ERCC2	g.IVS12-1558G>T		C	A	0.253	0.6736	0.7897	0.8667
rs10956383	Analyzed	8	128832477	MYC	MYC	g.*10090C>T		C	T	0.2349	0.2053	0.7878	0.8668
rs1609846	Analyzed	19	1047529	GPX4	POLR2E	g.-1214T>G		C	A	0.247	0.406	0.788	0.8668
rs512150	Analyzed	11	93860853	MRE11A	MRE11A	g.IVS3-1955T>A		T	A	0.3916	1	0.7767	0.8674
rs529126	Analyzed	11	93833951	MRE11A	MRE11A	g.IVS11-101C>A		T	G	0.3916	1	0.7767	0.8674
rs11631974	Analyzed	15	78059055	BCL2A1	BCL2A1	g.-8538T>C		A	G	0.2651	0.406	0.796	0.8674
rs12029016	Analyzed	1	12051085	TNFRSF8/TNFRSF1B	TNFRSF8	g.IVS1+4780G>A		A	G	0.5	0.76	0.7562	0.8676
rs1318008	Analyzed	1	12048952	TNFRSF8/TNFRSF1B	TNFRSF8	g.IVS1+2647T>A		A	T	0.5	0.76	0.7562	0.8676
rs6464269	Analyzed	7	152012188	XRCC2	XRCC2	g.-8090G>C		C	G	0.3193	0.4815	0.785	0.8676
rs3138056	Analyzed	14	34938265	NFKBIA	NFKBIA	g.*2704A>G		T	C	0.3976	0.1996	0.8485	0.8678
rs4958872	Analyzed	5	150382527	GPX3	GPX3	g.IVS1+2032C>T		T	C	0.4639	0.5392	0.7641	0.8682
rs6969502	Analyzed	7	22718951	IL6	IL6	g.-14455A>G		G	A	0.4277	0.7527	0.771	0.8684
rs10751209	Analyzed	11	69736753	FADD	FADD	g.*6525C>T		C	T	0.2108	0.3651	0.7868	0.8685
rs10887883	Analyzed	10	90772953	FAS	FAS	g.*8765A>G		A	G	0.4699	1	0.869	0.8694
rs1234315	Analyzed	1	171445086	TNFSF4	TNFSF4	g.-2147G>A		T	C	0.4024	0.7489	0.7976	0.8699
rs714920	Analyzed	19	15012718	CASP14	CASP14	g.-11344T>C		C	T	0.3537	0.7316	0.8172	0.8706
rs8083946	Analyzed	18	59056901	BCL2	BCL2	g.IVS2+79266T>C		G	A	0.3916	0.5139	0.7767	0.8712
rs206127	Analyzed	13	31770177	BRCA2	FRY	g.*2579T>C		T	C	0.3494	1	0.8322	0.8719
rs1234317	Analyzed	1	171454398	TNFSF4	TNFSF4	g.-11459G>A		T	C	0.2831	0.2681	0.7873	0.8724
rs1946519	Analyzed	11	111540717	IL18	IL18	g.-9730T>G		A	C	0.494	1	0.8751	0.8724
rs2512149	Analyzed	11	117386811	IL10RA	IL10RA	g.*11244C>T		C	T	0.3614	0.7314	0.8365	0.8725
rs2301696	Analyzed	11	2383560	CD81	TRPM5	g.IVS22-161C>G		C	G	0.1975	0.3069	0.8722	0.8726
rs2707210	Analyzed	12	6772263	CD4	CD4	g.IVS1+3174G>T		G	T	0.3253	1	0.8231	0.8728
rs4985726	Analyzed	17	16804363	TNFRSF13B	TNFRSF13B	g.IVS1-7741G>C		G	C	0.3133	0.4596	0.8182	0.8733
rs11202916	Analyzed	10	90726379	FAS	FAS	g.-14234A>G		G	A	0.4096	1	0.8522	0.8738
rs13032029	Analyzed	2	113316886	IL1A/IL1B	IL1B	g.-6608G>A		T	C	0.4578	0.5328	0.8658	0.874
rs1885524	Analyzed	11	33860485	LMO2	LMO2	g.IVS1-476G>A		T	C	0.494	1	0.8751	0.8741
rs3774934	Analyzed	4	103646506	NFKB1	NFKB1	g.IVS1+4529A>G		A	G	0.3976	1	0.8485	0.8752
rs348337	Analyzed	19	6481656	TNFSF9	TNFSF9	g.-391C>T		T	C	0.2683	0.4388	0.8499	0.8756
rs1688075	Analyzed	2	113574667	IL1RN	IL1RN	g.-17399A>C		A	C	0.4157	0.05345	0.773	0.8758
rs4764622	Analyzed	12	6749463	CD4	PTMS	g.IVS3+37T>C		T	C	0.4217	0.747	0.8557	0.876
rs5758511	Analyzed	22	40666118	TNFRSF13C	C22orf18	g.IVS5-972C>T		A	G	0.4819	1	0.8721	0.8761
rs10759930	Analyzed	9	119501442	TLR4	TLR4	g.-5129C>T		C	T	0.4036	0.5323	0.7749	0.8762
rs1009373	Analyzed	20	44175408	CD40	CD40	g.-4981G>T		T	G	0.3373	1	0.8278	0.8766
rs603965	Analyzed	11	69172091	CCND1	CCND1	g.Ex4-1G>A	p.P241P	G	A	0.3554	0.3218	0.7814	0.8772
rs192655	Analyzed	6	90574999	CASP8AP2	MDN1	g.IVS1-5005C>T		A	G	0.3554	0.3218	0.7814	0.8773
rs1564483	Analyzed	18	58945634	BCL2	BCL2	g.Ex3+1339G>A		T	C	0.3193	0.07977	0.785	0.8773
rs4686467	Analyzed	3	188944990	BCL6	BCL6	g.IVS1+902T>C		A	G	0.3675	0.1847	0.78	0.8778
rs6074021	Analyzed	20	44170203	CD40	CD40	g.-10186C>G		G	C	0.3614	0.7314	0.8365	0.8779
rs6586165	Analyzed	10	90745036	FAS	FAS	g.IVS1+4393T>A		A	T	0.4578	0.7537	0.8658	0.8779
rs10195343	Analyzed	2	101967453	IL1R2	IL1R2	g.-24016A>G		A	G	0.259	0.01882	0.788	0.8784
rs11064392	Analyzed	12	6768653	CD4	CD4	g.-10912A>G		G	A	0.3795	0.7422	0.7784	0.8785
rs876435	Analyzed	8	22929478	TNFRSF10B/TNFRSF10C/TNFRSF10D/TNFRSF10A	RHOBTB2	g.IVS9+277G>A		G	A	0.4759	0.2095	0.7616	0.8787
rs230515	Analyzed	4	103690463	NFKB1	NFKB1	g.IVS5+12322A>G		G	A	0.3193	0.2944	0.785	0.8787
rs12467316	Analyzed	2	101971081	IL1R2	IL1R2	g.-20388A>C		C	A	0.2711	0.04673	0.7877	0.8801
rs4645943	Analyzed	8	128816653	MYC	MYC	g.-1368T>C		T	C	0.3675	0.04561	0.78	0.8802
rs324140	Analyzed	6	44360606	NFKBIE	RP11-444E17.2	g.IVS3+1073G>A		C	T	0.4217	0.5323	0.8557	0.8807
rs9381307	Analyzed	6	44361369	NFKBIE	RP11-444E17.2	g.IVS3+310G>A		T	C	0.4217	0.5323	0.8557	0.8807
rs16972216	Analyzed	13	107732621	LIG4/TNFSF13B	TNFSF13B	g.IVS2-4531G>A		A	G	0.3916	1	0.7767	0.8811
rs3781578	Analyzed	11	33863402	LMO2	LMO2	g.IVS1-3393C>T		A	G	0.488	0.3474	0.759	0.8817
rs962409	Analyzed	1	85505529	BCL10	BCL10	g.Ex4+725T>G		C	A	0.4819	0.3469	0.8721	0.8817
rs7674640	Analyzed	4	103759828	NFKB1	NFKB1	g.*3030C>T		T	C	0.3916	0.5139	0.7767	0.8819
rs2415290	Analyzed	14	34956706	NFKBIA	DNAJC8P1	g.NC_-12001C>T		C	T	0.4157	0.754	0.773	0.882
rs11637028	Analyzed	15	50179801	BCL2L10	BCL2L10	g.*9535T>C		G	A	0.4398	0.5328	0.7688	0.8828
rs4802527	Analyzed	19	54141655	BAX	DHDH	g.*1652C>G		G	C	0.08125	0.2488	0.7723	0.8832
rs9852519	Analyzed	3	161203322	IL12A	IL12A	g.*7281C>T		C	T	0.4337	0.754	0.8592	0.8846
rs2884364	Analyzed	2	161685893	TANK	TANK	g.-58526A>G		A	G	0.4759	0.5314	0.7616	0.8859
rs12141269	Analyzed	1	46477693	RAD54L	RAD54L	g.-8971T>C		T	C	0.07927	1	0.7725	0.8867
rs11216666	Analyzed	11	117381245	IL10RA	IL10RA	g.*5678C>T		C	T	0.4217	0.5323	0.8557	0.8871
rs2889	Analyzed	8	22931854	TNFRSF10B/TNFRSF10C/TNFRSF10D/TNFRSF10A	RHOBTB2	g.Ex10+1145A>G		G	A	0.439	0.2184	0.7822	0.8877
rs6894567	Analyzed	5	158689546	IL12B	IL12B	g.IVS1+472T>C		G	A	0.4277	0.05797	0.771	0.8884
rs2546890	Analyzed	5	158692478	IL12B	IL12B	g.-6109T>C		A	G	0.4578	0.5328	0.8658	0.8887
rs6495460	Analyzed	15	78044410	BCL2A1	BCL2A1	g.IVS1-3839A>G		C	T	0.3675	0.04561	0.78	0.8914
rs2569253	Analyzed	5	158683571	IL12B	IL12B	g.IVS2-656A>G		T	C	0.4819	0.1157	0.8721	0.8923
rs12545733	Analyzed	8	23012948	TNFRSF10B/TNFRSF10C/TNFRSF10D/TNFRSF10A	TNFRSF10C	g.-3631C>T		T	C	0.2647	0.6454	0.8548	0.8934
rs4648141	Analyzed	4	103755947	NFKB1	NFKB1	g.IVS23-690G>A		A	G	0.06618	1	0.7997	0.8941
rs997476	Analyzed	4	103761053	NFKB1	NFKB1	g.*4255T>G		T	G	0.06618	1	0.7997	0.8941
rs671106	Analyzed	1	12120766	TNFRSF8/TNFRSF1B	TNFRSF8	g.IVS13-107G>A		G	A	0.2353	0.6432	0.849	0.9046
rs11654431	Analyzed	17	16785588	TNFRSF13B	TNFRSF13B	g.IVS3-1038G>T		A	C	0.09559	1	0.857	0.9062
rs2244012	Analyzed	5	131929124	RAD50	RAD50	g.IVS2+6166A>G		G	A	0.1524	0.5649	0.828	0.9102
rs4497356	Analyzed	10	115467429	CASP7	CASP7	g.IVS4-3352T>A		A	T	0.1341	0.1339	0.9021	0.9126
rs4656308	Analyzed	1	159745375	FCGR2A	FCGR2A	g.IVS3-859C>T		C	T	0.1524	0.1799	0.828	0.9215
rs238767	Analyzed	19	6468122	TNFSF9	TUBB4	g.-14898T>C		G	A	0.2317	1	0.8638	0.9222
rs156640	Analyzed	19	53322575	LIG1	LIG1	g.IVS20-158C>G		G	C	0.2866	1	0.8629	0.9306
rs9793263	Analyzed	1	46494976	RAD54L	RAD54L	g.IVS3-1969A>G		A	G	0.25	0.7008	0.8569	0.9344
rs4242392	Analyzed	8	23117578	TNFRSF10B/TNFRSF10C/TNFRSF10D/TNFRSF10A	TNFRSF10A	g.IVS2-1359A>G		C	T	0.3049	0.2788	0.8946	0.9346
rs3730913	Analyzed	19	53344612	LIG1	LIG1	g.IVS9+220C>T		A	G	0.3415	0.7321	0.9168	0.9346
rs7901656	Analyzed	10	90756193	FAS	FAS	g.IVS2-1244T>C		C	T	0.4817	1	0.8758	0.9348
rs1075838	Analyzed	12	6775976	CD4	CD4	g.IVS1-3523T>C		C	T	0.3415	0.1522	0.9168	0.9348
rs3172469	Analyzed	3	188941782	BCL6	BCL6	g.IVS1+4110A>C		G	T	0.3841	0.7422	0.8725	0.9356
rs2147420	Analyzed	10	90749593	FAS	FAS	g.IVS1-3173A>G		A	G	0.4817	0.5314	0.8758	0.9367
rs2071080	Analyzed	12	6805250	CD4	GPR162	g.IVS3+151C>T		T	C	0.3841	0.7432	0.8725	0.9371
rs1571011	Analyzed	10	90747767	FAS	FAS	g.IVS1-4999A>C		A	C	0.4817	0.7542	0.8758	0.9375
rs941940	Analyzed	11	33881363	LMO2	LMO2	g.-33854C>T		A	G	0.3963	0.1996	0.8732	0.939
rs1523474	Analyzed	3	188942191	BCL6	BCL6	g.IVS1+3701A>G		T	C	0.4451	1	0.8751	0.942
rs5996088	Analyzed	22	40653859	TNFRSF13C	TNFRSF13C	g.-1135G>A		T	C	0.05769	1	0.7916	0.9429
rs11569835	Analyzed	1	12079875	TNFRSF8/TNFRSF1B	TNFRSF8	g.IVS3+14T>C		C	T	0.2836	1	0.9134	0.9445
rs17292115	Analyzed	9	116739566	TNFSF8	TNFSF8	g.-7161T>G		C	A	0.05882	0.09158	0.9316	0.9506
rs2074451	Analyzed	19	1058035	GPX4	GPX4	g.*463G>T		T	G	0.3625	0.4982	0.9279	0.954
rs9033	Analyzed	16	65739500	TRADD	LIN10	g.Ex16-444A>G		G	A	0.3457	0.2999	0.9091	0.9693
rs1042265	Analyzed	19	54163632	BAX	GYS1	g.Ex16-439C>T		A	G	0.05422	1	0.7599	1
rs11569515	Analyzed	19	6641244	TNFSF14	C3	g.IVS27+396A>C		G	T	0.05422	1	0.7599	1
rs11667200	Analyzed	19	54147737	BAX	BAX	g.-2260A>T		A	T	0.05422	1	0.7599	1
rs11667351	Analyzed	19	54147966	BAX	BAX	g.-2031T>G		G	T	0.05422	1	0.7599	1
rs11775256	Analyzed	8	23107430	TNFRSF10B/TNFRSF10C/TNFRSF10D/TNFRSF10A	TNFRSF10A	g.IVS9-1959G>A		T	C	0.05422	1	0.7599	1
rs11161586	Analyzed	1	85534374	BCL10	BCL10	g.-19750G>A		C	T	0.06627	1	0.7866	1
rs1980422	Analyzed	2	204318641	CD28	CD28	g.*10760C>T		C	T	0.06627	1	0.7866	1
rs2243248	Analyzed	5	132036543	IL13/IL4	IL4	g.-1098G>T		G	T	0.06627	1	0.7866	1
rs344584	Analyzed	19	6555018	TNFSF7	TNFSF7	g.-13004G>C		G	C	0.06627	0.002344	0.7866	1
rs4949927	Analyzed	1	85512612	BCL10	BCL10	g.IVS2+1955A>G		C	T	0.06627	1	0.7866	1
rs2243263	Analyzed	5	132041198	IL13/IL4	IL4	g.IVS2-2107C>G		C	G	0.07831	0.1782	0.8075	1
rs4648095	Analyzed	4	103746914	NFKB1	NFKB1	g.IVS17+22T>C		C	T	0.07831	1	0.8075	1
rs17121510	Analyzed	11	117381365	IL10RA	IL10RA	g.*5798A>G		G	A	0.09036	1	0.8245	1
rs3136597	Analyzed	3	173711238	TNFSF10	TNFSF10	g.IVS3+863C>A		T	G	0.09036	0.2431	0.8245	1
rs12083537	Analyzed	1	152647727	IL6R	IL6R	g.IVS1+2913A>G		G	A	0.1024	0.3137	0.8387	1
rs17382844	Analyzed	1	85495906	BCL10	C1orf52	g.IVS2+889T>C		G	A	0.1024	1	0.8387	1
rs2183016	Analyzed	9	119525036	TLR4	TLR4	g.*8288C>A		C	A	0.1024	1	0.8387	1
rs2844482	Analyzed	6	31647746	LTA/TNF	LTA	g.-752T>C		T	C	0.1024	0.3137	0.8387	1
rs7045953	Analyzed	9	119525616	TLR4	TLR4	g.*8868A>G		G	A	0.1024	1	0.8387	1
rs11820190	Analyzed	11	129256367	NFRKB	NFRKB	g.IVS11+181A>G		C	T	0.07927	0.1825	0.8435	1
rs281438	Analyzed	19	10260375	ICAM1/ICAM4/ICAM5	ICAM4	g.*594G>T		G	T	0.1145	1	0.8509	1
rs348389	Analyzed	19	6486637	TNFSF9	TNFSF9	g.Ex3-297C>T		T	C	0.1145	1	0.8509	1
rs1041569	Analyzed	13	107717544	LIG4/TNFSF13B	TNFSF13B	g.-2700T>A		T	A	0.1265	0.08605	0.8615	1
rs11918343	Analyzed	3	173730474	TNFSF10	TNFSF10	g.-6605G>A		T	C	0.1265	0.4634	0.8615	1
rs17601879	Analyzed	3	173740825	TNFSF10	TNFSF10	g.-16956G>A		C	T	0.1265	0.4634	0.8615	1
rs2042236	Analyzed	5	150378308	GPX3	GPX3	g.-2100A>G		A	G	0.1265	1	0.8615	1
rs496888	Analyzed	1	12155393	TNFRSF8/TNFRSF1B	TNFRSF1B	g.IVS1+5580T>C		C	T	0.1265	1	0.8615	1
rs8177406	Analyzed	5	150379827	GPX3	GPX3	g.-581C>T		C	T	0.1265	1	0.8615	1
rs9534154	Analyzed	13	31784213	BRCA2	BRCA2	g.-4384G>A		A	G	0.1265	1	0.8615	1
rs9879554	Analyzed	3	173738099	TNFSF10	TNFSF10	g.-14230T>A		T	A	0.1265	0.4634	0.8615	1
rs7911226	Analyzed	10	90758945	FAS	FAS	g.IVS4+211A>G		A	G	0.494	0.5415	0.8781	1
rs4584412	Analyzed	1	100954164	VCAM1	VCAM1	g.-3840A>G		G	A	0.1506	1	0.8795	1
rs7008760	Analyzed	8	23013064	TNFRSF10B/TNFRSF10C/TNFRSF10D/TNFRSF10A	TNFRSF10C	g.-3515C>G		C	G	0.1506	0.5704	0.8795	1
rs11096956	Analyzed	4	38452575	TLR10/TLR1/TLR6	TLR10	g.Ex4+1094G>T	p.P344P	C	A	0.4819	0.3586	0.881	1
rs2277984	Analyzed	19	6630511	TNFSF14	C3	g.IVS36-4G>A		T	C	0.4819	0.76	0.881	1
rs4513579	Analyzed	4	38450211	TLR10/TLR1/TLR6	TLR10	g.*959G>A		T	C	0.4819	0.3586	0.881	1
rs4968212	Analyzed	17	7408940	TRADD	SENP3	g.IVS3+35T>C		T	C	0.4819	0.2095	0.881	1
rs745327	Analyzed	12	120940907	BCL7A	BCL7A	g.-3473C>T		C	T	0.4819	0.76	0.881	1
rs8177429	Analyzed	5	150383291	GPX3	GPX3	g.IVS1-1803G>C		G	C	0.4819	0.3586	0.881	1
rs1201110	Analyzed	1	12075775	TNFRSF8/TNFRSF1B	TNFRSF8	g.IVS2-3970G>A		G	A	0.4699	1	0.8838	1
rs17103286	Analyzed	14	34954792	NFKBIA	NFKBIA	g.-11190T>C		G	A	0.4699	1	0.8838	1
rs6537060	Analyzed	4	142871503	IL15	IL15	g.IVS8+916G>A		A	G	0.4578	0.7574	0.8866	1
rs1322055	Analyzed	9	116709406	TNFSF8	TNFSF8	g.IVS2-1406G>A		C	T	0.1627	1	0.8872	1
rs17690122	Analyzed	5	131895734	IL5	IL5	g.*9667T>C		G	A	0.1627	0.5649	0.8872	1
rs3136594	Analyzed	3	173713278	TNFSF10	TNFSF10	g.IVS2-1135C>T		A	G	0.1627	0.5649	0.8872	1
rs3891248	Analyzed	8	128819321	MYC	MYC	g.IVS1-355T>A		A	T	0.4695	0.2159	0.8907	1
rs7941248	Analyzed	11	33882551	LMO2	LMO2	g.-35042G>A		T	C	0.4337	0.7527	0.8919	1
rs1785882	Analyzed	11	104428285	CASP4/CASP5/CASP1	CASP1	g.-17234T>A		T	A	0.4096	0.747	0.8971	1
rs7843320	Analyzed	8	23043782	TNFRSF10B/TNFRSF10C/TNFRSF10D/TNFRSF10A	TNFRSF10D	g.*7545A>G		T	C	0.3976	0.3515	0.8996	1
rs2414133	Analyzed	15	50199855	BCL2L10	GNB5	g.*2390T>C		G	A	0.3735	1	0.9046	1
rs4674259	Analyzed	2	218699250	IL8RB/IL8RA	IL8RB	g.Ex1-72G>A		A	G	0.3735	1	0.9046	1
rs11569523	Analyzed	19	6640042	TNFSF14	C3	g.IVS27+1598G>A		T	C	0.1988	0.6265	0.9067	1
rs4390174	Analyzed	1	204999074	IL10/IL19	IL10	g.*9529T>C		G	A	0.1988	1	0.9067	1
rs1056890	Analyzed	10	104152760	NFKB2	PSD	g.Ex17-395C>T		A	G	0.128	1	0.9092	1
rs3916874	Analyzed	19	50548766	ERCC2/ERCC1	ERCC2	g.IVS17-334G>C		G	C	0.128	0.4728	0.9092	1
rs2844484	Analyzed	6	31644203	LTA/TNF	LTA	g.-4295G>A		A	G	0.3494	0.7314	0.9094	1
rs3752447	Analyzed	13	31879142	BRCA2	CG018	g.IVS5+245G>A		T	C	0.3494	0.514	0.9094	1
rs7757906	Analyzed	6	357741	IRF4	IRF4	g.*5142A>G		A	G	0.3494	0.7314	0.9094	1
rs1039559	Analyzed	4	38507991	TLR10/TLR1/TLR6	TLR6	g.-501C>T		G	A	0.3373	1	0.9118	1
rs1047768	Analyzed	13	102302518	ERCC5	ERCC5	g.Ex2+50T>C	p.H46H	C	T	0.2108	0.6633	0.9124	1
rs13388646	Analyzed	2	111581386	BCL2L11	ACOXL	g.*13839C>T		T	C	0.2108	0.6633	0.9124	1
rs206132	Analyzed	13	31774296	BRCA2	FRY	g.*6698G>A		A	G	0.2108	0.3298	0.9124	1
rs31563	Analyzed	5	135263505	IL9	IL9	g.-4100A>G		T	C	0.2108	0.6633	0.9124	1
rs3782726	Analyzed	12	6339932	TNFRSF1A/LTBR/TNFRSF7	SCNN1A	g.IVS4+1546C>A		G	T	0.2108	1	0.9124	1
rs683240	Analyzed	1	12172416	TNFRSF8/TNFRSF1B	TNFRSF1B	g.IVS2+877A>G		G	A	0.2108	1	0.9124	1
rs726430	Analyzed	2	111647892	BCL2L11	BCL2L11	g.*9612T>C		C	T	0.2108	0.6633	0.9124	1
rs1598859	Analyzed	4	103725482	NFKB1	NFKB1	g.IVS11+467T>C		C	T	0.3253	0.2944	0.9142	1
rs2647395	Analyzed	1	85501252	BCL10	BCL10	g.*4645C>G		G	C	0.3012	0.4596	0.9188	1
rs2707212	Analyzed	12	6771395	CD4	CD4	g.IVS1+2306C>T		T	C	0.3012	0.7208	0.9188	1
rs7550488	Analyzed	1	12201519	TNFRSF8/TNFRSF1B	LOC390998	g.*1916T>C		A	G	0.3012	0.7208	0.9188	1
rs9378805	Analyzed	6	362727	IRF4	IRF4	g.*10128A>C		C	A	0.3012	0.7208	0.9188	1
rs10207930	Analyzed	2	113577332	IL1RN	IL1RN	g.-14734C>A		A	C	0.2892	0.45	0.9211	1
rs16902364	Analyzed	8	128814448	MYC	MYC	g.-3573A>C		C	A	0.2892	1	0.9211	1
rs10132858	Analyzed	14	64473731	GPX2	GPX2	g.*2227T>C		G	A	0.2349	1	0.9227	1
rs7845909	Analyzed	8	48846918	PRKDC	PRKDC	g.*2368A>T		T	A	0.2771	0.2389	0.9234	1
rs12546235	Analyzed	8	23018464	TNFRSF10B/TNFRSF10C/TNFRSF10D/TNFRSF10A	TNFRSF10C	g.IVS1+1825C>T		T	C	0.2651	0.4306	0.9257	1
rs2737844	Analyzed	14	64478262	GPX2	GPX2	g.IVS1+714C>T		G	A	0.247	1	0.9274	1
rs8031341	Analyzed	15	89114228	BLM	BLM	g.IVS12+408A>G		G	A	0.247	0.4016	0.9274	1
rs10057194	Analyzed	5	82694327	XRCC4	XRCC4	g.*9509A>G		G	A	0.253	0.406	0.928	1
rs3025030	Analyzed	6	43858565	VEGF	VEGF	g.IVS7+763G>C		C	G	0.253	0.2448	0.928	1
rs6715873	Analyzed	2	101956158	IL1R2	IL1R2	g.-35311A>G		G	A	0.253	0.406	0.928	1
rs924080	Analyzed	1	67532728	IL12RB2	IL12RB2	g.-25911T>C		C	T	0.253	0.09085	0.928	1
rs2072352	Analyzed	15	89135183	BLM	BLM	g.IVS15+105G>A		A	G	0.259	0.2448	0.932	1
rs12961672	Analyzed	18	59033833	BCL2	BCL2	g.IVS2-86861C>G		C	G	0.2289	0.4153	0.9326	1
rs4703950	Analyzed	5	82661774	XRCC4	XRCC4	g.IVS7-22926C>A		C	A	0.2289	0.6573	0.9326	1
rs4982271	Analyzed	14	34963376	NFKBIA	DNAJC8P1	g.NC_-5331G>T		G	T	0.2289	1	0.9326	1
rs11196454	Analyzed	10	115483723	CASP7	CASP7	g.*4433C>T		T	C	0.2169	0.07248	0.9349	1
rs6916921	Analyzed	6	31628405	LTA/TNF	NFKBIL1	g.IVS2+4210C>T		T	C	0.2169	1	0.9349	1
rs3783516	Analyzed	2	113262149	IL1A/IL1B	IL1A	g.-4330A>G		T	C	0.2711	0.1146	0.9363	1
rs4253234	Analyzed	10	50336488	ERCC6	ERCC6	g.*378C>G		C	G	0.2711	0.1146	0.9363	1
rs8018407	Analyzed	14	34955037	NFKBIA	NFKBIA	g.-11435G>A		T	C	0.2711	0.2312	0.9363	1
rs235249	Analyzed	1	12180818	TNFRSF8/TNFRSF1B	TNFRSF1B	g.IVS8+3556T>C		C	T	0.2048	1	0.9372	1
rs4007	Analyzed	11	33844118	LMO2	LMO2	g.IVS4-1179A>T		A	T	0.2048	0.6633	0.9372	1
rs6427627	Analyzed	1	152625803	IL6R	MRPS33P1	g.NC_-8585G>A		C	T	0.2048	0.6633	0.9372	1
rs1860545	Analyzed	12	6317038	TNFRSF1A/LTBR/TNFRSF7	TNFRSF1A	g.IVS1-3367C>T		A	G	0.1928	1	0.9395	1
rs10111172	Analyzed	8	23025036	TNFRSF10B/TNFRSF10C/TNFRSF10D/TNFRSF10A	TNFRSF10C	g.IVS1-142T>C		T	C	0.1807	0.1036	0.9419	1
rs20541	Analyzed	5	132023863	IL13/IL4	IL13	g.Ex4+98A>G	p.Q144R	A	G	0.1807	1	0.9419	1
rs11046349	Analyzed	12	8648058	AICDA	AICDA	g.Ex5+143A>C		G	T	0.1687	0.5733	0.9443	1
rs2466183	Analyzed	8	22928002	TNFRSF10B/TNFRSF10C/TNFRSF10D/TNFRSF10A	RHOBTB2	g.IVS7-146G>T		G	T	0.1687	1	0.9443	1
rs1883838	Analyzed	20	44195303	CD40	CD40	g.*4216C>T		T	C	0.2952	0.45	0.9444	1
rs6920337	Analyzed	6	3018911	RIPK1	RIPK1	g.-3145A>G		A	G	0.2952	1	0.9444	1
rs4902348	Analyzed	14	64489705	GPX2	RAB15	g.IVS1-663C>T		A	G	0.1566	1	0.9467	1
rs8096471	Analyzed	18	59099373	BCL2	BCL2	g.IVS2+36794T>C		A	G	0.1566	1	0.9467	1
rs1267072	Analyzed	2	161755827	TANK	TANK	g.IVS2+11309C>T		T	C	0.3072	1	0.9483	1
rs1293344	Analyzed	11	111542594	IL18	TEX12	g.-2607A>G		G	A	0.1446	0.5704	0.9491	1
rs2305742	Analyzed	19	18052441	IL12RB1	IL12RB1	g.IVS4+201T>G		C	A	0.1446	0.5704	0.9491	1
rs3766735	Analyzed	1	12117332	TNFRSF8/TNFRSF1B	TNFRSF8	g.IVS12-900G>A		A	G	0.1325	0.5379	0.9516	1
rs6835636	Analyzed	4	154809799	TLR2	TLR2	g.-33710A>G		A	G	0.1325	0.5379	0.9516	1
rs9827569	Analyzed	3	188935176	BCL6	BCL6	g.IVS3+175C>A		T	G	0.1325	0.5379	0.9516	1
rs2062011	Analyzed	18	59027094	BCL2	BCL2	g.IVS2-80122A>T		A	T	0.3193	0.717	0.952	1
rs11677140	Analyzed	2	113582279	IL1RN	IL1RN	g.-9787A>C		C	A	0.1205	1	0.9542	1
rs662959	Analyzed	3	161183925	IL12A	IL12A	g.-5612G>A		A	G	0.1205	1	0.9542	1
rs6970449	Analyzed	7	152011384	XRCC2	XRCC2	g.-7286G>A		T	C	0.3313	0.4815	0.9556	1
rs12358301	Analyzed	10	115487308	CASP7	CASP7	g.*8018C>T		C	T	0.1084	1	0.9568	1
rs1383048	Analyzed	4	123612280	IL2	IL2	g.-15234G>C		C	G	0.1084	0.3879	0.9568	1
rs17183763	Analyzed	15	89167134	BLM	BLM	g.*7620C>G		C	G	0.1084	1	0.9568	1
rs1408047	Analyzed	13	102282919	ERCC5	BIVM	g.IVS8+871C>T		C	T	0.3434	0.486	0.9592	1
rs2072474	Analyzed	2	102005641	IL1R2	IL1R2	g.IVS7+498A>G		G	A	0.3434	0.486	0.9592	1
rs2296327	Analyzed	14	64480300	GPX2	GPX2	g.-1102A>G		C	T	0.3434	1	0.9592	1
rs767540	Analyzed	19	48782349	XRCC1	IRGQ	g.*5668G>A		T	C	0.09639	1	0.9596	1
rs2834176	Analyzed	21	33598240	IL10RB	IL10RB	g.*7707A>T		T	A	0.3232	0.4894	0.961	1
rs2856836	Analyzed	2	113248554	IL1A/IL1B	IL1A	g.Ex7-592T>C		G	A	0.08434	0.2431	0.9624	1
rs365179	Analyzed	19	18042278	IL12RB1	IL12RB1	g.IVS10+94G>A		T	C	0.3554	0.04695	0.9626	1
rs11576939	Analyzed	1	85514600	BCL10	BCL10	g.Ex2-34C>G	p.L8L	C	G	0.07229	1	0.9654	1
rs12296430	Analyzed	12	6373761	TNFRSF1A/LTBR/TNFRSF7	LTBR	g.*3396C>G		C	G	0.07229	0.1782	0.9654	1
rs16944884	Analyzed	15	89160644	BLM	BLM	g.*1130A>T		A	T	0.07229	1	0.9654	1
rs2054440	Analyzed	5	150365152	GPX3	GPX3	g.-15256A>G		A	G	0.07229	1	0.9654	1
rs3093662	Analyzed	6	31652168	LTA/TNF	TNF	g.IVS1-122A>G		G	A	0.07229	1	0.9654	1
rs4646092	Analyzed	1	15694260	CASP9	CASP9	g.IVS7+95G>A		T	C	0.07229	1	0.9654	1
rs3851005	Analyzed	16	11978714	TNFRSF17	RUNDC2A	g.IVS1+543C>T		C	T	0.3675	1	0.966	1
rs10508198	Analyzed	13	107740789	LIG4/TNFSF13B	TNFSF13B	g.IVS3+3581G>C		C	G	0.06024	1	0.9686	1
rs11196418	Analyzed	10	115428456	CASP7	CASP7	g.-13264A>G		A	G	0.06024	1	0.9686	1
rs12358524	Analyzed	10	115441771	CASP7	CASP7	g.Ex3-49C>T	p.N17N	T	C	0.06024	1	0.9686	1
rs1267034	Analyzed	2	161780984	TANK	TANK	g.IVS4-7688A>G		G	A	0.06024	1	0.9686	1
rs344542	Analyzed	19	6638517	TNFSF14	C3	g.IVS27-604T>C		A	G	0.06024	1	0.9686	1
rs7514863	Analyzed	1	209550723	TRAF5	RCOR3	g.IVS9-1962A>T		T	A	0.06024	1	0.9686	1
rs2071082	Analyzed	12	6806048	CD4	GPR162	g.IVS4-31A>T		T	A	0.3889	0.316	0.9714	1
rs1151403	Analyzed	13	107656374	LIG4/TNFSF13B	LIG4	g.*2507G>A		T	C	0.3916	0.7422	0.9725	1
rs3774933	Analyzed	4	103645369	NFKB1	NFKB1	g.IVS1+3392T>C		C	T	0.4036	1	0.9757	1
rs4871850	Analyzed	8	23062121	TNFRSF10B/TNFRSF10C/TNFRSF10D/TNFRSF10A	TNFRSF10D	g.IVS2-112C>T		A	G	0.4157	0.3321	0.9788	1
rs6684439	Analyzed	1	152662463	IL6R	IL6R	g.IVS1-5833C>T		T	C	0.4157	0.747	0.9788	1
rs9928563	Analyzed	16	11949370	TNFRSF17	TNFRSF17	g.-17312C>G		C	G	0.4157	0.747	0.9788	1
rs1143643	Analyzed	2	113304773	IL1A/IL1B	IL1B	g.IVS6-152G>A		C	T	0.4398	0.7527	0.985	1
rs2250246	Analyzed	12	6423277	TNFRSF1A/LTBR/TNFRSF7	TNFRSF7	g.-1245G>A		A	G	0.4518	0.02656	0.988	1
rs230510	Analyzed	4	103695201	NFKB1	NFKB1	g.IVS5-11979A>T		T	A	0.4518	1	0.988	1
rs7325708	Analyzed	13	102297492	ERCC5	ERCC5	g.IVS1+787C>G		G	C	0.4639	0.2086	0.991	1
rs2345000	Analyzed	5	150363456	GPX3	GPX3	g.-16952A>C		C	A	0.2622	0.09418	0.9931	1
rs1907949	Analyzed	4	142866773	IL15	IL15	g.IVS6-1770C>T		T	C	0.4759	0.2183	0.994	1
rs2546893	Analyzed	5	158688538	IL12B	IL12B	g.IVS1+1480C>T		G	A	0.4759	0.1157	0.994	1
rs3741920	Analyzed	12	6809133	CD4	LEPREL2	g.IVS2-151C>T		T	C	0.4759	0.5392	0.994	1
rs6686931	Analyzed	1	205022274	IL10/IL19	IL10	g.-9870G>A		C	T	0.4759	0.5392	0.994	1
rs206135	Analyzed	13	31774514	BRCA2	FRY	g.*6916T>C		C	T	0.2574	0.4023	0.9954	1
rs31564	Analyzed	5	135258152	IL9	IL9	g.IVS3-413C>A		G	T	0.488	0.3586	0.997	1
rs3786536	Analyzed	19	47064297	RPS19	RPS19	g.IVS3-644C>A		A	C	0.488	0.2095	0.997	1
rs7549250	Analyzed	1	152670960	IL6R	IL6R	g.IVS3+1254C>T		C	T	0.488	0.1248	0.997	1
rs11820062	Analyzed	11	65186512	RELA	RELA	g.IVS1-260A>G		T	C	0.4375	0.1953	1	1
rs1859378	Analyzed	16	2991124	TNFRSF12A	CLDN9	g.-12240T>C		T	C	0.3077	0.1258	1	1
rs2043055	Analyzed	11	111536834	IL18	IL18	g.IVS1+3005T>C		A	G	0.5	0.7545	1	1
rs2243291	Analyzed	5	132046882	IL13/IL4	IL4	g.*703C>G		G	C	0.2195	0.07248	1	1
rs2784081	Analyzed	9	138911712	TRAF2	TRAF2	g.IVS1-1274C>A		C	A	0.125	0.4728	1	1
rs2850764	Analyzed	18	59144495	BCL2	FVT1	g.*5499G>C		G	C	0.2317	0.4153	1	1
rs3764875	Analyzed	12	6328345	TNFRSF1A/LTBR/TNFRSF7	SCNN1A	g.IVS11+32G>A		C	T	0.25	1	1	1
rs4845623	Analyzed	1	152682401	IL6R	IL6R	g.IVS6-4824A>G		G	A	0.4146	0.747	1	1
rs7309	Analyzed	2	161800886	TANK	TANK	g.Ex8-43G>A		G	A	0.5	0.7545	1	1
rs7312492	Analyzed	12	6420012	TNFRSF1A/LTBR/TNFRSF7	LOC390284	g.NC_*1752C>T		T	C	0.5	0.3474	1	1
rs10008383	MAF<0.05	4	142881585	IL15	IL15	g.*8133A>C		C	A	0.006024	1	-	-
rs10008492	Monomorphism	4	38442115	TLR10/TLR1/TLR6	TLR10	g.*9055G>A		-	T	0	1	-	-
rs10128650	Monomorphism	11	33888627	LMO2	LMO2	g.-41118T>G		-	A	0	1	-	-
rs10156056	Monomorphism	7	22720613	IL6	IL6	g.-12793C>G		-	G	0	1	-	-
rs10203477	MAF<0.05	2	60958489	REL	REL	g.-3990A>T		T	A	0.0241	1	-	-
rs10211663	MAF<0.05	2	204271260	CD28	CD28	g.-8404T>C		T	C	0.01205	1	-	-
rs1033180	Monomorphism	6	328546	IRF4	IRF4	g.-9606C>T		-	C	0	1	-	-
rs10415368	MAF<0.05	19	6467594	TNFSF9	TUBB4	g.-14370G>A		C	T	0.006173	1	-	-
rs1042881	Failed Validation	1	159763154	FCGR2A	HSPA6	g.Ex1-158C>G		-	-	-	-	-	-
rs1045485	Monomorphism	2	201857834	CASP10/CASP8	CASP8	g.Ex13+51G>C	p.D285H	-	G	0	1	-	-
rs1045546	MAF<0.05	12	6438168	TNFRSF1A/LTBR/TNFRSF7	TNFRSF1A/LTBR/TNFRSF7	g.Ex5+97C>T	p.T334M	T	C	0.01807	1	-	-
rs10474079	Monomorphism	5	82409673	XRCC4	XRCC4	g.IVS1+436G>A		-	G	0	1	-	-
rs10489270	Monomorphism	1	171424387	TNFSF4	TNFSF4	g.IVS1-56C>T		-	G	0	1	-	-
rs1049253	Monomorphism	4	185785945	CASP3	CASP3	g.Ex8-102T>C		-	A	0	1	-	-
rs10495746	Monomorphism	2	24156384	TP53I3	TP53I3	g.IVS3-370A>T		-	T	0	1	-	-
rs10498658	Monomorphism	6	3049695	RIPK1	RIPK1	g.IVS7+147C>T		-	C	0	1	-	-
rs10500136	MAF<0.05	7	142724366	CASP2	CLCN1	g.IVS1+759T>C		C	T	0.01807	1	-	-
rs10505505	Monomorphism	8	128808953	MYC	MYC	g.-9068G>T		-	T	0	1	-	-
rs10509561	MAF<0.05	10	90741892	FAS	FAS	g.IVS1+1249T>A		A	T	0.01807	1	-	-
rs1051070	Failed Validation	10	90764752	FAS	FAS	g.Ex9-771A>T		-	-	-	-	-	-
rs1057050	Monomorphism	10	104132284	NFKB2	GBF1	g.Ex40-356G>A		-	G	0	1	-	-
rs10776572	Monomorphism	10	50328543	ERCC6	ERCC6	g.*8323T>G		-	C	0	1	-	-
rs10818069	Monomorphism	9	119493792	TLR4	TLR4	g.-12779A>C		-	C	0	1	-	-
rs10836127	MAF<0.05	11	33864374	LMO2	LMO2	g.IVS1-4365G>T		A	C	0.01807	1	-	-
rs10850	MAF<0.05	2	127780415	ERCC3	MAP3K2	g.Ex16-168A>G		T	C	0.006024	1	-	-
rs10897141	Monomorphism	11	60653915	CD5	VPS37C	g.*1952A>G		-	C	0	1	-	-
rs10912560	MAF<0.05	1	171431080	TNFSF4	TNFSF4	g.IVS1-6749T>C		G	A	0.0241	1	-	-
rs10982448	Monomorphism	9	116712065	TNFSF8	TNFSF8	g.IVS2-4065A>G		-	T	0	1	-	-
rs11020806	Failed Validation	11	93883620	MRE11A	ANKRD49	g.*12273A>G		-	-	-	-	-	-
rs11064196	Failed Validation	12	6426947	TNFRSF1A/LTBR/TNFRSF7	TNFRSF7	g.IVS2+1965T>A		-	-	-	-	-	-
rs11119474	Monomorphism	1	205004149	IL10/IL19	IL10	g.*4454T>C		-	G	0	1	-	-
rs11135710	MAF<0.05	8	23158030	TNFRSF10B/TNFRSF10C/TNFRSF10D/TNFRSF10A	CHMP7	g.IVS1+728T>A		T	A	0.04217	1	-	-
rs11216658	MAF<0.05	11	117347953	IL10RA	IL10RA	g.-14439C>G		C	G	0.03012	1	-	-
rs11230589	Monomorphism	11	60615063	CD5	CD5	g.-11545C>G		-	G	0	1	-	-
rs11265608	MAF<0.05	1	152630764	IL6R	IL6R	g.-13965G>A		A	G	0.04217	1	-	-
rs1143634	MAF<0.05	2	113306861	IL1A/IL1B	IL1B	g.Ex5+14C>T	p.F105F	A	G	0.01205	1	-	-
rs1148461	Failed Validation	1	12135924	TNFRSF8/TNFRSF1B	TNFRSF8	g.*10748->A>G		-	-	-	-	-	-
rs11536897	Monomorphism	9	119519831	TLR4	TLR4	g.*3083A>G		-	G	0	1	-	-
rs11569309	MAF<0.05	20	44181957	CD40	CD40	g.IVS1+1517T>C		C	T	0.0241	1	-	-
rs11569317	Monomorphism	20	44184257	CD40	CD40	g.IVS2-22C>G		-	C	0	1	-	-
rs11569357	Monomorphism	12	6423597	TNFRSF1A/LTBR/TNFRSF7	TNFRSF7	g.-925C>T		-	T	0	1	-	-
rs11569839	Monomorphism	1	12080468	TNFRSF8/TNFRSF1B	TNFRSF8	g.IVS3+607G>A		-	G	0	1	-	-
rs11569869	Monomorphism	1	12091882	TNFRSF8/TNFRSF1B	TNFRSF8	g.IVS4-328G>A		-	G	0	1	-	-
rs11571686	MAF<0.05	13	31820331	BRCA2	BRCA2	g.IVS13+1298A>C		C	A	0.01205	1	-	-
rs11571805	Monomorphism	13	31861947	BRCA2	BRCA2	g.IVS24-4879A>G		-	A	0	1	-	-
rs11574214	MAF<0.05	8	31052816	WRN	WRN	g.IVS7-415T>A		A	T	0.01205	1	-	-
rs11574235	MAF<0.05	8	31062892	WRN	WRN	g.IVS11+588C>T		T	C	0.03614	1	-	-
rs11574780	Monomorphism	5	55279795	IL6ST	IL6ST	g.IVS14-621A>G		-	T	0	1	-	-
rs11574849	Monomorphism	10	104149686	NFKB2	NFKB2	g.IVS14-141G>A		-	G	0	1	-	-
rs11575810	Monomorphism	4	123590742	IL2	IL2	g.*1614G>C		-	G	0	1	-	-
rs11595324	Monomorphism	10	101969408	CHUK	CHUK	g.IVS5-302A>G		-	T	0	1	-	-
rs11650590	Monomorphism	17	16777025	TNFRSF13B	LOC96597	g.-373G>A		-	C	0	1	-	-
rs11678166	Monomorphism	2	61011224	REL	FLJ32312	g.*11809T>C		-	G	0	1	-	-
rs11681040	Monomorphism	2	204260215	CD28	CD28	g.-19449C>T		-	C	0	1	-	-
rs11741137	Monomorphism	5	135254036	IL9	IL9	g.*1942A>G		-	C	0	1	-	-
rs11754332	MAF<0.05	6	90581618	CASP8AP2	MDN1	g.IVS1+4328G>C		G	C	0.01205	1	-	-
rs11755610	Failed Validation	6	90654149	CASP8AP2	CX62	g.-6759A>G		-	-	-	-	-	-
rs11756234	MAF<0.05	6	325328	IRF4	IRF4	g.-12824G>A		A	G	0.01807	1	-	-
rs11779484	MAF<0.05	8	23107300	TNFRSF10B/TNFRSF10C/TNFRSF10D/TNFRSF10A	TNFRSF10A	g.IVS9-1829A>G		C	T	0.006024	1	-	-
rs11791315	MAF<0.05	9	116743976	TNFSF8	TNFSF8	g.-11571C>A		T	G	0.0241	1	-	-
rs1181392	Monomorphism	2	204267047	CD28	CD28	g.-12617T>C		-	T	0	1	-	-
rs11862958	MAF<0.05	16	11962692	TNFRSF17	TNFRSF17	g.-3990C>T		T	C	0.006024	1	-	-
rs1193693	MAF<0.05	5	82573075	XRCC4	XRCC4	g.IVS6-17030G>A		G	A	0.04217	1	-	-
rs11967579	MAF<0.05	6	90596729	CASP8AP2	CASP8AP2	g.IVS1+183C>A		A	C	0.04217	1	-	-
rs11997323	MAF<0.05	8	23150340	TNFRSF10B/TNFRSF10C/TNFRSF10D/TNFRSF10A	LOC389641	g.*6911A>C		C	A	0.006024	1	-	-
rs12117125	Failed Validation	1	159759072	FCGR2A	HSPA6	g.-2000T>C		-	-	-	-	-	-
rs12121318	Monomorphism	1	159758892	FCGR2A	HSPA6	g.-2180A>G		-	G	0	1	-	-
rs12137934	Monomorphism	1	46501500	RAD54L	RAD54L	g.IVS8+1856A>G		-	A	0	1	-	-
rs12203592	Monomorphism	6	341321	IRF4	IRF4	g.IVS4+386C>T		-	C	0	1	-	-
rs12215515	Monomorphism	6	90591676	CASP8AP2	CASP8AP2	g.-21353C>T		-	T	0	1	-	-
rs1224166	Monomorphism	13	107765412	LIG4/TNFSF13B	TNFSF13B	g.*8124C>T		-	C	0	1	-	-
rs12257092	Failed Validation	10	90772807	FAS	FAS	g.*8619A>T		-	-	-	-	-	-
rs12319859	Monomorphism	12	6409752	TNFRSF1A/LTBR/TNFRSF7	LOC390284	g.NC_-8177C>T		-	T	0	1	-	-
rs1235369	Monomorphism	8	91042914	NBN	NBN	g.IVS9-2656T>C		-	A	0	1	-	-
rs12372938	Monomorphism	15	78057799	BCL2A1	BCL2A1	g.-7282G>A		-	C	0	1	-	-
rs12396	Monomorphism	15	50200608	BCL2L10	GNB5	g.Ex13-194C>G		-	G	0	1	-	-
rs12409568	MAF<0.05	1	100954535	VCAM1	VCAM1	g.-3469T>G		G	T	0.04819	1	-	-
rs12410307	Monomorphism	1	46502985	RAD54L	RAD54L	g.IVS8-2733G>A		-	G	0	1	-	-
rs12421641	MAF<0.05	11	36562795	TRAF6/RAG1/RAG2	RAG1	g.*8232A>C		A	C	0.04819	1	-	-
rs12508955	MAF<0.05	4	142869701	IL15	IL15	g.IVS7-749T>G		T	G	0.006024	1	-	-
rs1252037	Monomorphism	9	119491226	TLR4	TLR4	g.-15345T>C		-	C	0	1	-	-
rs12569232	MAF<0.05	1	209619687	TRAF5	C1orf97	g.-11917C>G		C	G	0.03614	1	-	-
rs12620435	Monomorphism	2	201704024	CFLAR	CFLAR	g.IVS2+910A>G		-	A	0	1	-	-
rs1267033	Monomorphism	2	161779584	TANK	TANK	g.IVS4-9088T>C		-	C	0	1	-	-
rs12712122	MAF<0.05	2	101958429	IL1R2	IL1R2	g.-33040T>C		T	C	0.006024	1	-	-
rs12723208	MAF<0.05	1	209577517	TRAF5	TRAF5	g.IVS2-8812A>G		G	A	0.03012	1	-	-
rs12764370	Monomorphism	10	101969472	CHUK	CHUK	g.IVS5-366A>G		-	T	0	1	-	-
rs12800151	Failed Validation	11	104430188	CASP4/CASP5/CASP1	LOC440067	g.*11326G>A		-	-	-	-	-	-
rs12827036	Monomorphism	12	120965673	BCL7A	BCL7A	g.IVS3-502G>T		-	G	0	1	-	-
rs12950509	MAF<0.05	17	16832671	TNFRSF13B	TNFRSF13B	g.-16556G>C		G	C	0.03012	1	-	-
rs12977027	Monomorphism	19	6530789	TNFSF7	TNFSF7	g.*6241T>C		-	G	0	1	-	-
rs13019590	MAF<0.05	2	60952924	REL	REL	g.-9555A>C		C	A	0.01807	1	-	-
rs13086832	MAF<0.05	3	161174976	IL12A	IL12A	g.-14561A>T		A	T	0.04217	0.1782	-	-
rs13178127	Monomorphism	5	82625188	XRCC4	XRCC4	g.IVS7+34936A>G		-	A	0	1	-	-
rs13180316	MAF<0.05	5	82495209	XRCC4	XRCC4	g.IVS3-32136G>A		A	G	0.04217	0.1211	-	-
rs13180356	MAF<0.05	5	82431630	XRCC4	XRCC4	g.IVS1-4855C>T		T	C	0.04217	0.1211	-	-
rs13208928	MAF<0.05	6	348470	IRF4	IRF4	g.IVS7-1548T>A		A	T	0.01205	1	-	-
rs13250228	MAF<0.05	8	90833612	RIPK2	RIPK2	g.-5811A>T		T	A	0.03012	0.01235	-	-
rs13251813	Monomorphism	8	31083753	WRN	WRN	g.IVS18-4920C>T		-	C	0	1	-	-
rs13276910	MAF<0.05	8	90826943	RIPK2	RIPK2	g.-12480G>T		G	T	0.04217	1	-	-
rs13312735	Monomorphism	16	65744712	TRADD	TRADD	g.*1340A>C		-	G	0	1	-	-
rs13345965	MAF<0.05	19	17820012	JAK3	JAK3	g.-3785G>A		T	C	0.01807	1	-	-
rs1337	Monomorphism	4	154851037	TLR2	RNF175	g.Ex9+55G>C	p.L307F	-	C	0	1	-	-
rs13382561	MAF<0.05	2	113580007	IL1RN	IL1RN	g.-12059G>A		G	A	0.04217	1	-	-
rs1368439	Monomorphism	5	158674592	IL12B	IL12B	g.Ex8-224C>A		-	T	0	1	-	-
rs1429265	Monomorphism	2	61006586	REL	REL	g.*3411G>T		-	T	0	1	-	-
rs1433048	Monomorphism	5	158688423	IL12B	IL12B	g.IVS1+1595C>T		-	A	0	1	-	-
rs1473792	Monomorphism	13	107675630	LIG4/TNFSF13B	LIG4	g.-14012G>A		-	T	0	1	-	-
rs1474348	MAF<0.05	7	22734433	IL6	IL6	g.IVS2-404C>G		C	G	0.006024	1	-	-
rs1555902	Monomorphism	13	107654784	LIG4/TNFSF13B	LIG4	g.*4097T>G		-	C	0	1	-	-
rs1618889	MAF<0.05	2	113572334	IL1RN	IL1RN	g.-19732A>C		A	C	0.006024	1	-	-
rs1650825	Monomorphism	11	129248603	NFRKB	NFRKB	g.IVS20+247T>C		-	A	0	1	-	-
rs16944894	HWE p<0.0001	15	89164307	BLM	BLM	g.*4793A>G		G	A	0.3963	1.2e-05	-	-
rs1695144	Monomorphism	12	67510209	MDM2	MDM2	g.IVS9+1231A>G		-	A	0	1	-	-
rs16994592	MAF<0.05	19	6537498	TNFSF7	TNFSF7	g.IVS2-82A>G		C	T	0.03614	1	-	-
rs17015767	Monomorphism	1	205018021	IL10/IL19	IL10	g.-5617G>C		-	G	0	1	-	-
rs17015865	Monomorphism	1	205025210	IL10/IL19	IL10	g.-12806T>C		-	G	0	1	-	-
rs17030340	MAF<0.05	4	154852288	TLR2	RNF175	g.IVS8+789C>T		A	G	0.01205	1	-	-
rs17103282	Monomorphism	14	34954566	NFKBIA	NFKBIA	g.-10964G>A		-	C	0	1	-	-
rs17169344	Monomorphism	5	135263914	IL9	IL9	g.-4509T>C		-	A	0	1	-	-
rs17187428	Monomorphism	8	128815526	MYC	MYC	g.-2495G>A		-	G	0	1	-	-
rs17202249	Monomorphism	4	74836107	IL8	IL8	g.*9061C>T		-	C	0	1	-	-
rs17215263	MAF<0.05	15	78043311	BCL2A1	BCL2A1	g.IVS1-2740A>C		G	T	0.0241	1	-	-
rs17287997	Monomorphism	15	78062095	BCL2A1	BCL2A1	g.-11578T>C		-	A	0	1	-	-
rs17370527	Failed Validation	1	170899580	FASLG	FASLG	g.IVS2-517A>T		-	-	-	-	-	-
rs17446518	MAF<0.05	11	104378760	CASP4/CASP5/CASP1	CASP5	g.IVS3+451T>A		T	A	0.006024	1	-	-
rs17447091	Monomorphism	10	90721249	FAS	FAS	g.-19364A>T		-	T	0	1	-	-
rs17484848	Monomorphism	2	111617031	BCL2L11	BCL2L11	g.IVS3-1505T>C		-	T	0	1	-	-
rs17497319	Monomorphism	13	107651063	LIG4/TNFSF13B	LIG4	g.*7818G>A		-	T	0	1	-	-
rs17498722	Monomorphism	13	107713986	LIG4/TNFSF13B	TNFSF13B	g.-6258A>G		-	G	0	1	-	-
rs17499386	Monomorphism	13	107735314	LIG4/TNFSF13B	TNFSF13B	g.IVS2-1838T>C		-	T	0	1	-	-
rs17597976	Monomorphism	2	113271107	IL1A/IL1B	IL1A	g.-13288T>C		-	G	0	1	-	-
rs17668357	MAF<0.05	10	101993896	CHUK	CWF19L1	g.IVS9-372C>G		C	G	0.04819	1	-	-
rs17678177	Monomorphism	18	58968859	BCL2	BCL2	g.IVS2-21887C>G		-	G	0	1	-	-
rs17679032	Monomorphism	18	59008140	BCL2	BCL2	g.IVS2-61168A>G		-	T	0	1	-	-
rs17703895	Monomorphism	19	6542146	TNFSF7	TNFSF7	g.Ex1+18G>T		-	C	0	1	-	-
rs17705608	Monomorphism	2	161699443	TANK	TANK	g.-44976A>G		-	A	0	1	-	-
rs17749561	Monomorphism	18	58934191	BCL2	BCL2	g.*12646T>C		-	G	0	1	-	-
rs17756266	MAF<0.05	18	58967033	BCL2	BCL2	g.IVS2-20061A>G		C	T	0.03012	1	-	-
rs17764308	MAF<0.05	6	90658989	CASP8AP2	CX62	g.-1919C>T		C	T	0.03012	1	-	-
rs1785883	Monomorphism	11	104429456	CASP4/CASP5/CASP1	LOC440067	g.*12058T>C		-	G	0	1	-	-
rs1800391	Monomorphism	8	31058246	WRN	WRN	g.Ex9-109G>A	p.M387I	-	G	0	1	-	-
rs1800669	Monomorphism	14	64478957	GPX2	GPX2	g.IVS1+19T>A		-	A	0	1	-	-
rs1800890	MAF<0.05	1	205015988	IL10/IL19	IL10	g.-3584A>T		T	A	0.01205	1	-	-
rs1803541	Monomorphism	2	127731383	ERCC3	ERCC3	g.Ex15-48G>A		-	C	0	1	-	-
rs1805810	Monomorphism	8	91033193	NBN	NBN	g.IVS12+1455T>C		-	A	0	1	-	-
rs1807999	MAF<0.05	18	59053152	BCL2	BCL2	g.IVS2+83015G>C		G	C	0.03614	1	-	-
rs1882545	Failed Validation	12	6755671	CD4	LAG3	g.IVS5+696G>A		-	-	-	-	-	-
rs1900173	MAF<0.05	5	55275763	IL6ST	IL6ST	g.IVS15-1427T>A		T	A	0.04217	1	-	-
rs1921310	Monomorphism	2	161757447	TANK	TANK	g.IVS2-10797A>G		-	A	0	1	-	-
rs1955559	MAF<0.05	14	22857807	BCL2L2	PABPN1	g.-2711A>G		A	G	0.006024	1	-	-
rs2020902	MAF<0.05	1	15706947	CASP9	CASP9	g.IVS3+8T>C		G	A	0.04217	1	-	-
rs2069827	Monomorphism	7	22731981	IL6	IL6	g.-1425G>T		-	G	0	1	-	-
rs2069861	Monomorphism	7	22738179	IL6	IL6	g.*461C>T		-	C	0	1	-	-
rs2110586	Monomorphism	19	17818309	JAK3	JAK3	g.IVS1+1446A>G		-	C	0	1	-	-
rs2110728	Monomorphism	2	201673923	CFLAR	NDUFB3	g.*15339G>A		-	G	0	1	-	-
rs2126042	MAF<0.05	13	31801685	BRCA2	BRCA2	g.IVS8+56C>T		T	C	0.03012	1	-	-
rs2227869	MAF<0.05	13	102313086	ERCC5	ERCC5	g.Ex8-369G>C	p.C529S	C	G	0.04217	1	-	-
rs2230229	MAF<0.05	8	23105237	TNFRSF10B/TNFRSF10C/TNFRSF10D/TNFRSF10A	TNFRSF10A	g.Ex10+235G>A	p.R441K	C	T	0.007353	1	-	-
rs2233455	MAF<0.05	16	65765434	TRADD	NOL3	g.Ex1-17C>T		T	C	0.01852	1	-	-
rs2234167	MAF<0.05	1	2480088	TNFRSF14	TNFRSF14	g.Ex7-6G>A	p.V241I	T	C	0.04217	1	-	-
rs2234978	MAF<0.05	10	90761809	FAS	FAS	g.Ex7-10T>C	p.T214T	T	C	0.0241	1	-	-
rs2237060	MAF<0.05	5	131998784	RAD50	RAD50	g.IVS21-1922T>G		G	T	0.01205	1	-	-
rs2243154	Monomorphism	3	161198936	IL12A	IL12A	g.*2895A>G		-	G	0	1	-	-
rs2243211	MAF<0.05	5	132029321	IL13/IL4	IL13	g.*5447A>C		A	C	0.01235	1	-	-
rs226473	Monomorphism	1	7931555	TNFRSF9	TNFRSF9	g.-8913G>A		-	C	0	1	-	-
rs226476	Monomorphism	1	7921550	TNFRSF9	TNFRSF9	g.IVS2-75A>C		-	G	0	1	-	-
rs2273175	Failed Validation	14	103229894	XRCC3	KNS2	g.IVS16+6593T>C		-	-	-	-	-	-
rs2283563	Failed Validation	16	27253855	IL4R	IL4R	g.IVS2+4835T>C		-	-	-	-	-	-
rs2301333	MAF<0.05	12	6751257	CD4	LAG3	g.-1022A>G		A	G	0.04217	1	-	-
rs235219	Monomorphism	1	12186942	TNFRSF8/TNFRSF1B	TNFRSF1B	g.IVS9+2127A>G		-	G	0	1	-	-
rs237554	MAF<0.05	19	6637659	TNFSF14	C3	g.IVS28+98A>G		T	C	0.01205	1	-	-
rs2446625	Failed Validation	1	159750672	FCGR2A	FCGR2A	g.IVS6+326G>A		-	-	-	-	-	-
rs2486316	MAF<0.05	1	12105832	TNFRSF8/TNFRSF1B	TNFRSF8	g.IVS8-96G>T		T	G	0.01205	1	-	-
rs2499428	Failed Validation	1	159764926	FCGR2A	HSPA6	g.*1921C>A		-	-	-	-	-	-
rs2512145	Monomorphism	11	117368242	IL10RA	IL10RA	g.IVS3-924A>G		-	G	0	1	-	-
rs2512148	Monomorphism	11	117378258	IL10RA	IL10RA	g.*2691A>C		-	C	0	1	-	-
rs2532105	Monomorphism	15	89156489	BLM	BLM	g.IVS21+849G>A		-	G	0	1	-	-
rs2639654	Monomorphism	1	170899226	FASLG	FASLG	g.IVS2-871A>C		-	C	0	1	-	-
rs2666955	Failed Validation	6	325920	IRF4	IRF4	g.-12232C>T		-	-	-	-	-	-
rs2682587	Monomorphism	19	48774269	XRCC1	XRCC1	g.-2818T>G		-	C	0	1	-	-
rs2731852	MAF<0.05	5	82544166	XRCC4	XRCC4	g.IVS6+7670G>A		G	A	0.0241	1	-	-
rs2737327	MAF<0.05	8	31077307	WRN	WRN	g.IVS17-600A>G		A	G	0.04819	1	-	-
rs2770150	Monomorphism	9	119502960	TLR4	TLR4	g.-3611G>A		-	A	0	1	-	-
rs2797296	Failed Validation	6	324834	IRF4	IRF4	g.-13318C>G		-	-	-	-	-	-
rs2797297	Failed Validation	6	325253	IRF4	IRF4	g.-12899C>T		-	-	-	-	-	-
rs2834160	Monomorphism	21	33541983	IFNAR2	IFNAR2	g.IVS5-901T>C		-	T	0	1	-	-
rs2834178	Monomorphism	21	33599261	IL10RB	IL10RB	g.*8728C>T		-	T	0	1	-	-
rs2843705	Monomorphism	21	33596425	IL10RB	IL10RB	g.*5892G>T		-	G	0	1	-	-
rs2849380	Monomorphism	18	59130340	BCL2	BCL2	g.IVS2+5827G>A		-	C	0	1	-	-
rs2850768	MAF<0.05	18	59152390	BCL2	FVT1	g.IVS9+1080T>C		G	A	0.0241	1	-	-
rs2854496	Monomorphism	19	48760033	XRCC1	XRCC1	g.IVS2-3021G>A		-	C	0	1	-	-
rs2862834	MAF<0.05	10	90731354	FAS	FAS	g.-9259G>A		A	G	0.006024	1	-	-
rs2871444	Failed Validation	2	101979282	IL1R2	IL1R2	g.IVS1-2609A>G		-	-	-	-	-	-
rs292240	MAF<0.05	6	90663052	CASP8AP2	CX62	g.*511G>A		G	A	0.03012	1	-	-
rs2986751	Monomorphism	1	6457368	TNFRSF25	PLEKHG5	g.IVS7-134C>T		-	G	0	1	-	-
rs2986754	Monomorphism	1	6449052	TNFRSF25	TNFRSF25	g.-297C>G		-	C	0	1	-	-
rs3007420	Monomorphism	1	6452410	TNFRSF25	TNFRSF25	g.IVS18-87C>G		-	G	0	1	-	-
rs3007421	MAF<0.05	1	6452776	TNFRSF25	PLEKHG5	g.IVS18+107C>T		A	G	0.01205	1	-	-
rs3019551	MAF<0.05	11	60610775	CD5	CD5	g.-15833G>A		G	A	0.0241	1	-	-
rs3019565	MAF<0.05	11	60616566	CD5	CD5	g.-10042C>T		C	T	0.02206	1	-	-
rs3024493	MAF<0.05	1	205010591	IL10/IL19	IL10	g.IVS3+284G>T		A	C	0.01807	1	-	-
rs3024537	Monomorphism	16	27260320	IL4R	IL4R	g.IVS3-623G>A		-	G	0	1	-	-
rs3024578	Monomorphism	16	27265852	IL4R	IL4R	g.IVS6+412G>A		-	G	0	1	-	-
rs3024672	Monomorphism	16	27280632	IL4R	IL4R	g.IVS11-442G>A		-	G	0	1	-	-
rs3025010	Failed Validation	6	43855555	VEGF	VEGF	g.IVS5-892T>C		-	-	-	-	-	-
rs3026271	Monomorphism	8	91052428	NBN	NBN	g.IVS7+149T>C		-	A	0	1	-	-
rs3087263	MAF<0.05	2	113602239	IL1RN	IL1RN	g.IVS4+451G>A		A	G	0.006024	1	-	-
rs3092968	Monomorphism	2	218735269	IL8RB/IL8RA	IL8RA	g.*1857C>T		-	A	0	1	-	-
rs3130062	Monomorphism	6	31633891	LTA/TNF	NFKBIL1	g.Ex4+114C>T	p.R224C	-	T	0	1	-	-
rs3135989	MAF<0.05	17	30344256	LIG3	LIG3	g.IVS8+432T>G		G	T	0.0241	1	-	-
rs3136581	MAF<0.05	3	173725855	TNFSF10	TNFSF10	g.-1986C>T		A	G	0.0241	1	-	-
rs3136609	Monomorphism	3	173708179	TNFSF10	TNFSF10	g.IVS4-776C>T		-	G	0	1	-	-
rs3138156	Monomorphism	1	6446017	TNFRSF25	TNFRSF25	g.IVS5-223A>G		-	T	0	1	-	-
rs3138158	Monomorphism	1	6442899	TNFRSF25	ESPN	g.Ex13+254C>T		-	C	0	1	-	-
rs31562	Monomorphism	5	135264193	IL9	IL9	g.-4788A>G		-	T	0	1	-	-
rs315946	Monomorphism	2	113610335	IL1RN	IL1RN	g.*3415G>A		-	G	0	1	-	-
rs315949	MAF<0.05	2	113609245	IL1RN	IL1RN	g.*2325G>A		A	G	0.04217	1	-	-
rs3176878	Monomorphism	1	100976286	VCAM1	VCAM1	g.Ex9+20C>T	p.D601D	-	C	0	1	-	-
rs3181165	Monomorphism	7	142696806	CASP2	CASP2	g.IVS1-6G>A		-	G	0	1	-	-
rs3181166	MAF<0.05	7	142697020	CASP2	CASP2	g.IVS2+149T>G		G	T	0.01205	1	-	-
rs3181174	Monomorphism	11	104381934	CASP4/CASP5/CASP1	CASP5	g.IVS2+1086A>T		-	T	0	1	-	-
rs3181330	MAF<0.05	11	104374470	CASP4/CASP5/CASP1	CASP5	g.IVS6+352T>C		G	A	0.006024	1	-	-
rs3181345	Monomorphism	4	110835362	CASP6	CASP6	g.IVS4-57G>A		-	C	0	1	-	-
rs3181354	Failed Validation	9	116732994	TNFSF8	TNFSF8	g.-589C>T		-	-	-	-	-	-
rs3212741	MAF<0.05	19	17812178	JAK3	JAK3	g.IVS8-28C>T		A	G	0.0241	1	-	-
rs3212752	MAF<0.05	19	17809732	JAK3	JAK3	g.IVS12+9A>G		C	T	0.03614	1	-	-
rs3218536	Monomorphism	7	151976940	XRCC2	XRCC2	g.Ex3+442G>A	p.R188H	-	C	0	1	-	-
rs3448	Monomorphism	3	49371755	GPX1	GPX1	g.-1039G>A		-	C	0	1	-	-
rs365238	Monomorphism	3	173724560	TNFSF10	TNFSF10	g.-691A>G		-	T	0	1	-	-
rs374681	Failed Validation	1	159753239	FCGR2A	FCGR2A	g.IVS6-1150A>G		-	-	-	-	-	-
rs3751601	Failed Validation	15	50191508	BCL2L10	BCL2L10	g.IVS1+219C>T		-	-	-	-	-	-
rs3758483	MAF<0.05	10	90738716	FAS	FAS	g.-1897T>C		C	T	0.006024	1	-	-
rs3765457	MAF<0.05	20	44190620	CD40	CD40	g.IVS8+216A>G		G	A	0.0241	1	-	-
rs3808530	MAF<0.05	8	23111674	TNFRSF10B/TNFRSF10C/TNFRSF10D/TNFRSF10A	TNFRSF10A	g.IVS8-1012T>C		G	A	0.04217	1	-	-
rs3862667	MAF<0.05	11	60631605	CD5	CD5	g.IVS1+4942T>G		G	T	0.03012	1	-	-
rs3866815	Failed Validation	6	324031	IRF4	IRF4	g.-14121C>A		-	-	-	-	-	-
rs390993	Monomorphism	8	90842346	RIPK2	RIPK2	g.IVS1-1848G>A		-	G	0	1	-	-
rs3914430	Failed Validation	6	326918	IRF4	IRF4	g.-11234C>T		-	-	-	-	-	-
rs3917281	Monomorphism	2	102147085	IL1R1	IL1R1	g.IVS2-581G>T		-	T	0	1	-	-
rs3917285	Monomorphism	2	102147598	IL1R1	IL1R1	g.IVS2-68T>A		-	T	0	1	-	-
rs3917292	Monomorphism	2	102149484	IL1R1	IL1R1	g.IVS5+311G>A		-	G	0	1	-	-
rs3917329	Monomorphism	2	102162295	IL1R1	IL1R1	g.Ex11-472G>T		-	G	0	1	-	-
rs400835	Failed Validation	1	159761356	FCGR2A	HSPA6	g.Ex1+697G>A	p.R95Q	-	-	-	-	-	-
rs4075606	Monomorphism	17	16831544	TNFRSF13B	TNFRSF13B	g.-15429G>A		-	C	0	1	-	-
rs410236	Failed Validation	1	159751260	FCGR2A	FCGR2A	g.IVS6+914C>T		-	-	-	-	-	-
rs4121642	MAF<0.05	11	104362276	CASP4/CASP5/CASP1	CASP5	g.*9404C>T		A	G	0.006024	1	-	-
rs4141134	MAF<0.05	2	101972958	IL1R2	IL1R2	g.-18511G>A		G	A	0.01807	1	-	-
rs4149579	Monomorphism	12	6317618	TNFRSF1A/LTBR/TNFRSF7	TNFRSF1A	g.IVS1+3585G>A		-	C	0	1	-	-
rs4150351	Monomorphism	13	102320968	ERCC5	ERCC5	g.IVS12-1581A>C		-	A	0	1	-	-
rs4150386	Monomorphism	13	102325529	ERCC5	ERCC5	g.IVS14-129A>C		-	A	0	1	-	-
rs4150393	Monomorphism	13	102326659	ERCC5	ERCC5	g.*404A>G		-	A	0	1	-	-
rs4150403	Monomorphism	2	127766538	ERCC3	ERCC3	g.IVS3+118G>A		-	C	0	1	-	-
rs4242394	MAF<0.05	8	23144190	TNFRSF10B/TNFRSF10C/TNFRSF10D/TNFRSF10A	LOC389641	g.Ex3-189T>C		T	C	0.006024	1	-	-
rs4252287	MAF<0.05	11	117373848	IL10RA	IL10RA	g.IVS6-792G>A		A	G	0.03614	1	-	-
rs4252314	Monomorphism	11	117373727	IL10RA	IL10RA	g.IVS6-913A>G		-	A	0	1	-	-
rs4253077	Monomorphism	10	50392975	ERCC6	ERCC6	g.IVS5-8911T>G		-	C	0	1	-	-
rs4253200	Monomorphism	10	50350851	ERCC6	ERCC6	g.IVS15+110A>G		-	T	0	1	-	-
rs4342983	Monomorphism	10	115440504	CASP7	CASP7	g.IVS2-1209C>G		-	G	0	1	-	-
rs440879	MAF<0.05	11	60617465	CD5	CD5	g.-9143A>G		A	G	0.03614	1	-	-
rs441577	MAF<0.05	6	90648944	CASP8AP2	CASP8AP2	g.*8694T>C		C	T	0.03012	1	-	-
rs4552807	MAF<0.05	7	22717544	IL6	IL6	g.-15862A>T		T	A	0.04819	1	-	-
rs4645900	Monomorphism	19	54156175	BAX	BAX	g.Ex6-157C>T		-	C	0	1	-	-
rs4647322	Failed Validation	7	142708143	CASP2	CASP2	g.IVS10+488T>C		-	-	-	-	-	-
rs4648022	Monomorphism	4	103715475	NFKB1	NFKB1	g.IVS6-1596C>T		-	C	0	1	-	-
rs4648110	MAF<0.05	4	103752867	NFKB1	NFKB1	g.IVS22+58T>A		A	T	0.04819	1	-	-
rs4657039	Failed Validation	1	159729352	FCGR2A	FCGR2A	g.-12529A>G		-	-	-	-	-	-
rs4657054	Failed Validation	1	159759929	FCGR2A	HSPA6	g.-1143G>A		-	-	-	-	-	-
rs466321	MAF<0.05	6	90649327	CASP8AP2	CASP8AP2	g.*9077G>C		C	G	0.03012	1	-	-
rs4675358	Monomorphism	2	204287358	CD28	CD28	g.IVS1+7642T>C		-	C	0	1	-	-
rs4696483	Monomorphism	4	154838705	TLR2	TLR2	g.IVS2-4789T>C		-	C	0	1	-	-
rs4803817	Failed Validation	19	50599800	ERCC2/ERCC1	CD3EAP	g.-1994A>G		-	-	-	-	-	-
rs481845	MAF<0.05	11	69711231	FADD	TMEM16A	g.IVS24-261A>G		A	G	0.04412	1	-	-
rs4833103	Monomorphism	4	38491897	TLR10/TLR1/TLR6	TLR1	g.-15049T>G		-	C	0	1	-	-
rs4849122	Monomorphism	2	113277392	IL1A/IL1B	IL1A	g.-19573T>C		-	A	0	1	-	-
rs4889653	MAF<0.05	16	30803214	BCL7C	BCL7C	g.*3472G>A		C	T	0.01807	1	-	-
rs492859	Monomorphism	11	104390522	CASP4/CASP5/CASP1	CASP5	g.-5645T>G		-	C	0	1	-	-
rs4932365	Monomorphism	15	89152106	BLM	BLM	g.IVS19-1265C>A		-	C	0	1	-	-
rs4934436	MAF<0.05	10	90773300	FAS	FAS	g.*9112C>T		C	T	0.03012	1	-	-
rs4959780	Failed Validation	6	319557	IRF4	IRF4	g.-18595C>T		-	-	-	-	-	-
rs4979474	MAF<0.05	9	116735805	TNFSF8	TNFSF8	g.-3400T>C		A	G	0.03614	1	-	-
rs4985694	MAF<0.05	17	16802057	TNFRSF13B	TNFRSF13B	g.IVS1-5435C>T		A	G	0.0241	1	-	-
rs4985720	Monomorphism	17	16802955	TNFRSF13B	TNFRSF13B	g.IVS1-6333G>C		-	G	0	1	-	-
rs4985757	Monomorphism	17	16820148	TNFRSF13B	TNFRSF13B	g.-4033T>G		-	C	0	1	-	-
rs4987852	Monomorphism	18	58944901	BCL2	BCL2	g.Ex3+2072A>G		-	T	0	1	-	-
rs4987853	Monomorphism	18	58944635	BCL2	BCL2	g.Ex3+2338A>G		-	T	0	1	-	-
rs4987873	Monomorphism	18	58940977	BCL2	BCL2	g.*5860A>T		-	T	0	1	-	-
rs501626	Monomorphism	11	104423342	CASP4/CASP5/CASP1	CASP1	g.-12291A>G		-	T	0	1	-	-
rs5030390	Monomorphism	19	10243537	ICAM1/ICAM4/ICAM5	ICAM1	g.IVS1+635G>A		-	G	0	1	-	-
rs5030552	Monomorphism	4	110838455	CASP6	CASP6	g.IVS2-82A>G		-	T	0	1	-	-
rs5030717	MAF<0.05	9	119513655	TLR4	TLR4	g.IVS3-833A>G		G	A	0.0241	1	-	-
rs5030772	Monomorphism	1	170899973	FASLG	FASLG	g.IVS2-124A>G		-	A	0	1	-	-
rs509936	MAF<0.05	11	60614607	CD5	CD5	g.-12001A>G		G	A	0.01829	1	-	-
rs520639	Monomorphism	6	44332969	NFKBIE	SLC35B2	g.IVS1+146G>A		-	C	0	1	-	-
rs522807	Failed Validation	1	12146826	TNFRSF8/TNFRSF1B	TNFRSF1B	g.-2909C>A		-	-	-	-	-	-
rs528076	Monomorphism	11	104413398	CASP4/CASP5/CASP1	CASP1	g.-2347A>G		-	C	0	1	-	-
rs545230	MAF<0.05	11	60626057	CD5	CD5	g.-551C>A		C	A	0.006098	1	-	-
rs572350	Monomorphism	11	60633787	CD5	CD5	g.IVS1-5317A>G		-	G	0	1	-	-
rs5743594	Monomorphism	4	38479146	TLR10/TLR1/TLR6	TLR1	g.IVS2-182C>T		-	G	0	1	-	-
rs5743611	Monomorphism	4	38476609	TLR10/TLR1/TLR6	TLR1	g.Ex4+306G>C	p.R80T	-	C	0	1	-	-
rs5743704	Monomorphism	4	154845401	TLR2	TLR2	g.Ex3-1293C>A	p.P631H	-	C	0	1	-	-
rs5744258	MAF<0.05	11	111526977	IL18	IL18	g.IVS3-838G>C		G	C	0.006024	1	-	-
rs5745984	Monomorphism	1	12163002	TNFRSF8/TNFRSF1B	TNFRSF1B	g.IVS1-8438C>G		-	C	0	1	-	-
rs5746016	Monomorphism	1	12173566	TNFRSF8/TNFRSF1B	TNFRSF1B	g.IVS2-35C>T		-	C	0	1	-	-
rs579543	MAF<0.05	2	113606102	IL1RN	IL1RN	g.IVS6-602G>A		A	G	0.0241	1	-	-
rs597519	MAF<0.05	1	12157472	TNFRSF8/TNFRSF1B	TNFRSF1B	g.IVS1+7659T>C		C	T	0.006024	1	-	-
rs6002551	MAF<0.05	22	40668098	TNFRSF13C	C22orf18	g.IVS5+1462C>T		A	G	0.01807	1	-	-
rs6060563	Monomorphism	20	29712464	BCL2L1	BCL2L1	g.*4948A>G		-	C	0	1	-	-
rs6065926	Monomorphism	20	44169261	CD40	CD40	g.-11128A>G		-	G	0	1	-	-
rs6074021	Failed Validation	20	44170203	CD40	CD40	g.-10186C>G		-	-	-	-	-	-
rs616340	MAF<0.05	11	60632877	CD5	CD5	g.IVS1+6214G>A		G	A	0.03012	1	-	-
rs637186	Monomorphism	11	60649182	CD5	CD5	g.Ex9-18A>G	p.H461R	-	G	0	1	-	-
rs6425201	Failed Validation	1	171279427	TNFSF18	TNFSF18	g.IVS2+275G>A		-	-	-	-	-	-
rs6427596	Failed Validation	1	159750799	FCGR2A	FCGR2A	g.IVS6+453G>T		-	-	-	-	-	-
rs6427597	Failed Validation	1	159750904	FCGR2A	FCGR2A	g.IVS6+558T>G		-	-	-	-	-	-
rs6427598	Failed Validation	1	159751188	FCGR2A	FCGR2A	g.IVS6+842T>A		-	-	-	-	-	-
rs6450361	MAF<0.05	5	55336283	IL6ST	IL6ST	g.-28419G>A		T	C	0.04217	1	-	-
rs6557627	MAF<0.05	8	23112116	TNFRSF10B/TNFRSF10C/TNFRSF10D/TNFRSF10A	TNFRSF10A	g.IVS8+608G>C		G	C	0.006024	1	-	-
rs6557638	Monomorphism	8	23129747	TNFRSF10B/TNFRSF10C/TNFRSF10D/TNFRSF10A	TNFRSF10A	g.IVS1-4077G>C		-	G	0	1	-	-
rs665744	Monomorphism	3	161172218	IL12A	IL12A	g.-17319C>T		-	C	0	1	-	-
rs6667202	MAF<0.05	1	205023715	IL10/IL19	IL10	g.-11311T>G		C	A	0.0122	1	-	-
rs666886	Monomorphism	11	60657688	CD5	VPS37C	g.IVS3-303G>A		-	C	0	1	-	-
rs6672742	MAF<0.05	1	209584388	TRAF5	TRAF5	g.IVS2-1941A>G		G	A	0.01205	1	-	-
rs6673928	Monomorphism	1	205003868	IL10/IL19	IL10	g.*4735A>C		-	G	0	1	-	-
rs6711781	Failed Validation	2	218727362	IL8RB/IL8RA	IL8RA	g.*9764C>A		-	-	-	-	-	-
rs6727356	Failed Validation	2	111629200	BCL2L11	BCL2L11	g.IVS6+1248A>G		-	-	-	-	-	-
rs6736233	Monomorphism	2	201827219	CASP10/CASP8	CASP8	g.IVS2-3805G>C		-	G	0	1	-	-
rs6761387	MAF<0.05	2	218704798	IL8RB/IL8RA	IL8RB	g.IVS2+2465C>T		T	C	0.01205	1	-	-
rs6899766	Failed Validation	6	325089	IRF4	IRF4	g.-13063C>G		-	-	-	-	-	-
rs6900384	MAF<0.05	6	342937	IRF4	IRF4	g.IVS5+685T>G		G	T	0.03614	1	-	-
rs6913036	Monomorphism	6	90608986	CASP8AP2	CASP8AP2	g.IVS1-4016G>A		-	G	0	1	-	-
rs6925816	Failed Validation	6	325179	IRF4	IRF4	g.-12973C>G		-	-	-	-	-	-
rs6964582	MAF<0.05	7	151982395	XRCC2	XRCC2	g.IVS2-5014G>C		C	G	0.04819	1	-	-
rs6982140	Monomorphism	8	31118970	WRN	WRN	g.IVS26+137T>C		-	T	0	1	-	-
rs6995408	Monomorphism	8	23117823	TNFRSF10B/TNFRSF10C/TNFRSF10D/TNFRSF10A	TNFRSF10A	g.IVS2-1604C>T		-	A	0	1	-	-
rs6998169	Monomorphism	8	91019437	NBN	NBN	g.IVS15-958A>T		-	T	0	1	-	-
rs7081472	Failed Validation	10	50436502	ERCC6	ERCC6	g.-25485T>C		-	-	-	-	-	-
rs7123277	MAF<0.05	11	104333947	CASP4/CASP5/CASP1	CASP4	g.IVS1-1315A>G		C	T	0.006024	1	-	-
rs7143541	Failed Validation	14	64489530	GPX2	RAB15	g.IVS1-488C>A		-	-	-	-	-	-
rs7184692	MAF<0.05	16	65737672	TRADD	LIN10	g.IVS14-10T>C		C	T	0.01205	1	-	-
rs7189024	Failed Validation	16	11952259	TNFRSF17	TNFRSF17	g.-14423A>G		-	-	-	-	-	-
rs7245564	MAF<0.05	19	17824878	JAK3	JAK3	g.-8651C>A		G	T	0.03049	1	-	-
rs7270207	Monomorphism	20	29784544	BCL2L1	TPX2	g.-24396C>G		-	G	0	1	-	-
rs7342164	MAF<0.05	11	60639670	CD5	CD5	g.IVS2+528C>G		G	C	0.03012	1	-	-
rs7354225	Monomorphism	20	29760542	BCL2L1	BCL2L1	g.IVS2+12577G>A		-	C	0	1	-	-
rs746481	Monomorphism	11	33861947	LMO2	LMO2	g.IVS1-1938C>T		-	A	0	1	-	-
rs7504096	Monomorphism	17	16817808	TNFRSF13B	TNFRSF13B	g.-1693T>C		-	G	0	1	-	-
rs7529425	Monomorphism	1	159746223	FCGR2A	FCGR2A	g.IVS3-11G>A		-	G	0	1	-	-
rs755004	MAF<0.05	3	161183019	IL12A	IL12A	g.-6518G>A		A	G	0.04819	1	-	-
rs7568498	Monomorphism	2	161737359	TANK	TANK	g.IVS1-7012T>G		-	T	0	1	-	-
rs7583529	MAF<0.05	2	201696483	CFLAR	CFLAR	g.IVS1-6214G>A		A	G	0.006024	1	-	-
rs7596461	Monomorphism	2	113294428	IL1A/IL1B	IL1B	g.*9980G>A		-	C	0	1	-	-
rs7604723	MAF<0.05	2	24167347	TP53I3	TP53I3	g.-6646G>A		T	C	0.04819	1	-	-
rs7604989	MAF<0.05	2	60987297	REL	REL	g.IVS4+5575A>G		G	A	0.006024	1	-	-
rs762679	Monomorphism	8	49047989	PRKDC	MCM4	g.Ex13+20T>A	p.L650M	-	A	0	1	-	-
rs7660429	Monomorphism	4	38458876	TLR10/TLR1/TLR6	TLR10	g.IVS1+2061G>C		-	C	0	1	-	-
rs768063	Monomorphism	4	110839905	CASP6	CASP6	g.IVS1-958A>G		-	C	0	1	-	-
rs769412	MAF<0.05	12	67519482	MDM2	MDM2	g.Ex12+162A>G	p.E354E	G	A	0.01807	1	-	-
rs7739011	Failed Validation	6	3057529	RIPK1	RIPK1	g.IVS9-757C>T		-	-	-	-	-	-
rs7753579	Failed Validation	6	320759	IRF4	IRF4	g.-17393C>T		-	-	-	-	-	-
rs7765221	MAF<0.05	6	3053287	RIPK1	RIPK1	g.IVS8+2003A>G		A	G	0.04217	1	-	-
rs7776857	MAF<0.05	7	22721293	IL6	IL6	g.-12113G>T		G	T	0.006024	1	-	-
rs7801617	Monomorphism	7	22724607	IL6	IL6	g.-8799A>G		-	G	0	1	-	-
rs7806162	MAF<0.05	7	142691927	CASP2	FLJ90586	g.-1245A>C		A	C	0.03614	1	-	-
rs7810486	MAF<0.05	7	142717233	CASP2	CASP2	g.*4946A>G		A	G	0.03614	1	-	-
rs7860896	MAF<0.05	9	119522924	TLR4	TLR4	g.*6176A>G		G	A	0.04217	1	-	-
rs799923	Monomorphism	17	38505457	BRCA1	BRCA1	g.IVS8-34C>T		-	G	0	1	-	-
rs8057598	MAF<0.05	16	65766756	TRADD	NOL3	g.Ex4+306A>G		G	A	0.01205	1	-	-
rs8064661	MAF<0.05	17	16823389	TNFRSF13B	TNFRSF13B	g.-7274G>A		C	T	0.0241	1	-	-
rs8065836	MAF<0.05	17	16778090	TNFRSF13B	LOC96597	g.-1438T>C		A	G	0.01852	1	-	-
rs8074984	MAF<0.05	17	16819795	TNFRSF13B	TNFRSF13B	g.-3680T>C		G	A	0.0241	1	-	-
rs8079130	Monomorphism	17	16825685	TNFRSF13B	TNFRSF13B	g.-9570G>A		-	C	0	1	-	-
rs8128184	Monomorphism	21	33599002	IL10RB	IL10RB	g.*8469A>G		-	G	0	1	-	-
rs8178017	Monomorphism	8	49014778	PRKDC	PRKDC	g.Ex11+33G>A		-	C	0	1	-	-
rs8178068	Monomorphism	8	48978431	PRKDC	PRKDC	g.IVS26-523G>A		-	C	0	1	-	-
rs8178108	Monomorphism	8	48956724	PRKDC	PRKDC	g.IVS37-90A>G		-	T	0	1	-	-
rs8178179	Monomorphism	8	48907680	PRKDC	PRKDC	g.IVS59-640A>C		-	T	0	1	-	-
rs8178556	Monomorphism	21	33588425	IL10RB	IL10RB	g.IVS6-1934T>G		-	T	0	1	-	-
rs859663	Monomorphism	1	170904078	FASLG	FASLG	g.*2298T>G		-	G	0	1	-	-
rs868284	Monomorphism	13	107652214	LIG4/TNFSF13B	LIG4	g.*6667C>T		-	G	0	1	-	-
rs870825	Monomorphism	4	185825039	CASP3	FLJ33167	g.IVS6+827A>G		-	A	0	1	-	-
rs872071	Failed Validation	6	356064	IRF4	IRF4	g.Ex9-130A>G		-	-	-	-	-	-
rs880790	Failed Validation	1	205026839	IL10/IL19	IL19	g.-12023T>C		-	-	-	-	-	-
rs913930	MAF<0.05	9	119523830	TLR4	TLR4	g.*7082G>A		G	A	0.03614	1	-	-
rs919766	MAF<0.05	5	158680142	IL12B	IL12B	g.IVS4-36T>G		C	A	0.04819	1	-	-
rs942625	MAF<0.05	14	64492395	GPX2	RAB15	g.IVS1-3353T>C		G	A	0.04819	1	-	-
rs947890	MAF<0.05	11	117379703	IL10RA	IL10RA	g.*4136G>A		A	G	0.04217	1	-	-
rs9501958	MAF<0.05	6	323970	IRF4	IRF4	g.-14182A>G		A	G	0.03676	1	-	-
rs951193	Monomorphism	2	102152231	IL1R1	IL1R1	g.IVS6+676C>T		-	C	0	1	-	-
rs953861	Monomorphism	5	158705160	IL12B	IL12B	g.-18791T>C		-	A	0	1	-	-
rs9658727	MAF<0.05	10	90751845	FAS	FAS	g.IVS1-921T>C		C	T	0.006024	1	-	-
rs975074	MAF<0.05	1	171280390	TNFSF18	TNFSF18	g.IVS1-658G>T		C	A	0.04819	1	-	-
rs9922891	Monomorphism	16	11948012	TNFRSF17	TNFRSF17	g.-18670A>G		-	G	0	1	-	-
rs9933843	MAF<0.05	16	30811180	BCL7C	BCL7C	g.IVS4+228G>A		C	T	0.03012	1	-	-
rs9943888	HWE p<0.0001	13	31826202	BRCA2	BRCA2	g.IVS13-796A>G		G	A	0.06024	3.044e-05	-	-
rs999259	Failed Validation	21	33588362	IL10RB	IL10RB	g.IVS6-1997C>T		-	-	-	-	-	-
